# Supplementary material for: MyD88 dimerization inhibitor ST2825 targets the aggressiveness of synovial fibroblasts in rheumatoid arthritis patients
Source: Arthritis Res Ther. 2023 Sep 25;25:180. doi: 10.1186/s13075-023-03145-0 (PMC10519089; doi:10.1186/s13075-023-03145-0)
Supplement: Supplementary file 3 — Additional file 3: Supplementary Data 2. Reactome Pathway Enrichment LPS-stimulated RA. [file 13075_2023_3145_MOESM3_ESM.xlsx]

## Sheet: Sheet1
Pathway	zscore	combined_score	FDR	pvalue	overlapping_genes	gene_set_library	log10P	geneset
Cell Cycle Homo sapiens R-HSA-1640170	5.44473	287.152	9.81851e-21	1.246e-23	['LIN54', 'AHCTF1', 'ERCC6L', 'NUP107', 'NUP188', 'MCM8', 'CCP110', 'RSF1', 'BRCA1', 'SMC3', 'SMC4', 'SMC2', 'PCM1', 'PSMD5', 'EXO1', 'NUF2', 'MYBL2', 'KNTC1', 'FBXO5', 'SPDL1', 'TOPBP1', 'CDK5RAP2', 'RFC3', 'RMI1', 'RFC2', 'VRK1', 'HAUS6', 'ESCO2', 'TUBA4A', 'CLIP1', 'TFDP1', 'DBF4', 'RBL1', 'CCNE2', 'PSME4', 'MCM4', 'NUP54', 'MCM6', 'MCM2', 'NUP205', 'NCAPG', 'SKA1', 'PSMC3IP', 'WRN', 'CDC45', …	Reactome Pathways	22.9045	downregulated
Cell Cycle, Mitotic Homo sapiens R-HSA-69278	5.53444	253.046	5.47852e-18	1.39049e-20	['LIN54', 'AHCTF1', 'ERCC6L', 'NUP107', 'NUP188', 'MCM8', 'CCP110', 'SMC3', 'SMC4', 'SMC2', 'PCM1', 'PSMD5', 'NUF2', 'KNTC1', 'MYBL2', 'SPDL1', 'FBXO5', 'CDK5RAP2', 'RFC3', 'RFC2', 'VRK1', 'HAUS6', 'ESCO2', 'TUBA4A', 'CLIP1', 'TFDP1', 'DBF4', 'RBL1', 'CCNE2', 'PSME4', 'MCM4', 'NUP54', 'MCM6', 'MCM2', 'NUP205', 'NCAPG', 'SKA1', 'CDC45', 'TPR', 'CEP78', 'PLK4', 'RRM2', 'NUP155', 'CDC6', 'POLA1', 'S…	Reactome Pathways	19.8568	downregulated
DNA Repair Homo sapiens R-HSA-73894	4.44177	93.1707	2.03996e-07	7.76636e-10	['DCLRE1B', 'PAXIP1', 'RIF1', 'BRCA1', 'WRN', 'EXO1', 'USP1', 'RBBP8', 'CLSPN', 'TOPBP1', 'POLQ', 'TIPIN', 'USP7', 'RFC3', 'RMI1', 'PARP2', 'RFC2', 'XRCC2', 'REV1', 'FANCB', 'PIAS1', 'MSH6', 'MSH2', 'FANCD2', 'UBE2T', 'POLE2', 'FAM175A', 'DTL']	Reactome Pathways	9.10978	downregulated
M Phase Homo sapiens R-HSA-68886	4.36507	84.2769	8.11878e-07	4.12121e-09	['NUP205', 'AHCTF1', 'ERCC6L', 'NUP107', 'NUP188', 'NCAPG', 'SMC3', 'SMC4', 'SKA1', 'SMC2', 'PSMD5', 'NUF2', 'TPR', 'KNTC1', 'FBXO5', 'SPDL1', 'NUP155', 'VRK1', 'CLIP1', 'STAG2', 'CENPI', 'TAOK1', 'PSME4', 'CENPK', 'NUP54', 'NCAPD3']	Reactome Pathways	8.38498	downregulated
G2/M Checkpoints Homo sapiens R-HSA-69481	5.84042	109.693	1.09846e-06	6.96993e-09	['RFC3', 'MCM8', 'RFC2', 'RMI1', 'CDC6', 'BRCA1', 'WRN', 'DBF4', 'CDC45', 'PSMD5', 'EXO1', 'PSME4', 'FAM175A', 'RBBP8', 'MCM4', 'CLSPN', 'TOPBP1', 'MCM6', 'MCM2']	Reactome Pathways	8.15677	downregulated
Mitotic Prometaphase Homo sapiens R-HSA-68877	7.05077	130.015	1.28849e-06	9.81085e-09	['ERCC6L', 'AHCTF1', 'NUP107', 'NCAPG', 'SMC3', 'SMC4', 'SKA1', 'SMC2', 'CLIP1', 'STAG2', 'CENPI', 'TAOK1', 'NUF2', 'CENPK', 'KNTC1', 'SPDL1']	Reactome Pathways	8.00829	downregulated
Activation of ATR in response to replication stress Homo sapiens R-HSA-176187	14.7188	263.701	1.86491e-06	1.65664e-08	['RFC3', 'CDC45', 'DBF4', 'MCM8', 'RFC2', 'MCM4', 'CLSPN', 'CDC6', 'MCM6', 'MCM2']	Reactome Pathways	7.78077	downregulated
SUMOylation Homo sapiens R-HSA-2990846	6.98178	120.65	2.57132e-06	3.12665e-08	['NUP205', 'NOP58', 'NUP107', 'NUP188', 'NUP155', 'SMC5', 'SMC6', 'BRCA1', 'SMC3', 'PIAS1', 'WRN', 'STAG2', 'TPR', 'UBA2', 'NUP54']	Reactome Pathways	7.50492	downregulated
Activation of the pre-replicative complex Homo sapiens R-HSA-68962	17.0023	293.51	2.57132e-06	3.1828e-08	['POLA1', 'CDC45', 'DBF4', 'MCM8', 'POLE2', 'MCM4', 'CDC6', 'MCM6', 'MCM2']	Reactome Pathways	7.49719	downregulated
Cell Cycle Checkpoints Homo sapiens R-HSA-69620	4.97377	85.7378	2.57132e-06	3.2631e-08	['RFC3', 'MCM8', 'RFC2', 'RMI1', 'CDC6', 'BRCA1', 'WRN', 'DBF4', 'CDC45', 'CCNE2', 'PSMD5', 'EXO1', 'PSME4', 'FAM175A', 'RBBP8', 'MCM4', 'CLSPN', 'TOPBP1', 'MCM6', 'MCM2']	Reactome Pathways	7.48637	downregulated
SUMOylation of DNA damage response and repair proteins Homo sapiens R-HSA-3108214	8.36901	142.711	2.81443e-06	3.92878e-08	['NUP205', 'NUP107', 'NUP188', 'NUP155', 'SMC5', 'BRCA1', 'SMC6', 'SMC3', 'PIAS1', 'WRN', 'STAG2', 'TPR', 'NUP54']	Reactome Pathways	7.40574	downregulated
Mitotic G1-G1/S phases Homo sapiens R-HSA-453279	5.73233	96.0453	3.4732e-06	5.28914e-08	['LIN54', 'RRM2', 'MCM8', 'CDC6', 'POLA1', 'TFDP1', 'RBL1', 'DBF4', 'CDC45', 'CCNE2', 'PSMD5', 'POLE2', 'MCM4', 'MYBL2', 'FBXO5', 'MCM6', 'MCM2']	Reactome Pathways	7.27662	downregulated
S Phase Homo sapiens R-HSA-69242	5.93572	96.7616	5.04545e-06	8.32372e-08	['RFC3', 'MCM8', 'RFC2', 'ESCO2', 'CDC6', 'SMC3', 'POLA1', 'STAG2', 'CDC45', 'CCNE2', 'PSMD5', 'POLE2', 'PSME4', 'MCM4', 'MCM6', 'MCM2']	Reactome Pathways	7.07968	downregulated
SUMO E3 ligases SUMOylate target proteins Homo sapiens R-HSA-3108232	6.82154	109.057	6.41604e-06	1.13991e-07	['NUP205', 'NOP58', 'NUP107', 'NUP188', 'NUP155', 'SMC5', 'BRCA1', 'SMC6', 'SMC3', 'PIAS1', 'WRN', 'STAG2', 'TPR', 'NUP54']	Reactome Pathways	6.94313	downregulated
DNA Double-Strand Break Repair Homo sapiens R-HSA-5693532	5.3268	84.1908	7.18377e-06	1.36747e-07	['POLQ', 'TIPIN', 'RFC3', 'PAXIP1', 'RIF1', 'RFC2', 'RMI1', 'PARP2', 'XRCC2', 'BRCA1', 'WRN', 'EXO1', 'POLE2', 'FAM175A', 'RBBP8', 'CLSPN', 'TOPBP1']	Reactome Pathways	6.86408	downregulated
Homology Directed Repair Homo sapiens R-HSA-5693538	5.82434	88.3657	1.26877e-05	2.57618e-07	['POLQ', 'TIPIN', 'RFC3', 'RFC2', 'RMI1', 'PARP2', 'XRCC2', 'BRCA1', 'WRN', 'EXO1', 'POLE2', 'FAM175A', 'RBBP8', 'CLSPN', 'TOPBP1']	Reactome Pathways	6.58902	downregulated
Regulation of TP53 Activity through Phosphorylation Homo sapiens R-HSA-6804756	6.82244	102.087	1.47086e-05	3.17318e-07	['RFC3', 'RFC2', 'RMI1', 'BRCA1', 'HIPK2', 'WRN', 'EXO1', 'RBBP8', 'TAF4B', 'TOPBP1', 'TAF9B', 'TAF3', 'TAF2']	Reactome Pathways	6.4985	downregulated
Presynaptic phase of homologous DNA pairing and strand exchange Homo sapiens R-HSA-5693616	11.8961	175.678	1.68945e-05	3.85915e-07	['WRN', 'RFC3', 'EXO1', 'RFC2', 'RMI1', 'XRCC2', 'RBBP8', 'BRCA1', 'TOPBP1']	Reactome Pathways	6.41351	downregulated
Homologous DNA Pairing and Strand Exchange Homo sapiens R-HSA-5693579	10.813	152.359	3.13057e-05	7.59658e-07	['WRN', 'RFC3', 'EXO1', 'RFC2', 'RMI1', 'XRCC2', 'RBBP8', 'BRCA1', 'TOPBP1']	Reactome Pathways	6.11938	downregulated
G1/S Transition Homo sapiens R-HSA-69206	5.70312	80.103	3.13057e-05	7.94561e-07	['RRM2', 'MCM8', 'CDC6', 'POLA1', 'TFDP1', 'DBF4', 'CDC45', 'CCNE2', 'PSMD5', 'POLE2', 'MCM4', 'FBXO5', 'MCM6', 'MCM2']	Reactome Pathways	6.09987	downregulated
DNA strand elongation Homo sapiens R-HSA-69190	13.1951	183.765	3.35742e-05	8.94745e-07	['POLA1', 'RFC3', 'CDC45', 'MCM8', 'RFC2', 'MCM4', 'MCM6', 'MCM2']	Reactome Pathways	6.0483	downregulated
Resolution of Sister Chromatid Cohesion Homo sapiens R-HSA-2500257	6.02603	82.6108	3.98434e-05	1.11238e-06	['ERCC6L', 'AHCTF1', 'NUP107', 'SMC3', 'SKA1', 'CLIP1', 'STAG2', 'CENPI', 'TAOK1', 'NUF2', 'CENPK', 'KNTC1', 'SPDL1']	Reactome Pathways	5.95375	downregulated
Mitotic Metaphase and Anaphase Homo sapiens R-HSA-2555396	4.33637	57.2548	6.31881e-05	1.84432e-06	['ERCC6L', 'AHCTF1', 'NUP107', 'VRK1', 'SMC3', 'SKA1', 'CLIP1', 'STAG2', 'PSMD5', 'CENPI', 'TAOK1', 'PSME4', 'NUF2', 'CENPK', 'KNTC1', 'FBXO5', 'SPDL1']	Reactome Pathways	5.73416	downregulated
DNA Replication Homo sapiens R-HSA-69306	5.63128	73.3825	7.19333e-05	2.19086e-06	['RFC3', 'MCM8', 'RFC2', 'CDC6', 'POLA1', 'DBF4', 'CDC45', 'PSMD5', 'POLE2', 'PSME4', 'MCM4', 'MCM6', 'MCM2']	Reactome Pathways	5.65939	downregulated
G1/S-Specific Transcription Homo sapiens R-HSA-69205	21.519	279.191	7.31097e-05	2.31947e-06	['POLA1', 'RRM2', 'TFDP1', 'CDC45', 'CDC6', 'FBXO5']	Reactome Pathways	5.63461	downregulated
Transcriptional Regulation by TP53 Homo sapiens R-HSA-3700989	3.12482	40.2364	7.75169e-05	2.55767e-06	['BRCA1', 'WRN', 'EXO1', 'RBBP8', 'CASP2', 'TOPBP1', 'TAF9B', 'E2F7', 'USP7', 'RFC3', 'CNOT6L', 'APAF1', 'RMI1', 'RFC2', 'HIPK2', 'TFDP1', 'RBL1', 'CCNE2', 'MSH2', 'FANCD2', 'CENPJ', 'TAF4B', 'CDK12', 'TAF3', 'TAF2']	Reactome Pathways	5.59216	downregulated
HDR through Single Strand Annealing (SSA) Homo sapiens R-HSA-5685938	10.9173	139.045	8.58786e-05	2.94254e-06	['WRN', 'RFC3', 'EXO1', 'RFC2', 'RMI1', 'RBBP8', 'BRCA1', 'TOPBP1']	Reactome Pathways	5.53128	downregulated
HDR through Homologous Recombination (HRR) Homo sapiens R-HSA-5685942	7.34921	91.4637	0.000110767	3.93587e-06	['RFC3', 'WRN', 'EXO1', 'RFC2', 'RMI1', 'XRCC2', 'POLE2', 'RBBP8', 'BRCA1', 'TOPBP1']	Reactome Pathways	5.40496	downregulated
NS1 Mediated Effects on Host Pathways Homo sapiens R-HSA-168276	10.2119	125.751	0.000119478	4.48768e-06	['NUP205', 'NUP107', 'NUP188', 'NUP155', 'TPR', 'KPNA4', 'NUP54', 'KPNB1']	Reactome Pathways	5.34798	downregulated
HDR through Homologous Recombination (HR) or Single Strand Annealing (SSA) Homo sapiens R-HSA-5693567	5.23122	64.3476	0.000119478	4.54867e-06	['TIPIN', 'RFC3', 'RFC2', 'RMI1', 'XRCC2', 'BRCA1', 'WRN', 'EXO1', 'POLE2', 'FAM175A', 'RBBP8', 'CLSPN', 'TOPBP1']	Reactome Pathways	5.34212	downregulated
Processing of DNA double-strand break ends Homo sapiens R-HSA-5693607	6.24394	75.8023	0.000133514	5.34078e-06	['RFC3', 'TIPIN', 'WRN', 'EXO1', 'RFC2', 'RMI1', 'FAM175A', 'RBBP8', 'BRCA1', 'TOPBP1', 'CLSPN']	Reactome Pathways	5.2724	downregulated
Synthesis of DNA Homo sapiens R-HSA-69239	5.61668	68.1027	0.000133514	5.42187e-06	['POLA1', 'RFC3', 'CDC45', 'PSMD5', 'MCM8', 'RFC2', 'POLE2', 'PSME4', 'MCM4', 'CDC6', 'MCM6', 'MCM2']	Reactome Pathways	5.26585	downregulated
DNA Replication Pre-Initiation Homo sapiens R-HSA-69002	6.15568	73.9824	0.000139782	6.0312e-06	['POLA1', 'DBF4', 'CDC45', 'MCM8', 'PSMD5', 'POLE2', 'PSME4', 'MCM4', 'MCM6', 'CDC6', 'MCM2']	Reactome Pathways	5.2196	downregulated
M/G1 Transition Homo sapiens R-HSA-68874	6.15568	73.9824	0.000139782	6.0312e-06	['POLA1', 'DBF4', 'CDC45', 'MCM8', 'PSMD5', 'POLE2', 'PSME4', 'MCM4', 'MCM6', 'CDC6', 'MCM2']	Reactome Pathways	5.2196	downregulated
Unwinding of DNA Homo sapiens R-HSA-176974	28.1284	335.717	0.000146006	6.55595e-06	['CDC45', 'MCM8', 'MCM4', 'MCM6', 'MCM2']	Reactome Pathways	5.18336	downregulated
Host Interactions with Influenza Factors Homo sapiens R-HSA-168253	9.59202	114.316	0.000146006	6.6703e-06	['NUP205', 'NUP107', 'NUP188', 'NUP155', 'TPR', 'KPNA4', 'NUP54', 'KPNB1']	Reactome Pathways	5.17585	downregulated
Transport of Ribonucleoproteins into the Host Nucleus Homo sapiens R-HSA-168271	12.0239	142.326	0.000154039	7.23279e-06	['NUP205', 'NUP107', 'NUP188', 'NUP155', 'TPR', 'NUP54', 'KPNB1']	Reactome Pathways	5.14069	downregulated
Mitotic Anaphase Homo sapiens R-HSA-68882	4.07285	48.0609	0.000155574	7.50232e-06	['ERCC6L', 'AHCTF1', 'NUP107', 'VRK1', 'SMC3', 'SKA1', 'CLIP1', 'STAG2', 'PSMD5', 'CENPI', 'TAOK1', 'PSME4', 'NUF2', 'CENPK', 'KNTC1', 'SPDL1']	Reactome Pathways	5.1248	downregulated
Nuclear import of Rev protein Homo sapiens R-HSA-180746	11.0609	125.843	0.000231382	1.14516e-05	['NUP205', 'NUP107', 'NUP188', 'NUP155', 'TPR', 'NUP54', 'KPNB1']	Reactome Pathways	4.94113	downregulated
Separation of Sister Chromatids Homo sapiens R-HSA-2467813	4.07174	45.451	0.000273373	1.41962e-05	['ERCC6L', 'AHCTF1', 'NUP107', 'SMC3', 'SKA1', 'CLIP1', 'STAG2', 'PSMD5', 'CENPI', 'TAOK1', 'PSME4', 'NUF2', 'CENPK', 'KNTC1', 'SPDL1']	Reactome Pathways	4.84783	downregulated
E2F mediated regulation of DNA replication Homo sapiens R-HSA-113510	10.6349	118.692	0.000273373	1.42237e-05	['POLA1', 'CDC45', 'RRM2', 'TFDP1', 'MCM8', 'FBXO5', 'CDC6']	Reactome Pathways	4.84699	downregulated
Signaling by Rho GTPases Homo sapiens R-HSA-194315	2.81603	30.5349	0.000366543	1.95365e-05	['ARHGAP11A', 'NCKAP1', 'AHCTF1', 'ERCC6L', 'NUP107', 'ARHGAP18', 'ARAP3', 'IQGAP1', 'SKA1', 'TIAM1', 'DEPDC7', 'PAK1', 'CLIP1', 'CENPI', 'DLC1', 'TAOK1', 'NUF2', 'CENPK', 'PKN2', 'KNTC1', 'SPDL1', 'ECT2', 'PAK2', 'SRGAP1']	Reactome Pathways	4.70915	downregulated
Gene Expression Homo sapiens R-HSA-74160	1.80641	19.5114	0.000373381	2.03749e-05	['NUP107', 'NUP188', 'ICE1', 'ICE2', 'ZC3H8', 'PHAX', 'BRCA1', 'CCAR1', 'PSMD5', 'EXO1', 'CASP2', 'ZNF721', 'TOPBP1', 'JARID2', 'MYBL1', 'UTP15', 'ZNF440', 'USP7', 'RFC3', 'CNOT6L', 'APAF1', 'RMI1', 'RFC2', 'THOC2', 'SIRT1', 'THOC7', 'TFDP1', 'ZNF92', 'RBL1', 'MSH2', 'CCNE2', 'FANCD2', 'PSME4', 'TFAM', 'NUP54', 'BDP1', 'NUP205', 'RNMT', 'UHRF1', 'DDX21', 'RPAP2', 'ZNF709', 'WRN', 'TAF1B', 'TPR', …	Reactome Pathways	4.69091	downregulated
Interactions of Rev with host cellular proteins Homo sapiens R-HSA-177243	9.87424	106.15	0.000384001	2.14417e-05	['NUP205', 'NUP107', 'NUP188', 'NUP155', 'TPR', 'NUP54', 'KPNB1']	Reactome Pathways	4.66874	downregulated
Regulation of TP53 Activity Homo sapiens R-HSA-5633007	4.0714	42.8473	0.000470775	2.68844e-05	['USP7', 'RFC3', 'RFC2', 'RMI1', 'BRCA1', 'HIPK2', 'WRN', 'EXO1', 'RBBP8', 'TAF4B', 'TOPBP1', 'TAF9B', 'TAF3', 'TAF2']	Reactome Pathways	4.5705	downregulated
G0 and Early G1 Homo sapiens R-HSA-1538133	12.4532	130.552	0.000479619	2.7998e-05	['LIN54', 'RBL1', 'TFDP1', 'CCNE2', 'MYBL2', 'CDC6']	Reactome Pathways	4.55287	downregulated
Resolution of D-loop Structures through Synthesis-Dependent Strand Annealing (SDSA) Homo sapiens R-HSA-5693554	11.83	121.165	0.00059742	3.56329e-05	['WRN', 'EXO1', 'RMI1', 'XRCC2', 'RBBP8', 'BRCA1']	Reactome Pathways	4.44815	downregulated
Loss of Nlp from mitotic centrosomes Homo sapiens R-HSA-380259	5.9389	58.4579	0.000854035	5.31062e-05	['PLK4', 'PCM1', 'CENPJ', 'ALMS1', 'CCP110', 'HAUS6', 'TUBA4A', 'CDK5RAP2', 'CEP78']	Reactome Pathways	4.27485	downregulated
Loss of proteins required for interphase microtubule organization?from the centrosome Homo sapiens R-HSA-380284	5.9389	58.4579	0.000854035	5.31062e-05	['PLK4', 'PCM1', 'CENPJ', 'ALMS1', 'CCP110', 'HAUS6', 'TUBA4A', 'CDK5RAP2', 'CEP78']	Reactome Pathways	4.27485	downregulated
AURKA Activation by TPX2 Homo sapiens R-HSA-8854518	5.65522	53.7399	0.00117648	7.46495e-05	['PLK4', 'PCM1', 'CENPJ', 'ALMS1', 'CCP110', 'HAUS6', 'TUBA4A', 'CDK5RAP2', 'CEP78']	Reactome Pathways	4.12697	downregulated
NEP/NS2 Interacts with the Cellular Export Machinery Homo sapiens R-HSA-168333	9.85628	92.4483	0.00127938	8.44259e-05	['NUP205', 'NUP107', 'NUP188', 'NUP155', 'TPR', 'NUP54']	Reactome Pathways	4.07352	downregulated
Regulation of Glucokinase by Glucokinase Regulatory Protein Homo sapiens R-HSA-170822	9.85628	92.4483	0.00127938	8.44259e-05	['NUP205', 'NUP107', 'NUP188', 'NUP155', 'TPR', 'NUP54']	Reactome Pathways	4.07352	downregulated
Export of Viral Ribonucleoproteins from Nucleus Homo sapiens R-HSA-168274	9.46154	86.9109	0.00152387	0.000102494	['NUP205', 'NUP107', 'NUP188', 'NUP155', 'TPR', 'NUP54']	Reactome Pathways	3.9893	downregulated
SUMOylation of RNA binding proteins Homo sapiens R-HSA-4570464	7.27202	65.8599	0.00170173	0.000116616	['NUP205', 'NOP58', 'NUP107', 'NUP188', 'NUP155', 'TPR', 'NUP54']	Reactome Pathways	3.93324	downregulated
Vpr-mediated nuclear import of PICs Homo sapiens R-HSA-180910	9.09717	81.8676	0.00173788	0.000123504	['NUP205', 'NUP107', 'NUP188', 'NUP155', 'TPR', 'NUP54']	Reactome Pathways	3.90832	downregulated
Resolution of D-loop Structures through Holliday Junction Intermediates Homo sapiens R-HSA-5693568	9.09717	81.8676	0.00173788	0.000123504	['WRN', 'EXO1', 'RMI1', 'XRCC2', 'RBBP8', 'BRCA1']	Reactome Pathways	3.90832	downregulated
RHO GTPases Activate Formins Homo sapiens R-HSA-5663220	4.23625	37.7358	0.00187081	0.000135325	['ERCC6L', 'CLIP1', 'AHCTF1', 'NUP107', 'CENPI', 'TAOK1', 'NUF2', 'CENPK', 'KNTC1', 'SPDL1', 'SKA1']	Reactome Pathways	3.86862	downregulated
G2/M DNA damage checkpoint Homo sapiens R-HSA-69473	5.16187	45.8008	0.00190389	0.000140134	['RFC3', 'WRN', 'EXO1', 'RFC2', 'RMI1', 'FAM175A', 'RBBP8', 'BRCA1', 'TOPBP1']	Reactome Pathways	3.85346	downregulated
Transport of the SLBP independent Mature mRNA Homo sapiens R-HSA-159227	8.75978	77.2589	0.00190914	0.000147789	['NUP205', 'NUP107', 'NUP188', 'NUP155', 'TPR', 'NUP54']	Reactome Pathways	3.83036	downregulated
Rev-mediated nuclear export of HIV RNA Homo sapiens R-HSA-165054	8.75978	77.2589	0.00190914	0.000147789	['NUP205', 'NUP107', 'NUP188', 'NUP155', 'TPR', 'NUP54']	Reactome Pathways	3.83036	downregulated
Resolution of D-Loop Structures Homo sapiens R-HSA-5693537	8.75978	77.2589	0.00190914	0.000147789	['WRN', 'EXO1', 'RMI1', 'XRCC2', 'RBBP8', 'BRCA1']	Reactome Pathways	3.83036	downregulated
Recruitment of mitotic centrosome proteins and complexes Homo sapiens R-HSA-380270	5.08787	44.6408	0.0019298	0.000154707	['PLK4', 'PCM1', 'CENPJ', 'ALMS1', 'CCP110', 'HAUS6', 'TUBA4A', 'CDK5RAP2', 'CEP78']	Reactome Pathways	3.81049	downregulated
Centrosome maturation Homo sapiens R-HSA-380287	5.08787	44.6408	0.0019298	0.000154707	['PLK4', 'PCM1', 'CENPJ', 'ALMS1', 'CCP110', 'HAUS6', 'TUBA4A', 'CDK5RAP2', 'CEP78']	Reactome Pathways	3.81049	downregulated
Anchoring of the basal body to the plasma membrane Homo sapiens R-HSA-5620912	4.55384	39.8959	0.0019298	0.000156735	['PLK4', 'PCM1', 'CENPJ', 'ALMS1', 'CCP110', 'CEP83', 'HAUS6', 'TUBA4A', 'CDK5RAP2', 'CEP78']	Reactome Pathways	3.80483	downregulated
Regulation of HSF1-mediated heat shock response Homo sapiens R-HSA-3371453	5.01595	43.5216	0.00205551	0.000170522	['DNAJC2', 'NUP205', 'NUP107', 'NUP188', 'NUP155', 'TPR', 'NUP54', 'HSPA14', 'SIRT1']	Reactome Pathways	3.76822	downregulated
Transport of the SLBP Dependant Mature mRNA Homo sapiens R-HSA-159230	8.4465	73.0345	0.00205551	0.000175702	['NUP205', 'NUP107', 'NUP188', 'NUP155', 'TPR', 'NUP54']	Reactome Pathways	3.75522	downregulated
Nuclear Pore Complex (NPC) Disassembly Homo sapiens R-HSA-3301854	8.4465	73.0345	0.00205551	0.000175702	['NUP205', 'NUP107', 'NUP188', 'NUP155', 'TPR', 'NUP54']	Reactome Pathways	3.75522	downregulated
Hexose transport Homo sapiens R-HSA-189200	6.73888	58.2052	0.00205551	0.000177379	['NUP205', 'NUP107', 'SLC5A9', 'NUP188', 'NUP155', 'TPR', 'NUP54']	Reactome Pathways	3.7511	downregulated
Interactions of Vpr with host cellular proteins Homo sapiens R-HSA-176033	8.15482	69.1514	0.00237106	0.000207618	['NUP205', 'NUP107', 'NUP188', 'NUP155', 'TPR', 'NUP54']	Reactome Pathways	3.68274	downregulated
snRNP Assembly Homo sapiens R-HSA-191859	6.42478	53.8092	0.00255824	0.000230501	['NUP205', 'NUP107', 'NUP188', 'NUP155', 'TPR', 'PHAX', 'NUP54']	Reactome Pathways	3.63733	downregulated
Metabolism of non-coding RNA Homo sapiens R-HSA-194441	6.42478	53.8092	0.00255824	0.000230501	['NUP205', 'NUP107', 'NUP188', 'NUP155', 'TPR', 'PHAX', 'NUP54']	Reactome Pathways	3.63733	downregulated
Nuclear Envelope Breakdown Homo sapiens R-HSA-2980766	6.27844	51.7916	0.00286187	0.000261491	['NUP205', 'NUP107', 'NUP188', 'NUP155', 'TPR', 'VRK1', 'NUP54']	Reactome Pathways	3.58254	downregulated
Transport of Mature mRNA Derived from an Intronless Transcript Homo sapiens R-HSA-159231	7.62792	62.2653	0.00304638	0.00028506	['NUP205', 'NUP107', 'NUP188', 'NUP155', 'TPR', 'NUP54']	Reactome Pathways	3.54506	downregulated
Transport of Mature mRNA derived from an Intron-Containing Transcript Homo sapiens R-HSA-159236	5.26829	42.9852	0.00304638	0.000286081	['NUP205', 'NUP107', 'NUP188', 'NUP155', 'TPR', 'NUP54', 'THOC2', 'THOC7']	Reactome Pathways	3.54351	downregulated
Regulation of PLK1 Activity at G2/M Transition Homo sapiens R-HSA-2565942	4.56415	36.6811	0.00339733	0.00032335	['PLK4', 'PCM1', 'CENPJ', 'ALMS1', 'CCP110', 'HAUS6', 'TUBA4A', 'CDK5RAP2', 'CEP78']	Reactome Pathways	3.49033	downregulated
Transport of Mature mRNAs Derived from Intronless Transcripts Homo sapiens R-HSA-159234	7.38917	59.2026	0.00343648	0.000331437	['NUP205', 'NUP107', 'NUP188', 'NUP155', 'TPR', 'NUP54']	Reactome Pathways	3.4796	downregulated
Mitotic Prophase Homo sapiens R-HSA-68875	4.08226	32.4751	0.00359042	0.00035084	['NUP205', 'NUP107', 'NUP188', 'NUP155', 'TPR', 'VRK1', 'NUP54', 'NCAPD3', 'SMC4', 'SMC2']	Reactome Pathways	3.45489	downregulated
Late Phase of HIV Life Cycle Homo sapiens R-HSA-162599	3.72665	29.4033	0.00378312	0.000374472	['NUP205', 'NUP107', 'NUP188', 'NUP155', 'RNMT', 'TPR', 'TAF4B', 'NUP54', 'TAF9B', 'TAF3', 'TAF2']	Reactome Pathways	3.42658	downregulated
G2/M Transition Homo sapiens R-HSA-69275	3.22664	25.0537	0.00413093	0.000424486	['PLK4', 'LIN54', 'CCP110', 'HAUS6', 'TUBA4A', 'PCM1', 'PSMD5', 'CENPJ', 'PSME4', 'ALMS1', 'MYBL2', 'CDK5RAP2', 'CEP78']	Reactome Pathways	3.37214	downregulated
Antiviral mechanism by IFN-stimulated genes Homo sapiens R-HSA-1169410	4.93801	38.3402	0.00413093	0.000424626	['NUP205', 'NUP107', 'NUP188', 'NUP155', 'TPR', 'KPNA4', 'NUP54', 'KPNB1']	Reactome Pathways	3.37199	downregulated
ISG15 antiviral mechanism Homo sapiens R-HSA-1169408	4.93801	38.3402	0.00413093	0.000424626	['NUP205', 'NUP107', 'NUP188', 'NUP155', 'TPR', 'KPNA4', 'NUP54', 'KPNB1']	Reactome Pathways	3.37199	downregulated
Mitotic G2-G2/M phases Homo sapiens R-HSA-453274	3.18648	24.3918	0.00455287	0.000473776	['PLK4', 'LIN54', 'CCP110', 'HAUS6', 'TUBA4A', 'PCM1', 'PSMD5', 'CENPJ', 'PSME4', 'ALMS1', 'MYBL2', 'CDK5RAP2', 'CEP78']	Reactome Pathways	3.32443	downregulated
HIV Infection Homo sapiens R-HSA-162906	2.88256	21.9506	0.00468077	0.000493025	['NUP205', 'NUP107', 'NUP188', 'NUP155', 'RNMT', 'PSMD5', 'PSME4', 'TPR', 'TAF4B', 'NUP54', 'TAF9B', 'PAK2', 'TAF3', 'KPNB1', 'TAF2']	Reactome Pathways	3.30713	downregulated
Transport of Mature Transcript to Cytoplasm Homo sapiens R-HSA-72202	4.78788	36.2791	0.00480263	0.000511956	['NUP205', 'NUP107', 'NUP188', 'NUP155', 'TPR', 'NUP54', 'THOC2', 'THOC7']	Reactome Pathways	3.29077	downregulated
Viral Messenger RNA Synthesis Homo sapiens R-HSA-168325	6.5668	48.952	0.00529392	0.000578849	['NUP205', 'NUP107', 'NUP188', 'NUP155', 'TPR', 'NUP54']	Reactome Pathways	3.23743	downregulated
Glucose transport Homo sapiens R-HSA-70153	6.5668	48.952	0.00529392	0.000578849	['NUP205', 'NUP107', 'NUP188', 'NUP155', 'TPR', 'NUP54']	Reactome Pathways	3.23743	downregulated
Recognition of DNA damage by PCNA-containing replication complex Homo sapiens R-HSA-110314	8.5538	63.6812	0.00529392	0.000584481	['RFC3', 'RFC2', 'POLE2', 'USP1', 'DTL']	Reactome Pathways	3.23323	downregulated
Cellular response to heat stress Homo sapiens R-HSA-3371556	4.0901	29.8861	0.00599943	0.00067087	['DNAJC2', 'NUP205', 'NUP107', 'NUP188', 'NUP155', 'TPR', 'NUP54', 'HSPA14', 'SIRT1']	Reactome Pathways	3.17336	downregulated
Generic Transcription Pathway Homo sapiens R-HSA-212436	1.87207	13.6604	0.00599943	0.0006776	['BRCA1', 'ZNF709', 'WRN', 'EXO1', 'RBBP8', 'CASP2', 'ZNF227', 'ZNF721', 'TOPBP1', 'TAF9B', 'ZNF268', 'E2F7', 'ZNF440', 'USP7', 'RFC3', 'CNOT6L', 'ZNF141', 'SMAD3', 'APAF1', 'SMURF2', 'RMI1', 'RFC2', 'HIPK2', 'TFDP1', 'ZNF92', 'RBL1', 'MSH2', 'CCNE2', 'FANCD2', 'CENPJ', 'TAF4B', 'CDK12', 'ZNF655', 'MAMLD1', 'TAF3', 'TAF2']	Reactome Pathways	3.16903	downregulated
RHO GTPase Effectors Homo sapiens R-HSA-195258	2.66413	19.2513	0.00636828	0.000727341	['NCKAP1', 'AHCTF1', 'ERCC6L', 'NUP107', 'IQGAP1', 'SKA1', 'PAK1', 'CLIP1', 'CENPI', 'TAOK1', 'NUF2', 'CENPK', 'PKN2', 'KNTC1', 'SPDL1', 'PAK2']	Reactome Pathways	3.13826	downregulated
SUMOylation of DNA replication proteins Homo sapiens R-HSA-4615885	6.22054	44.786	0.00646693	0.000746815	['NUP205', 'NUP107', 'NUP188', 'NUP155', 'TPR', 'NUP54']	Reactome Pathways	3.12679	downregulated
HIV Life Cycle Homo sapiens R-HSA-162587	3.35174	23.7083	0.00725738	0.000847309	['NUP205', 'NUP107', 'NUP188', 'NUP155', 'RNMT', 'TPR', 'TAF4B', 'NUP54', 'TAF9B', 'TAF3', 'TAF2']	Reactome Pathways	3.07196	downregulated
DNA Damage Bypass Homo sapiens R-HSA-73893	5.90891	41.1195	0.00805067	0.000950143	['RFC3', 'RFC2', 'POLE2', 'USP1', 'REV1', 'DTL']	Reactome Pathways	3.02221	downregulated
TP53 Regulates Transcription of Cell Cycle Genes Homo sapiens R-HSA-6791312	5.62695	37.874	0.0100056	0.00119356	['CNOT6L', 'RBL1', 'TFDP1', 'CCNE2', 'CENPJ', 'E2F7']	Reactome Pathways	2.92316	downregulated
Assembly of the pre-replicative complex Homo sapiens R-HSA-68867	4.60041	30.2496	0.0115648	0.00139423	['MCM8', 'PSMD5', 'PSME4', 'MCM4', 'MCM6', 'CDC6', 'MCM2']	Reactome Pathways	2.85567	downregulated
Host Interactions of HIV factors Homo sapiens R-HSA-162909	3.32379	21.5892	0.0123982	0.00151044	['NUP205', 'NUP107', 'NUP188', 'NUP155', 'PSMD5', 'PSME4', 'TPR', 'NUP54', 'PAK2', 'KPNB1']	Reactome Pathways	2.8209	downregulated
HDR through MMEJ (alt-NHEJ) Homo sapiens R-HSA-5685939	16.8091	107.852	0.0130122	0.00163478	['POLQ', 'PARP2', 'RBBP8']	Reactome Pathways	2.78654	downregulated
eNOS activation Homo sapiens R-HSA-203615	16.8091	107.852	0.0130122	0.00163478	['LYPLA1', 'DDAH1', 'ZDHHC21']	Reactome Pathways	2.78654	downregulated
Establishment of Sister Chromatid Cohesion Homo sapiens R-HSA-2468052	16.8091	107.852	0.0130122	0.00163478	['STAG2', 'ESCO2', 'SMC3']	Reactome Pathways	2.78654	downregulated
Fanconi Anemia Pathway Homo sapiens R-HSA-6783310	6.55556	41.9133	0.0131777	0.0016723	['DCLRE1B', 'FANCD2', 'UBE2T', 'USP1', 'FANCB']	Reactome Pathways	2.77669	downregulated
Switching of origins to a post-replicative state Homo sapiens R-HSA-69052	4.38066	27.6791	0.0139268	0.00180271	['MCM8', 'PSMD5', 'PSME4', 'MCM4', 'MCM6', 'CDC6', 'MCM2']	Reactome Pathways	2.74407	downregulated
Orc1 removal from chromatin Homo sapiens R-HSA-68949	4.38066	27.6791	0.0139268	0.00180271	['MCM8', 'PSMD5', 'PSME4', 'MCM4', 'MCM6', 'CDC6', 'MCM2']	Reactome Pathways	2.74407	downregulated
Signaling by FGFR3 point mutants in cancer Homo sapiens R-HSA-8853338	8.72849	54.3595	0.0146728	0.00197375	['PIK3CA', 'FRS2', 'FGF2', 'FGF23']	Reactome Pathways	2.70471	downregulated
Telomere C-strand (Lagging Strand) Synthesis Homo sapiens R-HSA-174417	8.72849	54.3595	0.0146728	0.00197375	['POLA1', 'RFC3', 'RFC2', 'POLE2']	Reactome Pathways	2.70471	downregulated
Resolution of AP sites via the multiple-nucleotide patch replacement pathway Homo sapiens R-HSA-110373	8.72849	54.3595	0.0146728	0.00197375	['RFC3', 'RFC2', 'PARP2', 'POLE2']	Reactome Pathways	2.70471	downregulated
Signaling by FGFR3 in disease Homo sapiens R-HSA-5655332	8.72849	54.3595	0.0146728	0.00197375	['PIK3CA', 'FRS2', 'FGF2', 'FGF23']	Reactome Pathways	2.70471	downregulated
Removal of licensing factors from origins Homo sapiens R-HSA-69300	4.24544	26.1308	0.0156333	0.00212279	['MCM8', 'PSMD5', 'PSME4', 'MCM4', 'MCM6', 'CDC6', 'MCM2']	Reactome Pathways	2.67309	downregulated
Condensation of Prometaphase Chromosomes Homo sapiens R-HSA-2514853	14.7072	89.956	0.0160977	0.00220629	['NCAPG', 'SMC4', 'SMC2']	Reactome Pathways	2.65634	downregulated
Regulation of DNA replication Homo sapiens R-HSA-69304	4.05751	24.0235	0.0192793	0.00268319	['MCM8', 'PSMD5', 'PSME4', 'MCM4', 'MCM6', 'CDC6', 'MCM2']	Reactome Pathways	2.57135	downregulated
Assembly of the primary cilium Homo sapiens R-HSA-5617833	2.71546	16.0694	0.0192793	0.00269127	['PLK4', 'PCM1', 'RP2', 'CENPJ', 'ALMS1', 'CCP110', 'CEP83', 'HAUS6', 'ASAP1', 'TUBA4A', 'CDK5RAP2', 'CEP78']	Reactome Pathways	2.57004	downregulated
tRNA processing in the nucleus Homo sapiens R-HSA-6784531	4.63182	27.0275	0.0207497	0.00292286	['NUP205', 'NUP107', 'NUP188', 'NUP155', 'TPR', 'NUP54']	Reactome Pathways	2.53419	downregulated
Downregulation of TGF-beta receptor signaling Homo sapiens R-HSA-2173788	7.14003	39.9262	0.0262292	0.003728	['SMAD3', 'SMURF2', 'UCHL5', 'TGFBR2']	Reactome Pathways	2.42852	downregulated
Polymerase switching Homo sapiens R-HSA-69091	10.6945	57.5477	0.0312689	0.00460303	['POLA1', 'RFC3', 'RFC2']	Reactome Pathways	2.33696	downregulated
Leading Strand Synthesis Homo sapiens R-HSA-69109	10.6945	57.5477	0.0312689	0.00460303	['POLA1', 'RFC3', 'RFC2']	Reactome Pathways	2.33696	downregulated
Mismatch repair (MMR) directed by MSH2:MSH6 (MutSalpha) Homo sapiens R-HSA-5358565	10.6945	57.5477	0.0312689	0.00460303	['MSH6', 'MSH2', 'EXO1']	Reactome Pathways	2.33696	downregulated
Polymerase switching on the C-strand of the telomere Homo sapiens R-HSA-174411	10.6945	57.5477	0.0312689	0.00460303	['POLA1', 'RFC3', 'RFC2']	Reactome Pathways	2.33696	downregulated
Extension of Telomeres Homo sapiens R-HSA-180786	6.54435	34.7944	0.0330616	0.0049089	['POLA1', 'RFC3', 'RFC2', 'POLE2']	Reactome Pathways	2.30902	downregulated
Mismatch Repair Homo sapiens R-HSA-5358508	9.80282	50.7438	0.0377173	0.00564802	['MSH6', 'MSH2', 'EXO1']	Reactome Pathways	2.2481	downregulated
Chromosome Maintenance Homo sapiens R-HSA-73886	3.49056	18.0057	0.0380817	0.00575092	['POLA1', 'RFC3', 'RFC2', 'CENPI', 'POLE2', 'CENPK', 'RSF1']	Reactome Pathways	2.24026	downregulated
Termination of translesion DNA synthesis Homo sapiens R-HSA-5656169	6.04032	30.5908	0.041485	0.00631751	['RFC3', 'RFC2', 'POLE2', 'REV1']	Reactome Pathways	2.19945	downregulated
Sema3A PAK dependent Axon repulsion Homo sapiens R-HSA-399954	9.04829	45.1269	0.044075	0.0068238	['PAK1', 'SEMA3A', 'PAK2']	Reactome Pathways	2.16597	downregulated
Translesion synthesis by REV1 Homo sapiens R-HSA-110312	9.04829	45.1269	0.044075	0.0068238	['RFC3', 'RFC2', 'REV1']	Reactome Pathways	2.16597	downregulated
Infectious disease Homo sapiens R-HSA-5663205	2.03832	10.137	0.0443391	0.00692096	['NUP205', 'NUP107', 'NUP188', 'NUP155', 'RNMT', 'IPO5', 'PSMD5', 'PSME4', 'TPR', 'TAF4B', 'KPNA4', 'NUP54', 'TAF9B', 'PAK2', 'TAF3', 'KPNB1', 'TAF2']	Reactome Pathways	2.15983	downregulated
TGF-beta receptor signaling activates SMADs Homo sapiens R-HSA-2173789	5.60829	27.0988	0.05047	0.0079712	['SMAD3', 'SMURF2', 'UCHL5', 'TGFBR2']	Reactome Pathways	2.09848	downregulated
Apoptosis Homo sapiens R-HSA-109581	2.58063	12.4527	0.05047	0.00802301	['PPP3R1', 'TFDP1', 'APAF1', 'APC', 'PSMD5', 'PSME4', 'CLSPN', 'DNM1L', 'PAK2', 'KPNB1']	Reactome Pathways	2.09566	downregulated
Translesion synthesis by POLI Homo sapiens R-HSA-5656121	8.40155	40.4256	0.05047	0.00813412	['RFC3', 'RFC2', 'REV1']	Reactome Pathways	2.08969	downregulated
Translesion synthesis by POLK Homo sapiens R-HSA-5655862	8.40155	40.4256	0.05047	0.00813412	['RFC3', 'RFC2', 'REV1']	Reactome Pathways	2.08969	downregulated
Apoptotic execution phase Homo sapiens R-HSA-75153	4.27185	20.2498	0.0526481	0.00873613	['APC', 'CLSPN', 'DNM1L', 'PAK2', 'KPNB1']	Reactome Pathways	2.05868	downregulated
Telomere C-strand synthesis initiation Homo sapiens R-HSA-174430	19.5743	92.7514	0.0526481	0.00875241	['POLA1', 'POLE2']	Reactome Pathways	2.05787	downregulated
DNA replication initiation Homo sapiens R-HSA-68952	19.5743	92.7514	0.0526481	0.00875241	['POLA1', 'POLE2']	Reactome Pathways	2.05787	downregulated
SMAD2/3 Phosphorylation Motif Mutants in Cancer Homo sapiens R-HSA-3304356	19.5743	92.7514	0.0526481	0.00875241	['SMAD3', 'TGFBR2']	Reactome Pathways	2.05787	downregulated
Programmed Cell Death Homo sapiens R-HSA-5357801	2.53061	11.9023	0.0541156	0.00906506	['PPP3R1', 'TFDP1', 'APAF1', 'APC', 'PSMD5', 'PSME4', 'CLSPN', 'DNM1L', 'PAK2', 'KPNB1']	Reactome Pathways	2.04263	downregulated
Transcriptional regulation by small RNAs Homo sapiens R-HSA-5578749	3.57637	16.7646	0.0545598	0.00920869	['NUP205', 'NUP107', 'NUP188', 'NUP155', 'TPR', 'NUP54']	Reactome Pathways	2.0358	downregulated
Signaling by TGF-beta Receptor Complex Homo sapiens R-HSA-170834	3.52281	16.2844	0.0577917	0.00982752	['RBL1', 'TFDP1', 'SMAD3', 'SMURF2', 'UCHL5', 'TGFBR2']	Reactome Pathways	2.00756	downregulated
Resolution of Abasic Sites (AP sites) Homo sapiens R-HSA-73933	5.06478	22.8665	0.0634209	0.0109457	['RFC3', 'RFC2', 'PARP2', 'POLE2']	Reactome Pathways	1.96076	downregulated
Base Excision Repair Homo sapiens R-HSA-73884	5.06478	22.8665	0.0634209	0.0109457	['RFC3', 'RFC2', 'PARP2', 'POLE2']	Reactome Pathways	1.96076	downregulated
PCNA-Dependent Long Patch Base Excision Repair Homo sapiens R-HSA-5651801	7.3506	33.0369	0.0642526	0.0111708	['RFC3', 'RFC2', 'POLE2']	Reactome Pathways	1.95192	downregulated
Rho GTPase cycle Homo sapiens R-HSA-194840	2.76508	12.3158	0.0664106	0.0116316	['ARHGAP11A', 'TIAM1', 'DEPDC7', 'DLC1', 'ARHGAP18', 'ARAP3', 'ECT2', 'SRGAP1']	Reactome Pathways	1.93436	downregulated
Influenza Infection Homo sapiens R-HSA-168254	2.57177	11.4309	0.0664106	0.01174	['NUP205', 'NUP107', 'NUP188', 'NUP155', 'TPR', 'KPNA4', 'NUP54', 'KPNB1', 'IPO5']	Reactome Pathways	1.93033	downregulated
TGFBR1 KD Mutants in Cancer Homo sapiens R-HSA-3656532	15.6586	69.1885	0.0664106	0.0120517	['SMAD3', 'TGFBR2']	Reactome Pathways	1.91895	downregulated
Loss of Function of SMAD2/3 in Cancer Homo sapiens R-HSA-3304349	15.6586	69.1885	0.0664106	0.0120517	['SMAD3', 'TGFBR2']	Reactome Pathways	1.91895	downregulated
SMAD2/3 MH2 Domain Mutants in Cancer Homo sapiens R-HSA-3315487	15.6586	69.1885	0.0664106	0.0120517	['SMAD3', 'TGFBR2']	Reactome Pathways	1.91895	downregulated
Loss of Function of TGFBR1 in Cancer Homo sapiens R-HSA-3656534	15.6586	69.1885	0.0664106	0.0120517	['SMAD3', 'TGFBR2']	Reactome Pathways	1.91895	downregulated
Post-translational protein modification Homo sapiens R-HSA-597592	1.75255	7.7248	0.0666658	0.0121826	['NUP205', 'NOP58', 'NUP107', 'NUP188', 'NUP155', 'SMC5', 'SMC6', 'BRCA1', 'SMC3', 'THBS1', 'THSD4', 'PIAS1', 'WRN', 'STAG2', 'TRAPPC6B', 'TPR', 'PPP6R3', 'PGM3', 'UBA2', 'NUP54', 'SEC22B', 'SEC22A']	Reactome Pathways	1.91426	downregulated
RNA polymerase II transcribes snRNA genes Homo sapiens R-HSA-6807505	3.32366	14.5379	0.0684745	0.0126	['ICE1', 'ICE2', 'ZC3H8', 'PHAX', 'RPRD1A', 'RPAP2']	Reactome Pathways	1.89963	downregulated
Metabolism of nitric oxide Homo sapiens R-HSA-202131	6.91786	30.0952	0.0686952	0.0129021	['LYPLA1', 'DDAH1', 'ZDHHC21']	Reactome Pathways	1.88934	downregulated
eNOS activation and regulation Homo sapiens R-HSA-203765	6.91786	30.0952	0.0686952	0.0129021	['LYPLA1', 'DDAH1', 'ZDHHC21']	Reactome Pathways	1.88934	downregulated
Lagging Strand Synthesis Homo sapiens R-HSA-69186	6.91786	30.0952	0.0686952	0.0129021	['POLA1', 'RFC3', 'RFC2']	Reactome Pathways	1.88934	downregulated
Translesion synthesis by Y family DNA polymerases bypasses lesions on DNA template Homo sapiens R-HSA-110313	4.75733	20.5593	0.0702252	0.0132786	['RFC3', 'RFC2', 'POLE2', 'REV1']	Reactome Pathways	1.87685	downregulated
Gene Silencing by RNA Homo sapiens R-HSA-211000	2.93129	12.6383	0.0704638	0.0134132	['NUP205', 'NUP107', 'NUP188', 'NUP155', 'TPR', 'NUP54', 'MYBL1']	Reactome Pathways	1.87247	downregulated
Antigen processing: Ubiquitination & Proteasome degradation Homo sapiens R-HSA-983168	2.08073	8.85158	0.0741361	0.0142063	['HACE1', 'SMURF2', 'UBA6', 'UBE2G1', 'SH3RF1', 'TRAIP', 'UBE2W', 'HECTD1', 'HECTD2', 'PSMD5', 'HECW2', 'PSME4', 'TRIM37']	Reactome Pathways	1.84752	downregulated
Signaling by FGFR1 in disease Homo sapiens R-HSA-5655302	4.61717	19.5299	0.0754548	0.0145547	['PIK3CA', 'FRS2', 'FGF2', 'FGF23']	Reactome Pathways	1.837	downregulated
Signaling by TGF-beta Receptor Complex in Cancer Homo sapiens R-HSA-3304351	13.0482	54.1165	0.081388	0.0158049	['SMAD3', 'TGFBR2']	Reactome Pathways	1.80121	downregulated
Dual Incision in GG-NER Homo sapiens R-HSA-5696400	4.48502	18.5728	0.081388	0.0159058	['RFC3', 'RFC2', 'PARP2', 'POLE2']	Reactome Pathways	1.79844	downregulated
Gap-filling DNA repair synthesis and ligation in GG-NER Homo sapiens R-HSA-5696397	5.87928	23.3112	0.0958142	0.0189683	['RFC3', 'RFC2', 'POLE2']	Reactome Pathways	1.72197	downregulated
SHC-mediated cascade:FGFR4 Homo sapiens R-HSA-5654719	5.87928	23.3112	0.0958142	0.0189683	['FRS2', 'FGF2', 'FGF23']	Reactome Pathways	1.72197	downregulated
Cohesin Loading onto Chromatin Homo sapiens R-HSA-2470946	11.1836	43.7575	0.100319	0.0199875	['STAG2', 'SMC3']	Reactome Pathways	1.69924	downregulated
Influenza Life Cycle Homo sapiens R-HSA-168255	2.46087	9.49494	0.105246	0.0211025	['NUP205', 'NUP107', 'NUP188', 'NUP155', 'TPR', 'NUP54', 'KPNB1', 'IPO5']	Reactome Pathways	1.67567	downregulated
Signaling by FGFR2 in disease Homo sapiens R-HSA-5655253	4.02419	15.344	0.109444	0.0220833	['PIK3CA', 'FRS2', 'FGF2', 'FGF23']	Reactome Pathways	1.65594	downregulated
ATF4 activates genes Homo sapiens R-HSA-380994	5.34425	19.9889	0.112425	0.023748	['IGFBP1', 'NFYB', 'EXOSC8']	Reactome Pathways	1.62437	downregulated
RNA Polymerase II Transcription Initiation And Promoter Clearance Homo sapiens R-HSA-76042	3.92339	14.6616	0.112425	0.0238261	['TAF4B', 'TAF9B', 'TAF3', 'TAF2']	Reactome Pathways	1.62295	downregulated
RNA Polymerase II Transcription Initiation Homo sapiens R-HSA-75953	3.92339	14.6616	0.112425	0.0238261	['TAF4B', 'TAF9B', 'TAF3', 'TAF2']	Reactome Pathways	1.62295	downregulated
RNA Polymerase II Transcription Pre-Initiation And Promoter Opening Homo sapiens R-HSA-73779	3.92339	14.6616	0.112425	0.0238261	['TAF4B', 'TAF9B', 'TAF3', 'TAF2']	Reactome Pathways	1.62295	downregulated
HIV Transcription Initiation Homo sapiens R-HSA-167161	3.92339	14.6616	0.112425	0.0238261	['TAF4B', 'TAF9B', 'TAF3', 'TAF2']	Reactome Pathways	1.62295	downregulated
Transcriptional activity of SMAD2/SMAD3:SMAD4 heterotrimer Homo sapiens R-HSA-2173793	3.92339	14.6616	0.112425	0.0238261	['SMAD3', 'RBL1', 'TFDP1', 'SMURF2']	Reactome Pathways	1.62295	downregulated
RNA Polymerase II Promoter Escape Homo sapiens R-HSA-73776	3.92339	14.6616	0.112425	0.0238261	['TAF4B', 'TAF9B', 'TAF3', 'TAF2']	Reactome Pathways	1.62295	downregulated
RNA Polymerase II HIV Promoter Escape Homo sapiens R-HSA-167162	3.92339	14.6616	0.112425	0.0238261	['TAF4B', 'TAF9B', 'TAF3', 'TAF2']	Reactome Pathways	1.62295	downregulated
Signaling by FGFR3 fusions in cancer Homo sapiens R-HSA-8853334	9.78514	36.2637	0.115272	0.0245757	['PIK3CA', 'FRS2']	Reactome Pathways	1.60949	downregulated
ABC-family proteins mediated transport Homo sapiens R-HSA-382556	3.8275	14.0209	0.119598	0.0256499	['EIF2S3', 'ABCA6', 'ABCC9', 'ABCE1']	Reactome Pathways	1.59091	downregulated
Transcription of the HIV genome Homo sapiens R-HSA-167172	3.16683	11.5547	0.120638	0.026026	['RNMT', 'TAF4B', 'TAF9B', 'TAF3', 'TAF2']	Reactome Pathways	1.58459	downregulated
Disease Homo sapiens R-HSA-1643685	1.53763	5.59668	0.120762	0.0262572	['NUP205', 'NUP107', 'NUP188', 'RNMT', 'FGF2', 'THBS1', 'THSD4', 'IPO5', 'PSMD5', 'TPR', 'KPNA4', 'TAF9B', 'PAK2', 'FGF23', 'SMAD3', 'NUP155', 'FRS2', 'TGFBR2', 'PIK3CA', 'APC', 'PSME4', 'TAF4B', 'NUP54', 'MAMLD1', 'TAF3', 'KPNB1', 'TAF2']	Reactome Pathways	1.58075	downregulated
SHC-mediated cascade:FGFR2 Homo sapiens R-HSA-5654699	5.11163	18.5855	0.120762	0.0263593	['FRS2', 'FGF2', 'FGF23']	Reactome Pathways	1.57907	downregulated
CLEC7A (Dectin-1) induces NFAT activation Homo sapiens R-HSA-5607763	8.69746	30.6306	0.130802	0.0295467	['PPP3R1', 'NFATC2']	Reactome Pathways	1.52949	downregulated
RHO GTPases activate IQGAPs Homo sapiens R-HSA-5626467	8.69746	30.6306	0.130802	0.0295467	['CLIP1', 'IQGAP1']	Reactome Pathways	1.52949	downregulated
Signaling by activated point mutants of FGFR1 Homo sapiens R-HSA-1839122	8.69746	30.6306	0.130802	0.0295467	['FGF2', 'FGF23']	Reactome Pathways	1.52949	downregulated
FGFR1c ligand binding and activation Homo sapiens R-HSA-190373	8.69746	30.6306	0.130802	0.0295467	['FGF2', 'FGF23']	Reactome Pathways	1.52949	downregulated
CDC6 association with the ORC:origin complex Homo sapiens R-HSA-68689	8.69746	30.6306	0.130802	0.0295467	['MCM8', 'CDC6']	Reactome Pathways	1.52949	downregulated
Signaling by FGFR4 in disease Homo sapiens R-HSA-5655291	8.69746	30.6306	0.130802	0.0295467	['PIK3CA', 'FRS2']	Reactome Pathways	1.52949	downregulated
PERK regulates gene expression Homo sapiens R-HSA-381042	4.70221	16.1817	0.140972	0.0320229	['IGFBP1', 'NFYB', 'EXOSC8']	Reactome Pathways	1.49454	downregulated
Signaling by activated point mutants of FGFR3 Homo sapiens R-HSA-1839130	7.82731	26.2675	0.149371	0.0348785	['FGF2', 'FGF23']	Reactome Pathways	1.45744	downregulated
FGFR3 mutant receptor activation Homo sapiens R-HSA-2033514	7.82731	26.2675	0.149371	0.0348785	['FGF2', 'FGF23']	Reactome Pathways	1.45744	downregulated
CD28 dependent Vav1 pathway Homo sapiens R-HSA-389359	7.82731	26.2675	0.149371	0.0348785	['PAK1', 'PAK2']	Reactome Pathways	1.45744	downregulated
TP53 Regulates Transcription of Caspase Activators and Caspases Homo sapiens R-HSA-6803207	7.82731	26.2675	0.149371	0.0348785	['APAF1', 'CASP2']	Reactome Pathways	1.45744	downregulated
Inhibition of replication initiation of damaged DNA by RB1/E2F1 Homo sapiens R-HSA-113501	7.82731	26.2675	0.149371	0.0348785	['POLA1', 'TFDP1']	Reactome Pathways	1.45744	downregulated
Negative regulation of FGFR3 signaling Homo sapiens R-HSA-5654732	4.52113	15.1472	0.149395	0.0350736	['FRS2', 'FGF2', 'FGF23']	Reactome Pathways	1.45502	downregulated
Organelle biogenesis and maintenance Homo sapiens R-HSA-1852241	1.7716	5.90854	0.150863	0.0356099	['PLK4', 'MRPS35', 'CCP110', 'HAUS6', 'ASAP1', 'TUBA4A', 'PCM1', 'RP2', 'CENPJ', 'ALMS1', 'TFAM', 'CEP83', 'CDK5RAP2', 'CEP78']	Reactome Pathways	1.44843	downregulated
RNA Polymerase II Transcription Homo sapiens R-HSA-73857	2.35227	7.80055	0.152927	0.036291	['RNMT', 'TAF4B', 'THOC2', 'TAF9B', 'TAF3', 'THOC7', 'TAF2']	Reactome Pathways	1.4402	downregulated
Mitotic Telophase/Cytokinesis Homo sapiens R-HSA-68884	7.11537	22.8063	0.165438	0.0405502	['STAG2', 'SMC3']	Reactome Pathways	1.39201	downregulated
FGFRL1 modulation of FGFR1 signaling Homo sapiens R-HSA-5658623	7.11537	22.8063	0.165438	0.0405502	['FGF2', 'FGF23']	Reactome Pathways	1.39201	downregulated
TP53 Regulates Transcription of Genes Involved in G1 Cell Cycle Arrest Homo sapiens R-HSA-6804116	7.11537	22.8063	0.165438	0.0405502	['CCNE2', 'E2F7']	Reactome Pathways	1.39201	downregulated
FGFR2c ligand binding and activation Homo sapiens R-HSA-190375	7.11537	22.8063	0.165438	0.0405502	['FGF2', 'FGF23']	Reactome Pathways	1.39201	downregulated
FGFR3c ligand binding and activation Homo sapiens R-HSA-190372	7.11537	22.8063	0.165438	0.0405502	['FGF2', 'FGF23']	Reactome Pathways	1.39201	downregulated
FGFR3 ligand binding and activation Homo sapiens R-HSA-190239	7.11537	22.8063	0.165438	0.0405502	['FGF2', 'FGF23']	Reactome Pathways	1.39201	downregulated
Nonhomologous End-Joining (NHEJ) Homo sapiens R-HSA-5693571	3.26815	10.4607	0.165438	0.0407297	['PAXIP1', 'RIF1', 'FAM175A', 'BRCA1']	Reactome Pathways	1.39009	downregulated
Negative regulation of FGFR4 signaling Homo sapiens R-HSA-5654733	4.19776	13.3467	0.167277	0.0416069	['FRS2', 'FGF2', 'FGF23']	Reactome Pathways	1.38083	downregulated
FGFR1 mutant receptor activation Homo sapiens R-HSA-1839124	4.19776	13.3467	0.167277	0.0416069	['PIK3CA', 'FGF2', 'FGF23']	Reactome Pathways	1.38083	downregulated
Influenza Viral RNA Transcription and Replication Homo sapiens R-HSA-168273	2.27403	7.21213	0.16776	0.0419401	['NUP205', 'NUP107', 'NUP188', 'NUP155', 'TPR', 'NUP54', 'IPO5']	Reactome Pathways	1.37737	downregulated
Class I MHC mediated antigen processing & presentation Homo sapiens R-HSA-983169	1.75596	5.48657	0.174939	0.0439568	['HACE1', 'SMURF2', 'UBA6', 'UBE2G1', 'SH3RF1', 'TRAIP', 'UBE2W', 'HECTD1', 'HECTD2', 'PSMD5', 'HECW2', 'PSME4', 'TRIM37']	Reactome Pathways	1.35697	downregulated
tRNA processing Homo sapiens R-HSA-72306	2.42953	7.557	0.175882	0.0445795	['NUP205', 'NUP107', 'NUP188', 'NUP155', 'TPR', 'NUP54']	Reactome Pathways	1.35087	downregulated
Signaling by Robo receptor Homo sapiens R-HSA-376176	4.0528	12.5603	0.175882	0.0450865	['PAK1', 'PAK2', 'SRGAP1']	Reactome Pathways	1.34595	downregulated
SMAD2/SMAD3:SMAD4 heterotrimer regulates transcription Homo sapiens R-HSA-2173796	4.0528	12.5603	0.175882	0.0450865	['SMAD3', 'RBL1', 'TFDP1']	Reactome Pathways	1.34595	downregulated
Negative regulation of FGFR1 signaling Homo sapiens R-HSA-5654726	4.0528	12.5603	0.175882	0.0450865	['FRS2', 'FGF2', 'FGF23']	Reactome Pathways	1.34595	downregulated
Activation of Rac Homo sapiens R-HSA-428540	6.52209	20.0059	0.178032	0.0465414	['PAK1', 'PAK2']	Reactome Pathways	1.33216	downregulated
Synthesis of PIPs at the early endosome membrane Homo sapiens R-HSA-1660516	6.52209	20.0059	0.178032	0.0465414	['PIKFYVE', 'INPP5F']	Reactome Pathways	1.33216	downregulated
FGFR4 ligand binding and activation Homo sapiens R-HSA-190322	6.52209	20.0059	0.178032	0.0465414	['FGF2', 'FGF23']	Reactome Pathways	1.33216	downregulated
Mismatch repair (MMR) directed by MSH2:MSH3 (MutSbeta) Homo sapiens R-HSA-5358606	6.52209	20.0059	0.178032	0.0465414	['MSH2', 'EXO1']	Reactome Pathways	1.33216	downregulated
PI3K Cascade Homo sapiens R-HSA-109704	2.65165	8.0616	0.182057	0.0478245	['PIK3CA', 'CAB39', 'FRS2', 'FGF2', 'FGF23']	Reactome Pathways	1.32035	downregulated
CD28 co-stimulation Homo sapiens R-HSA-389356	3.91751	11.8385	0.184519	0.0487056	['PAK1', 'PIK3CA', 'PAK2']	Reactome Pathways	1.31242	downregulated
Negative regulation of FGFR2 signaling Homo sapiens R-HSA-5654727	3.79094	11.1744	0.197801	0.0524624	['FRS2', 'FGF2', 'FGF23']	Reactome Pathways	1.28015	downregulated
FGFR1 ligand binding and activation Homo sapiens R-HSA-190242	6.02008	17.7028	0.198248	0.0528327	['FGF2', 'FGF23']	Reactome Pathways	1.2771	downregulated
Nucleotide Excision Repair Homo sapiens R-HSA-5696398	2.30984	6.74616	0.200861	0.0539002	['USP7', 'RFC3', 'RFC2', 'PARP2', 'POLE2', 'PIAS1']	Reactome Pathways	1.26841	downregulated
Processing of Capped Intron-Containing Pre-mRNA Homo sapiens R-HSA-72203	1.92425	5.61505	0.200861	0.0540387	['NUP205', 'NUP107', 'NUP188', 'NUP155', 'TPR', 'NUP54', 'THOC2', 'THOC7', 'CCAR1']	Reactome Pathways	1.26729	downregulated
Global Genome Nucleotide Excision Repair (GG-NER) Homo sapiens R-HSA-5696399	2.54795	7.41053	0.201851	0.0545612	['RFC3', 'RFC2', 'PARP2', 'POLE2', 'PIAS1']	Reactome Pathways	1.26312	downregulated
CDT1 association with the CDC6:ORC:origin complex Homo sapiens R-HSA-68827	2.90412	8.324	0.209559	0.0569107	['MCM8', 'PSMD5', 'PSME4', 'CDC6']	Reactome Pathways	1.24481	downregulated
Interferon Signaling Homo sapiens R-HSA-913531	1.89308	5.37606	0.21417	0.0584347	['NUP205', 'NUP107', 'NUP188', 'NUP155', 'TPR', 'KPNA4', 'NUP54', 'KPNB1', 'PIAS1']	Reactome Pathways	1.23333	downregulated
Polo-like kinase mediated events Homo sapiens R-HSA-156711	5.58979	15.782	0.21672	0.0594054	['LIN54', 'MYBL2']	Reactome Pathways	1.22617	downregulated
Telomere Maintenance Homo sapiens R-HSA-157579	2.85117	8.02639	0.217508	0.0598976	['POLA1', 'RFC3', 'RFC2', 'POLE2']	Reactome Pathways	1.22259	downregulated
Meiosis Homo sapiens R-HSA-1500620	2.45202	6.8253	0.223457	0.0618192	['PSMC3IP', 'STAG2', 'RBBP8', 'BRCA1', 'SMC3']	Reactome Pathways	1.20888	downregulated
PI Metabolism Homo sapiens R-HSA-1483255	2.80012	7.74276	0.226563	0.0629662	['PIKFYVE', 'PIK3CA', 'INPP5F', 'MTMR6']	Reactome Pathways	1.20089	downregulated
TP53 Regulates Transcription of DNA Repair Genes Homo sapiens R-HSA-6796648	2.75085	7.47226	0.235128	0.0661159	['MSH2', 'FANCD2', 'BRCA1', 'CDK12']	Reactome Pathways	1.17969	downregulated
Constitutive Signaling by Aberrant PI3K in Cancer Homo sapiens R-HSA-2219530	2.75085	7.47226	0.235128	0.0661159	['PIK3CA', 'FRS2', 'FGF2', 'FGF23']	Reactome Pathways	1.17969	downregulated
Activated point mutants of FGFR2 Homo sapiens R-HSA-2033519	5.21687	14.1609	0.235128	0.0662416	['FGF2', 'FGF23']	Reactome Pathways	1.17887	downregulated
Epigenetic regulation of gene expression Homo sapiens R-HSA-212165	2.16072	5.78348	0.243091	0.0687934	['TAF1B', 'UHRF1', 'DDX21', 'DEK', 'JARID2', 'SIRT1']	Reactome Pathways	1.16245	downregulated
Gap-filling DNA repair synthesis and ligation in TC-NER Homo sapiens R-HSA-6782210	2.70328	7.2141	0.24395	0.0693462	['USP7', 'RFC3', 'RFC2', 'POLE2']	Reactome Pathways	1.15898	downregulated
Dual incision in TC-NER Homo sapiens R-HSA-6782135	2.65733	6.96755	0.253332	0.0726563	['USP7', 'RFC3', 'RFC2', 'POLE2']	Reactome Pathways	1.13873	downregulated
Signaling by FGFR in disease Homo sapiens R-HSA-1226099	2.65733	6.96755	0.253332	0.0726563	['PIK3CA', 'FRS2', 'FGF2', 'FGF23']	Reactome Pathways	1.13873	downregulated
TP53 Regulates Transcription of Genes Involved in G2 Cell Cycle Arrest Homo sapiens R-HSA-6804114	4.89056	12.7784	0.253418	0.073324	['RBL1', 'TFDP1']	Reactome Pathways	1.13475	downregulated
SHC-mediated cascade:FGFR3 Homo sapiens R-HSA-5654704	4.89056	12.7784	0.253418	0.073324	['FGF2', 'FGF23']	Reactome Pathways	1.13475	downregulated
TCR signaling Homo sapiens R-HSA-202403	2.10252	5.42275	0.260538	0.0758368	['PAK1', 'PIK3CA', 'PSMD5', 'PSME4', 'PAK2', 'PAG1']	Reactome Pathways	1.12012	downregulated
RNA Polymerase II Pre-transcription Events Homo sapiens R-HSA-674695	2.6129	6.73195	0.260538	0.0760454	['TAF4B', 'TAF9B', 'TAF3', 'TAF2']	Reactome Pathways	1.11893	downregulated
Cellular responses to stress Homo sapiens R-HSA-2262752	1.56249	3.97649	0.2677	0.0784755	['NUP205', 'NUP107', 'NUP188', 'NUP155', 'ATG10', 'HSPA14', 'SIRT1', 'ETS1', 'IL1A', 'DNAJC2', 'TFDP1', 'CCNE2', 'TPR', 'NUP54']	Reactome Pathways	1.10527	downregulated
Ephrin signaling Homo sapiens R-HSA-3928664	4.60265	11.5886	0.271978	0.0806362	['PAK1', 'PAK2']	Reactome Pathways	1.09347	downregulated
Translesion Synthesis by POLH Homo sapiens R-HSA-110320	4.60265	11.5886	0.271978	0.0806362	['RFC3', 'RFC2']	Reactome Pathways	1.09347	downregulated
MAPK6/MAPK4 signaling Homo sapiens R-HSA-5687128	2.25392	5.67134	0.271978	0.0807649	['PAK1', 'PSMD5', 'PSME4', 'CDC42EP3', 'PAK2']	Reactome Pathways	1.09278	downregulated
Condensation of Prophase Chromosomes Homo sapiens R-HSA-2299718	3.0915	7.71639	0.276348	0.0824136	['NCAPD3', 'SMC4', 'SMC2']	Reactome Pathways	1.084	downregulated
Intrinsic Pathway for Apoptosis Homo sapiens R-HSA-109606	3.01207	7.34872	0.290408	0.0871822	['PPP3R1', 'TFDP1', 'APAF1']	Reactome Pathways	1.05957	downregulated
Syndecan interactions Homo sapiens R-HSA-3000170	4.34672	10.5563	0.290408	0.0881622	['THBS1', 'FGF2']	Reactome Pathways	1.05472	downregulated
FGFR2 ligand binding and activation Homo sapiens R-HSA-190241	4.34672	10.5563	0.290408	0.0881622	['FGF2', 'FGF23']	Reactome Pathways	1.05472	downregulated
Signaling by Hippo Homo sapiens R-HSA-2028269	4.34672	10.5563	0.290408	0.0881622	['MOB1B', 'STK3']	Reactome Pathways	1.05472	downregulated
C-type lectin receptors (CLRs) Homo sapiens R-HSA-5621481	2.01215	4.88011	0.290408	0.0884492	['PPP3R1', 'PAK1', 'PSMD5', 'PSME4', 'NFATC2', 'PAK2']	Reactome Pathways	1.05331	downregulated
COPII (Coat Protein 2) Mediated Vesicle Transport Homo sapiens R-HSA-204005	2.44909	5.8871	0.295499	0.0903748	['TRAPPC6B', 'PPP6R3', 'SEC22B', 'SEC22A']	Reactome Pathways	1.04395	downregulated
TP53 regulates transcription of additional cell cycle genes whose exact role in the p53 pathway remain uncertain Homo sapiens R-HSA-6804115	4.11773	9.65438	0.308403	0.0958868	['CNOT6L', 'CENPJ']	Reactome Pathways	1.01824	downregulated
SHC-mediated cascade:FGFR1 Homo sapiens R-HSA-5654688	4.11773	9.65438	0.308403	0.0958868	['FGF2', 'FGF23']	Reactome Pathways	1.01824	downregulated
CD209 (DC-SIGN) signaling Homo sapiens R-HSA-5621575	4.11773	9.65438	0.308403	0.0958868	['PAK1', 'PAK2']	Reactome Pathways	1.01824	downregulated
RHO GTPases activate PAKs Homo sapiens R-HSA-5627123	4.11773	9.65438	0.308403	0.0958868	['PAK1', 'PAK2']	Reactome Pathways	1.01824	downregulated
Kinesins Homo sapiens R-HSA-983189	2.86485	6.68211	0.3109	0.0970577	['KIF11', 'KIF20B', 'KIF15']	Reactome Pathways	1.01297	downregulated
MAPK family signaling cascades Homo sapiens R-HSA-5683057	1.58428	3.62418	0.32385	0.101511	['GRIN2A', 'PAK1', 'PSMD5', 'PSME4', 'CDC42EP3', 'RASA2', 'FRS2', 'IQGAP1', 'PAK2', 'FGF2', 'FGF23']	Reactome Pathways	0.993485	downregulated
Nephrin interactions Homo sapiens R-HSA-373753	3.91165	8.86118	0.329802	0.103796	['PIK3CA', 'IQGAP1']	Reactome Pathways	0.983821	downregulated
VEGFA-VEGFR2 Pathway Homo sapiens R-HSA-4420097	1.53225	3.41839	0.339965	0.107426	['NCKAP1', 'GRIN2A', 'PAK1', 'PIK3CA', 'PSMD5', 'PSME4', 'RASA2', 'FRS2', 'IQGAP1', 'PAK2', 'FGF2', 'FGF23']	Reactome Pathways	0.968892	downregulated
Cell-Cell communication Homo sapiens R-HSA-1500931	1.88259	4.14093	0.349395	0.110849	['CLDN11', 'PAK1', 'PIK3CA', 'IQGAP1', 'MPP5', 'LIMS1']	Reactome Pathways	0.955269	downregulated
Downregulation of SMAD2/3:SMAD4 transcriptional activity Homo sapiens R-HSA-2173795	3.72519	8.15957	0.349829	0.111874	['SMAD3', 'SMURF2']	Reactome Pathways	0.951269	downregulated
Signaling by BMP Homo sapiens R-HSA-201451	3.72519	8.15957	0.349829	0.111874	['ZFYVE16', 'SMURF2']	Reactome Pathways	0.951269	downregulated
Catabolism of glucuronate to xylulose-5-phosphate Homo sapiens R-HSA-5661270	9.76754	20.7984	0.360405	0.118915	['XYLB']	Reactome Pathways	0.924762	downregulated
Hyaluronan biosynthesis and export Homo sapiens R-HSA-2142850	9.76754	20.7984	0.360405	0.118915	['HAS3']	Reactome Pathways	0.924762	downregulated
Extrinsic Pathway of Fibrin Clot Formation Homo sapiens R-HSA-140834	9.76754	20.7984	0.360405	0.118915	['TFPI']	Reactome Pathways	0.924762	downregulated
SUMO is conjugated to E1 (UBA2:SAE1) Homo sapiens R-HSA-3065676	9.76754	20.7984	0.360405	0.118915	['UBA2']	Reactome Pathways	0.924762	downregulated
Cytochrome c-mediated apoptotic response Homo sapiens R-HSA-111461	9.76754	20.7984	0.360405	0.118915	['APAF1']	Reactome Pathways	0.924762	downregulated
Activation of caspases through apoptosome-mediated cleavage Homo sapiens R-HSA-111459	9.76754	20.7984	0.360405	0.118915	['APAF1']	Reactome Pathways	0.924762	downregulated
Trafficking of myristoylated proteins to the cilium Homo sapiens R-HSA-5624138	9.76754	20.7984	0.360405	0.118915	['RP2']	Reactome Pathways	0.924762	downregulated
Na+-dependent glucose transporters Homo sapiens R-HSA-428808	9.76754	20.7984	0.360405	0.118915	['SLC5A9']	Reactome Pathways	0.924762	downregulated
Signaling by VEGF Homo sapiens R-HSA-194138	1.49284	3.13644	0.368519	0.122335	['NCKAP1', 'GRIN2A', 'PAK1', 'PIK3CA', 'PSMD5', 'PSME4', 'RASA2', 'FRS2', 'IQGAP1', 'PAK2', 'FGF2', 'FGF23']	Reactome Pathways	0.912448	downregulated
Transcription-Coupled Nucleotide Excision Repair (TC-NER) Homo sapiens R-HSA-6781827	2.17608	4.56849	0.368519	0.122528	['USP7', 'RFC3', 'RFC2', 'POLE2']	Reactome Pathways	0.911765	downregulated
Regulation of activated PAK-2p34 by proteasome mediated degradation Homo sapiens R-HSA-211733	2.5528	5.33774	0.370243	0.123571	['PSMD5', 'PSME4', 'PAK2']	Reactome Pathways	0.908084	downregulated
Synthesis and interconversion of nucleotide di- and triphosphates Homo sapiens R-HSA-499943	3.40091	6.97836	0.382625	0.128489	['RRM1', 'RRM2']	Reactome Pathways	0.891134	downregulated
CDK-mediated phosphorylation and removal of Cdc6 Homo sapiens R-HSA-69017	2.49835	5.11338	0.382625	0.12916	['PSMD5', 'PSME4', 'CDC6']	Reactome Pathways	0.888871	downregulated
Regulation of Apoptosis Homo sapiens R-HSA-169911	2.49835	5.11338	0.382625	0.12916	['PSMD5', 'PSME4', 'PAK2']	Reactome Pathways	0.888871	downregulated
SLC-mediated transmembrane transport Homo sapiens R-HSA-425407	1.52207	3.03352	0.399521	0.136283	['SLC4A7', 'NUP205', 'NUP107', 'SLC5A9', 'NUP188', 'NUP155', 'TPR', 'SLC39A10', 'SLC16A7', 'NUP54']	Reactome Pathways	0.865559	downregulated
Nucleosome assembly Homo sapiens R-HSA-774815	2.39613	4.70083	0.399521	0.140599	['CENPI', 'CENPK', 'RSF1']	Reactome Pathways	0.852017	downregulated
Deposition of new CENPA-containing nucleosomes at the centromere Homo sapiens R-HSA-606279	2.39613	4.70083	0.399521	0.140599	['CENPI', 'CENPK', 'RSF1']	Reactome Pathways	0.852017	downregulated
IRF3 mediated activation of type 1 IFN Homo sapiens R-HSA-1606341	7.81363	15.3097	0.399521	0.140948	['TBK1']	Reactome Pathways	0.850942	downregulated
Molybdenum cofactor biosynthesis Homo sapiens R-HSA-947581	7.81363	15.3097	0.399521	0.140948	['MOCS2']	Reactome Pathways	0.850942	downregulated
Methionine salvage pathway Homo sapiens R-HSA-1237112	7.81363	15.3097	0.399521	0.140948	['MTAP']	Reactome Pathways	0.850942	downregulated
Acyl chain remodeling of CL Homo sapiens R-HSA-1482798	7.81363	15.3097	0.399521	0.140948	['LCLAT1']	Reactome Pathways	0.850942	downregulated
SUMO is transferred from E1 to E2 (UBE2I, UBC9) Homo sapiens R-HSA-3065678	7.81363	15.3097	0.399521	0.140948	['UBA2']	Reactome Pathways	0.850942	downregulated
Proton-coupled monocarboxylate transport Homo sapiens R-HSA-433692	7.81363	15.3097	0.399521	0.140948	['SLC16A7']	Reactome Pathways	0.850942	downregulated
Phosphorylation of Emi1 Homo sapiens R-HSA-176417	7.81363	15.3097	0.399521	0.140948	['FBXO5']	Reactome Pathways	0.850942	downregulated
NADE modulates death signalling Homo sapiens R-HSA-205025	7.81363	15.3097	0.399521	0.140948	['CASP2']	Reactome Pathways	0.850942	downregulated
FGFR1b ligand binding and activation Homo sapiens R-HSA-190370	7.81363	15.3097	0.399521	0.140948	['FGF2']	Reactome Pathways	0.850942	downregulated
COPI-dependent Golgi-to-ER retrograde traffic Homo sapiens R-HSA-6811434	2.03425	3.93148	0.408387	0.144765	['KIF11', 'KIF20B', 'SEC22B', 'KIF15']	Reactome Pathways	0.839337	downregulated
RORA activates gene expression Homo sapiens R-HSA-1368082	3.12851	6.02765	0.408387	0.145631	['NRIP1', 'SIRT1']	Reactome Pathways	0.836748	downregulated
VEGFR2 mediated vascular permeability Homo sapiens R-HSA-5218920	3.12851	6.02765	0.408387	0.145631	['PAK1', 'PAK2']	Reactome Pathways	0.836748	downregulated
Degradation of AXIN Homo sapiens R-HSA-4641257	2.30193	4.33106	0.422753	0.152363	['SMURF2', 'PSMD5', 'PSME4']	Reactome Pathways	0.817121	downregulated
SCF-beta-TrCP mediated degradation of Emi1 Homo sapiens R-HSA-174113	2.30193	4.33106	0.422753	0.152363	['PSMD5', 'PSME4', 'FBXO5']	Reactome Pathways	0.817121	downregulated
Meiotic recombination Homo sapiens R-HSA-912446	2.30193	4.33106	0.422753	0.152363	['PSMC3IP', 'RBBP8', 'BRCA1']	Reactome Pathways	0.817121	downregulated
PI5P, PP2A and IER3 Regulate PI3K/AKT Signaling Homo sapiens R-HSA-6811558	1.98254	3.70802	0.425997	0.154072	['PIK3CA', 'FRS2', 'FGF2', 'FGF23']	Reactome Pathways	0.812275	downregulated
Regulation of cholesterol biosynthesis by SREBP (SREBF) Homo sapiens R-HSA-1655829	2.25755	4.16042	0.436315	0.158358	['NFYB', 'ELOVL6', 'KPNB1']	Reactome Pathways	0.80036	downregulated
Interleukin receptor SHC signaling Homo sapiens R-HSA-912526	1.49622	2.7224	0.436844	0.162104	['GRIN2A', 'PIK3CA', 'PSMD5', 'PSME4', 'RASA2', 'FRS2', 'IQGAP1', 'FGF2', 'FGF23']	Reactome Pathways	0.790207	downregulated
Interleukin-1 processing Homo sapiens R-HSA-448706	6.51102	11.8338	0.436844	0.162431	['IL1A']	Reactome Pathways	0.789332	downregulated
Apoptotic factor-mediated response Homo sapiens R-HSA-111471	6.51102	11.8338	0.436844	0.162431	['APAF1']	Reactome Pathways	0.789332	downregulated
CREB phosphorylation Homo sapiens R-HSA-199920	6.51102	11.8338	0.436844	0.162431	['ATF1']	Reactome Pathways	0.789332	downregulated
Clearance of Nuclear Envelope Membranes from Chromatin Homo sapiens R-HSA-2993913	6.51102	11.8338	0.436844	0.162431	['VRK1']	Reactome Pathways	0.789332	downregulated
POLB-Dependent Long Patch Base Excision Repair Homo sapiens R-HSA-110362	6.51102	11.8338	0.436844	0.162431	['PARP2']	Reactome Pathways	0.789332	downregulated
Inositol transporters Homo sapiens R-HSA-429593	6.51102	11.8338	0.436844	0.162431	['SLC5A9']	Reactome Pathways	0.789332	downregulated
Activation of BH3-only proteins Homo sapiens R-HSA-114452	2.89647	5.25056	0.437437	0.163206	['PPP3R1', 'TFDP1']	Reactome Pathways	0.787263	downregulated
Unfolded Protein Response (UPR) Homo sapiens R-HSA-381119	1.90972	3.40154	0.448414	0.16844	['IGFBP1', 'NFYB', 'EXOSC8', 'SULT1A3']	Reactome Pathways	0.773555	downregulated
PI3K/AKT Signaling in Cancer Homo sapiens R-HSA-2219528	1.90972	3.40154	0.448414	0.16844	['PIK3CA', 'FRS2', 'FGF2', 'FGF23']	Reactome Pathways	0.773555	downregulated
Pre-NOTCH Expression and Processing Homo sapiens R-HSA-1912422	2.17371	3.84459	0.451008	0.170559	['TFDP1', 'ATP2A2', 'MAMLD1']	Reactome Pathways	0.768126	downregulated
Meiotic synapsis Homo sapiens R-HSA-1221632	2.17371	3.84459	0.451008	0.170559	['STAG2', 'BRCA1', 'SMC3']	Reactome Pathways	0.768126	downregulated
Tight junction interactions Homo sapiens R-HSA-420029	2.79289	4.91409	0.453641	0.17213	['CLDN11', 'MPP5']	Reactome Pathways	0.764142	downregulated
IRS-mediated signalling Homo sapiens R-HSA-112399	1.432	2.48924	0.461819	0.175819	['GRIN2A', 'CAB39', 'PIK3CA', 'PSMD5', 'PSME4', 'RASA2', 'FRS2', 'IQGAP1', 'FGF2', 'FGF23']	Reactome Pathways	0.754934	downregulated
B-WICH complex positively regulates rRNA expression Homo sapiens R-HSA-5250924	2.13408	3.6983	0.462741	0.176758	['TAF1B', 'DDX21', 'DEK']	Reactome Pathways	0.752622	downregulated
Interleukin-2 signaling Homo sapiens R-HSA-451927	1.45259	2.47854	0.470187	0.181539	['GRIN2A', 'PIK3CA', 'PSMD5', 'PSME4', 'RASA2', 'FRS2', 'IQGAP1', 'FGF2', 'FGF23']	Reactome Pathways	0.741031	downregulated
Synthesis of UDP-N-acetyl-glucosamine Homo sapiens R-HSA-446210	5.58059	9.46585	0.470187	0.183377	['PGM3']	Reactome Pathways	0.736655	downregulated
Activation of PUMA and translocation to mitochondria Homo sapiens R-HSA-139915	5.58059	9.46585	0.470187	0.183377	['TFDP1']	Reactome Pathways	0.736655	downregulated
Nef and signal transduction Homo sapiens R-HSA-164944	5.58059	9.46585	0.470187	0.183377	['PAK2']	Reactome Pathways	0.736655	downregulated
Recycling of eIF2:GDP Homo sapiens R-HSA-72731	5.58059	9.46585	0.470187	0.183377	['EIF2S3']	Reactome Pathways	0.736655	downregulated
Regulation of cytoskeletal remodeling and cell spreading by IPP complex components Homo sapiens R-HSA-446388	5.58059	9.46585	0.470187	0.183377	['LIMS1']	Reactome Pathways	0.736655	downregulated
Insulin receptor signalling cascade Homo sapiens R-HSA-74751	1.41627	2.39919	0.470187	0.183779	['GRIN2A', 'CAB39', 'PIK3CA', 'PSMD5', 'PSME4', 'RASA2', 'FRS2', 'IQGAP1', 'FGF2', 'FGF23']	Reactome Pathways	0.735705	downregulated
Diseases of signal transduction Homo sapiens R-HSA-5663202	1.4111	2.36993	0.470952	0.186468	['SMAD3', 'PIK3CA', 'APC', 'PSMD5', 'PSME4', 'FRS2', 'MAMLD1', 'FGF2', 'FGF23', 'TGFBR2']	Reactome Pathways	0.729395	downregulated
IGF1R signaling cascade Homo sapiens R-HSA-2428924	1.4111	2.36993	0.470952	0.186468	['GRIN2A', 'CAB39', 'PIK3CA', 'PSMD5', 'PSME4', 'RASA2', 'FRS2', 'IQGAP1', 'FGF2', 'FGF23']	Reactome Pathways	0.729395	downregulated
Signaling by Type 1 Insulin-like Growth Factor 1 Receptor (IGF1R) Homo sapiens R-HSA-2404192	1.4111	2.36993	0.470952	0.186468	['GRIN2A', 'CAB39', 'PIK3CA', 'PSMD5', 'PSME4', 'RASA2', 'FRS2', 'IQGAP1', 'FGF2', 'FGF23']	Reactome Pathways	0.729395	downregulated
IRS-related events triggered by IGF1R Homo sapiens R-HSA-2428928	1.4111	2.36993	0.470952	0.186468	['GRIN2A', 'CAB39', 'PIK3CA', 'PSMD5', 'PSME4', 'RASA2', 'FRS2', 'IQGAP1', 'FGF2', 'FGF23']	Reactome Pathways	0.729395	downregulated
Negative regulation of the PI3K/AKT network Homo sapiens R-HSA-199418	1.82052	3.03985	0.474032	0.18829	['PIK3CA', 'FRS2', 'FGF2', 'FGF23']	Reactome Pathways	0.725174	downregulated
FCERI mediated MAPK activation Homo sapiens R-HSA-2871796	1.40597	2.34105	0.474745	0.189175	['GRIN2A', 'PAK1', 'PSMD5', 'PSME4', 'RASA2', 'FRS2', 'IQGAP1', 'PAK2', 'FGF2', 'FGF23']	Reactome Pathways	0.723136	downregulated
Oncogene Induced Senescence Homo sapiens R-HSA-2559585	2.60643	4.32581	0.475806	0.190202	['TFDP1', 'ETS1']	Reactome Pathways	0.720786	downregulated
Fc epsilon receptor (FCERI) signaling Homo sapiens R-HSA-2454202	1.33596	2.20296	0.479403	0.192248	['NFATC2', 'FRS2', 'IQGAP1', 'FGF2', 'PPP3R1', 'GRIN2A', 'PAK1', 'PIK3CA', 'PSMD5', 'PSME4', 'RASA2', 'PAK2', 'FGF23']	Reactome Pathways	0.716139	downregulated
Cell death signalling via NRAGE, NRIF and NADE Homo sapiens R-HSA-204998	2.02338	3.30038	0.486497	0.19571	['TIAM1', 'CASP2', 'ECT2']	Reactome Pathways	0.708387	downregulated
Smooth Muscle Contraction Homo sapiens R-HSA-445355	2.52222	4.06781	0.49239	0.199331	['TPM4', 'TPM1']	Reactome Pathways	0.700426	downregulated
FGFR2 mutant receptor activation Homo sapiens R-HSA-1839126	2.52222	4.06781	0.49239	0.199331	['FGF2', 'FGF23']	Reactome Pathways	0.700426	downregulated
GAB1 signalosome Homo sapiens R-HSA-180292	1.63131	2.59555	0.495664	0.203706	['PIK3CA', 'FRS2', 'FGF2', 'FGF23', 'PAG1']	Reactome Pathways	0.690996	downregulated
Processing and activation of SUMO Homo sapiens R-HSA-3215018	4.88277	7.76659	0.495664	0.203801	['UBA2']	Reactome Pathways	0.690794	downregulated
Inactivation of Cdc42 and Rac Homo sapiens R-HSA-428543	4.88277	7.76659	0.495664	0.203801	['SRGAP1']	Reactome Pathways	0.690794	downregulated
Bicarbonate transporters Homo sapiens R-HSA-425381	4.88277	7.76659	0.495664	0.203801	['SLC4A7']	Reactome Pathways	0.690794	downregulated
Pyrimidine salvage reactions Homo sapiens R-HSA-73614	4.88277	7.76659	0.495664	0.203801	['DCK']	Reactome Pathways	0.690794	downregulated
Interleukin-3, 5 and GM-CSF signaling Homo sapiens R-HSA-512988	1.40006	2.19862	0.498134	0.207967	['GRIN2A', 'PIK3CA', 'PSMD5', 'PSME4', 'RASA2', 'FRS2', 'IQGAP1', 'FGF2', 'FGF23']	Reactome Pathways	0.682006	downregulated
Synthesis of PIPs at the plasma membrane Homo sapiens R-HSA-1660499	2.44327	3.83049	0.498134	0.20851	['PIK3CA', 'MTMR6']	Reactome Pathways	0.680874	downregulated
Striated Muscle Contraction Homo sapiens R-HSA-390522	2.44327	3.83049	0.498134	0.20851	['TPM4', 'TPM1']	Reactome Pathways	0.680874	downregulated
Asymmetric localization of PCP proteins Homo sapiens R-HSA-4608870	1.95573	3.06521	0.498134	0.208609	['SMURF2', 'PSMD5', 'PSME4']	Reactome Pathways	0.680666	downregulated
p53-Dependent G1/S DNA damage checkpoint Homo sapiens R-HSA-69580	1.95573	3.06521	0.498134	0.208609	['CCNE2', 'PSMD5', 'PSME4']	Reactome Pathways	0.680666	downregulated
p53-Dependent G1 DNA Damage Response Homo sapiens R-HSA-69563	1.95573	3.06521	0.498134	0.208609	['CCNE2', 'PSMD5', 'PSME4']	Reactome Pathways	0.680666	downregulated
Cytokine Signaling in Immune system Homo sapiens R-HSA-1280215	1.24215	1.927	0.504613	0.211963	['NUP205', 'NUP107', 'NUP188', 'NUP155', 'FRS2', 'IQGAP1', 'FGF2', 'PIAS1', 'IL1A', 'GRIN2A', 'PIK3CA', 'PSMD5', 'PSME4', 'TPR', 'RASA2', 'KPNA4', 'NUP54', 'FGF23', 'KPNB1']	Reactome Pathways	0.67374	downregulated
Phospholipid metabolism Homo sapiens R-HSA-1483257	1.51587	2.32174	0.513113	0.216185	['PIKFYVE', 'INPP5F', 'PIK3CA', 'ABHD3', 'LCLAT1', 'MTMR6']	Reactome Pathways	0.665175	downregulated
Generation of second messenger molecules Homo sapiens R-HSA-202433	2.36911	3.6117	0.513689	0.217731	['PAK1', 'PAK2']	Reactome Pathways	0.662079	downregulated
SIRT1 negatively regulates rRNA Expression Homo sapiens R-HSA-427359	2.36911	3.6117	0.513689	0.217731	['TAF1B', 'SIRT1']	Reactome Pathways	0.662079	downregulated
G1/S DNA Damage Checkpoints Homo sapiens R-HSA-69615	1.89245	2.85092	0.516971	0.221691	['CCNE2', 'PSMD5', 'PSME4']	Reactome Pathways	0.654252	downregulated
Zinc influx into cells by the SLC39 gene family Homo sapiens R-HSA-442380	4.34001	6.49866	0.516971	0.223715	['SLC39A10']	Reactome Pathways	0.650305	downregulated
ATF6-alpha activates chaperone genes Homo sapiens R-HSA-381183	4.34001	6.49866	0.516971	0.223715	['NFYB']	Reactome Pathways	0.650305	downregulated
E2F-enabled inhibition of pre-replication complex formation Homo sapiens R-HSA-113507	4.34001	6.49866	0.516971	0.223715	['MCM8']	Reactome Pathways	0.650305	downregulated
FGFR2b ligand binding and activation Homo sapiens R-HSA-190377	4.34001	6.49866	0.516971	0.223715	['FGF2']	Reactome Pathways	0.650305	downregulated
Synthesis of pyrophosphates in the cytosol Homo sapiens R-HSA-1855167	4.34001	6.49866	0.516971	0.223715	['PPIP5K2']	Reactome Pathways	0.650305	downregulated
Synthesis of PIPs at the late endosome membrane Homo sapiens R-HSA-1660517	4.34001	6.49866	0.516971	0.223715	['PIKFYVE']	Reactome Pathways	0.650305	downregulated
Regulation of RAS by GAPs Homo sapiens R-HSA-5658442	1.83312	2.65521	0.53043	0.234931	['PSMD5', 'RASA2', 'PSME4']	Reactome Pathways	0.62906	downregulated
Semaphorin interactions Homo sapiens R-HSA-373755	1.83312	2.65521	0.53043	0.234931	['PAK1', 'SEMA3A', 'PAK2']	Reactome Pathways	0.62906	downregulated
CLEC7A (Dectin-1) signaling Homo sapiens R-HSA-5607764	1.64728	2.383	0.53043	0.235363	['PPP3R1', 'PSMD5', 'PSME4', 'NFATC2']	Reactome Pathways	0.628261	downregulated
GRB2 events in EGFR signaling Homo sapiens R-HSA-179812	1.38054	1.99261	0.53043	0.236134	['GRIN2A', 'PSMD5', 'PSME4', 'RASA2', 'FRS2', 'IQGAP1', 'FGF2', 'FGF23']	Reactome Pathways	0.626841	downregulated
RAF/MAP kinase cascade Homo sapiens R-HSA-5673001	1.38054	1.99261	0.53043	0.236134	['GRIN2A', 'PSMD5', 'PSME4', 'RASA2', 'FRS2', 'IQGAP1', 'FGF2', 'FGF23']	Reactome Pathways	0.626841	downregulated
SHC1 events in ERBB4 signaling Homo sapiens R-HSA-1250347	1.38054	1.99261	0.53043	0.236134	['GRIN2A', 'PSMD5', 'PSME4', 'RASA2', 'FRS2', 'IQGAP1', 'FGF2', 'FGF23']	Reactome Pathways	0.626841	downregulated
SOS-mediated signalling Homo sapiens R-HSA-112412	1.38054	1.99261	0.53043	0.236134	['GRIN2A', 'PSMD5', 'PSME4', 'RASA2', 'FRS2', 'IQGAP1', 'FGF2', 'FGF23']	Reactome Pathways	0.626841	downregulated
SHC1 events in EGFR signaling Homo sapiens R-HSA-180336	1.38054	1.99261	0.53043	0.236134	['GRIN2A', 'PSMD5', 'PSME4', 'RASA2', 'FRS2', 'IQGAP1', 'FGF2', 'FGF23']	Reactome Pathways	0.626841	downregulated
Apoptotic cleavage of cellular proteins Homo sapiens R-HSA-111465	2.23351	3.22246	0.53043	0.23627	['APC', 'CLSPN']	Reactome Pathways	0.626591	downregulated
Defective B3GALTL causes Peters-plus syndrome (PpS) Homo sapiens R-HSA-5083635	2.23351	3.22246	0.53043	0.23627	['THBS1', 'THSD4']	Reactome Pathways	0.626591	downregulated
FRS-mediated FGFR1 signaling Homo sapiens R-HSA-5654693	1.37441	1.964	0.531741	0.239553	['GRIN2A', 'PSMD5', 'PSME4', 'RASA2', 'FRS2', 'IQGAP1', 'FGF2', 'FGF23']	Reactome Pathways	0.620597	downregulated
FRS-mediated FGFR3 signaling Homo sapiens R-HSA-5654706	1.37441	1.964	0.531741	0.239553	['GRIN2A', 'PSMD5', 'PSME4', 'RASA2', 'FRS2', 'IQGAP1', 'FGF2', 'FGF23']	Reactome Pathways	0.620597	downregulated
FRS-mediated FGFR4 signaling Homo sapiens R-HSA-5654712	1.37441	1.964	0.531741	0.239553	['GRIN2A', 'PSMD5', 'PSME4', 'RASA2', 'FRS2', 'IQGAP1', 'FGF2', 'FGF23']	Reactome Pathways	0.620597	downregulated
FRS-mediated FGFR2 signaling Homo sapiens R-HSA-5654700	1.37441	1.964	0.531741	0.239553	['GRIN2A', 'PSMD5', 'PSME4', 'RASA2', 'FRS2', 'IQGAP1', 'FGF2', 'FGF23']	Reactome Pathways	0.620597	downregulated
DSCAM interactions Homo sapiens R-HSA-376172	3.90581	5.52341	0.538168	0.243132	['PAK1']	Reactome Pathways	0.614159	downregulated
O-glycosylation of TSR domain-containing proteins Homo sapiens R-HSA-5173214	2.17135	3.04893	0.539029	0.245573	['THBS1', 'THSD4']	Reactome Pathways	0.609819	downregulated
G1 Phase Homo sapiens R-HSA-69236	2.17135	3.04893	0.539029	0.245573	['RBL1', 'TFDP1']	Reactome Pathways	0.609819	downregulated
Cyclin D associated events in G1 Homo sapiens R-HSA-69231	2.17135	3.04893	0.539029	0.245573	['RBL1', 'TFDP1']	Reactome Pathways	0.609819	downregulated
ARMS-mediated activation Homo sapiens R-HSA-170984	1.35635	1.88079	0.545511	0.249911	['GRIN2A', 'PSMD5', 'PSME4', 'RASA2', 'FRS2', 'IQGAP1', 'FGF2', 'FGF23']	Reactome Pathways	0.602215	downregulated
Signalling to p38 via RIT and RIN Homo sapiens R-HSA-187706	1.35635	1.88079	0.545511	0.249911	['GRIN2A', 'PSMD5', 'PSME4', 'RASA2', 'FRS2', 'IQGAP1', 'FGF2', 'FGF23']	Reactome Pathways	0.602215	downregulated
Signaling by Insulin receptor Homo sapiens R-HSA-74752	1.30172	1.79004	0.550069	0.252804	['GRIN2A', 'CAB39', 'PIK3CA', 'PSMD5', 'PSME4', 'RASA2', 'FRS2', 'IQGAP1', 'FGF2', 'FGF23']	Reactome Pathways	0.597216	downregulated
Frs2-mediated activation Homo sapiens R-HSA-170968	1.35043	1.85389	0.550069	0.253395	['GRIN2A', 'PSMD5', 'PSME4', 'RASA2', 'FRS2', 'IQGAP1', 'FGF2', 'FGF23']	Reactome Pathways	0.596202	downregulated
Association of TriC/CCT with target proteins during biosynthesis Homo sapiens R-HSA-390471	2.11256	2.88771	0.550281	0.254889	['AP3M1', 'CCNE2']	Reactome Pathways	0.593649	downregulated
Formation of Fibrin Clot (Clotting Cascade) Homo sapiens R-HSA-140877	2.11256	2.88771	0.550281	0.254889	['THBD', 'TFPI']	Reactome Pathways	0.593649	downregulated
MAPK1/MAPK3 signaling Homo sapiens R-HSA-5684996	1.34457	1.82739	0.553095	0.256894	['GRIN2A', 'PSMD5', 'PSME4', 'RASA2', 'FRS2', 'IQGAP1', 'FGF2', 'FGF23']	Reactome Pathways	0.590245	downregulated
Prolonged ERK activation events Homo sapiens R-HSA-169893	1.33875	1.8013	0.555124	0.260409	['GRIN2A', 'PSMD5', 'PSME4', 'RASA2', 'FRS2', 'IQGAP1', 'FGF2', 'FGF23']	Reactome Pathways	0.584344	downregulated
mRNA decay by 3' to 5' exoribonuclease Homo sapiens R-HSA-429958	3.55056	4.75479	0.555124	0.262064	['EXOSC8']	Reactome Pathways	0.581593	downregulated
NOTCH2 intracellular domain regulates transcription Homo sapiens R-HSA-2197563	3.55056	4.75479	0.555124	0.262064	['MAMLD1']	Reactome Pathways	0.581593	downregulated
Reduction of cytosolic Ca++ levels Homo sapiens R-HSA-418359	3.55056	4.75479	0.555124	0.262064	['ATP2A2']	Reactome Pathways	0.581593	downregulated
Physiological factors Homo sapiens R-HSA-5578768	3.55056	4.75479	0.555124	0.262064	['HIPK2']	Reactome Pathways	0.581593	downregulated
ATF6-alpha activates chaperones Homo sapiens R-HSA-381033	3.55056	4.75479	0.555124	0.262064	['NFYB']	Reactome Pathways	0.581593	downregulated
Signaling by Leptin Homo sapiens R-HSA-2586552	1.33299	1.77559	0.556681	0.263938	['GRIN2A', 'PSMD5', 'PSME4', 'RASA2', 'FRS2', 'IQGAP1', 'FGF2', 'FGF23']	Reactome Pathways	0.578498	downregulated
PKMTs methylate histone lysines Homo sapiens R-HSA-3214841	2.05686	2.73769	0.556681	0.264211	['ATF7IP', 'KMT2C']	Reactome Pathways	0.578049	downregulated
Costimulation by the CD28 family Homo sapiens R-HSA-388841	1.69985	2.2347	0.564272	0.26857	['PAK1', 'PIK3CA', 'PAK2']	Reactome Pathways	0.570943	downregulated
Adaptive Immune System Homo sapiens R-HSA-1280218	1.1668	1.51318	0.564272	0.273388	['HACE1', 'SMURF2', 'UBA6', 'FRS2', 'UBE2G1', 'KIF11', 'FGF2', 'SH3RF1', 'KIF15', 'TRAIP', 'UBE2W', 'PAK1', 'HECTD1', 'PIK3CA', 'HECTD2', 'PSMD5', 'HECW2', 'PSME4', 'TRIM37', 'PAK2', 'FGF23', 'PAG1']	Reactome Pathways	0.56322	downregulated
Pre-NOTCH Transcription and Translation Homo sapiens R-HSA-1912408	2.00402	2.59786	0.564272	0.273534	['TFDP1', 'MAMLD1']	Reactome Pathways	0.562988	downregulated
Signalling to RAS Homo sapiens R-HSA-167044	1.31598	1.70078	0.564272	0.274609	['GRIN2A', 'PSMD5', 'PSME4', 'RASA2', 'FRS2', 'IQGAP1', 'FGF2', 'FGF23']	Reactome Pathways	0.561286	downregulated
Metabolism of carbohydrates Homo sapiens R-HSA-71387	1.29095	1.66692	0.564272	0.274931	['NUP205', 'NUP107', 'SLC5A9', 'NUP188', 'NUP155', 'TPR', 'HAS3', 'NUP54', 'XYLB']	Reactome Pathways	0.560777	downregulated
Positive epigenetic regulation of rRNA expression Homo sapiens R-HSA-5250913	1.67548	2.16078	0.564272	0.275368	['TAF1B', 'DDX21', 'DEK']	Reactome Pathways	0.560087	downregulated
Initiation of Nuclear Envelope Reformation Homo sapiens R-HSA-2995383	3.25451	4.1368	0.564272	0.280523	['VRK1']	Reactome Pathways	0.552031	downregulated
Nuclear Envelope Reassembly Homo sapiens R-HSA-2995410	3.25451	4.1368	0.564272	0.280523	['VRK1']	Reactome Pathways	0.552031	downregulated
IRF3-mediated induction of type I IFN Homo sapiens R-HSA-3270619	3.25451	4.1368	0.564272	0.280523	['TBK1']	Reactome Pathways	0.552031	downregulated
Notch-HLH transcription pathway Homo sapiens R-HSA-350054	3.25451	4.1368	0.564272	0.280523	['MAMLD1']	Reactome Pathways	0.552031	downregulated
Activation of DNA fragmentation factor Homo sapiens R-HSA-211227	3.25451	4.1368	0.564272	0.280523	['KPNB1']	Reactome Pathways	0.552031	downregulated
Apoptosis induced DNA fragmentation Homo sapiens R-HSA-140342	3.25451	4.1368	0.564272	0.280523	['KPNB1']	Reactome Pathways	0.552031	downregulated
POU5F1 (OCT4), SOX2, NANOG activate genes related to proliferation Homo sapiens R-HSA-2892247	3.25451	4.1368	0.564272	0.280523	['FGF2']	Reactome Pathways	0.552031	downregulated
NICD traffics to nucleus Homo sapiens R-HSA-157052	3.25451	4.1368	0.564272	0.280523	['MAMLD1']	Reactome Pathways	0.552031	downregulated
Purine salvage Homo sapiens R-HSA-74217	3.25451	4.1368	0.564272	0.280523	['DCK']	Reactome Pathways	0.552031	downregulated
Signaling by Activin Homo sapiens R-HSA-1502540	3.25451	4.1368	0.564272	0.280523	['SMAD3']	Reactome Pathways	0.552031	downregulated
VEGFR2 mediated cell proliferation Homo sapiens R-HSA-5218921	1.30488	1.65276	0.564272	0.281788	['GRIN2A', 'PSMD5', 'PSME4', 'RASA2', 'FRS2', 'IQGAP1', 'FGF2', 'FGF23']	Reactome Pathways	0.550077	downregulated
Activation of gene expression by SREBF (SREBP) Homo sapiens R-HSA-2426168	1.95382	2.46734	0.564272	0.282852	['NFYB', 'ELOVL6']	Reactome Pathways	0.548441	downregulated
EPHB-mediated forward signaling Homo sapiens R-HSA-3928662	1.95382	2.46734	0.564272	0.282852	['TIAM1', 'PAK1']	Reactome Pathways	0.548441	downregulated
Netrin-1 signaling Homo sapiens R-HSA-373752	1.95382	2.46734	0.564272	0.282852	['ABLIM3', 'RGMB']	Reactome Pathways	0.548441	downregulated
Non-integrin membrane-ECM interactions Homo sapiens R-HSA-3000171	1.95382	2.46734	0.564272	0.282852	['THBS1', 'FGF2']	Reactome Pathways	0.548441	downregulated
G alpha (12/13) signalling events Homo sapiens R-HSA-416482	1.62877	2.02177	0.566832	0.289012	['TIAM1', 'PIK3CA', 'ECT2']	Reactome Pathways	0.539083	downregulated
Metabolism of proteins Homo sapiens R-HSA-392499	1.12839	1.39588	0.566832	0.290239	['NUP205', 'NUP107', 'NUP188', 'SMC5', 'SMC6', 'BRCA1', 'SMC3', 'THBS1', 'THSD4', 'AP3M1', 'WRN', 'TPR', 'PPP6R3', 'EXOSC8', 'PGM3', 'SULT1A3', 'IGFBP1', 'NOP58', 'NUP155', 'NFYB', 'TUBA4A', 'PIAS1', 'STAG2', 'EIF2S3', 'CCNE2', 'TRAPPC6B', 'UBA2', 'NUP54', 'SEC22B', 'SEC22A']	Reactome Pathways	0.537244	downregulated
Intra-Golgi and retrograde Golgi-to-ER traffic Homo sapiens R-HSA-6811442	1.35688	1.67392	0.566832	0.291227	['GOLGA4', 'GCC2', 'KIF11', 'KIF20B', 'SEC22B', 'KIF15']	Reactome Pathways	0.535768	downregulated
Formation of Incision Complex in GG-NER Homo sapiens R-HSA-5696395	1.90606	2.34533	0.566832	0.292159	['PARP2', 'PIAS1']	Reactome Pathways	0.534381	downregulated
TP53 Regulates Transcription of Cell Death Genes Homo sapiens R-HSA-5633008	1.90606	2.34533	0.566832	0.292159	['APAF1', 'CASP2']	Reactome Pathways	0.534381	downregulated
Golgi-to-ER retrograde transport Homo sapiens R-HSA-8856688	1.4755	1.79592	0.566832	0.29607	['KIF11', 'KIF20B', 'SEC22B', 'KIF15']	Reactome Pathways	0.528606	downregulated
Lysosphingolipid and LPA receptors Homo sapiens R-HSA-419408	3.00401	3.63158	0.566832	0.298522	['LPAR1']	Reactome Pathways	0.525024	downregulated
Removal of the Flap Intermediate Homo sapiens R-HSA-69166	3.00401	3.63158	0.566832	0.298522	['POLA1']	Reactome Pathways	0.525024	downregulated
Regulation of IFNG signaling Homo sapiens R-HSA-877312	3.00401	3.63158	0.566832	0.298522	['PIAS1']	Reactome Pathways	0.525024	downregulated
AMER1 mutants destabilize the destruction complex Homo sapiens R-HSA-4839748	3.00401	3.63158	0.566832	0.298522	['APC']	Reactome Pathways	0.525024	downregulated
Truncations of AMER1 destabilize the destruction complex Homo sapiens R-HSA-5467348	3.00401	3.63158	0.566832	0.298522	['APC']	Reactome Pathways	0.525024	downregulated
truncated APC mutants destabilize the destruction complex Homo sapiens R-HSA-4839744	3.00401	3.63158	0.566832	0.298522	['APC']	Reactome Pathways	0.525024	downregulated
AXIN missense mutants destabilize the destruction complex Homo sapiens R-HSA-5467340	3.00401	3.63158	0.566832	0.298522	['APC']	Reactome Pathways	0.525024	downregulated
AXIN mutants destabilize the destruction complex, activating WNT signaling Homo sapiens R-HSA-4839735	3.00401	3.63158	0.566832	0.298522	['APC']	Reactome Pathways	0.525024	downregulated
APC truncation mutants have impaired AXIN binding Homo sapiens R-HSA-5467337	3.00401	3.63158	0.566832	0.298522	['APC']	Reactome Pathways	0.525024	downregulated
TRAF3-dependent IRF activation pathway Homo sapiens R-HSA-918233	3.00401	3.63158	0.566832	0.298522	['TBK1']	Reactome Pathways	0.525024	downregulated
Bile salt and organic anion SLC transporters Homo sapiens R-HSA-425471	3.00401	3.63158	0.566832	0.298522	['SLC16A7']	Reactome Pathways	0.525024	downregulated
SEMA3A-Plexin repulsion signaling by inhibiting Integrin adhesion Homo sapiens R-HSA-399955	3.00401	3.63158	0.566832	0.298522	['SEMA3A']	Reactome Pathways	0.525024	downregulated
SUMOylation of transcription factors Homo sapiens R-HSA-3232118	3.00401	3.63158	0.566832	0.298522	['PIAS1']	Reactome Pathways	0.525024	downregulated
DCC mediated attractive signaling Homo sapiens R-HSA-418885	3.00401	3.63158	0.566832	0.298522	['ABLIM3']	Reactome Pathways	0.525024	downregulated
Signalling to ERKs Homo sapiens R-HSA-187687	1.27792	1.53881	0.568166	0.299946	['GRIN2A', 'PSMD5', 'PSME4', 'RASA2', 'FRS2', 'IQGAP1', 'FGF2', 'FGF23']	Reactome Pathways	0.522957	downregulated
Phospholipase C-mediated cascade; FGFR3 Homo sapiens R-HSA-5654227	1.86059	2.23113	0.569645	0.301449	['FGF2', 'FGF23']	Reactome Pathways	0.520786	downregulated
Signaling by PDGF Homo sapiens R-HSA-186797	1.22014	1.4548	0.572177	0.303515	['GRIN2A', 'PIK3CA', 'PSMD5', 'PSME4', 'PDGFC', 'RASA2', 'FRS2', 'IQGAP1', 'FGF2', 'FGF23', 'THBS1']	Reactome Pathways	0.51782	downregulated
Axon guidance Homo sapiens R-HSA-422475	1.17526	1.37959	0.573208	0.30917	['SEMA3A', 'FRS2', 'IQGAP1', 'RGMB', 'FGF2', 'TIAM1', 'GRIN2A', 'PAK1', 'ABLIM3', 'PSMD5', 'PSME4', 'RASA2', 'SRGAP1', 'PAK2', 'FGF23']	Reactome Pathways	0.509802	downregulated
RMTs methylate histone arginines Homo sapiens R-HSA-3214858	1.81722	2.12409	0.573208	0.310718	['PBRM1', 'ARID2']	Reactome Pathways	0.507633	downregulated
NRAGE signals death through JNK Homo sapiens R-HSA-193648	1.81722	2.12409	0.573208	0.310718	['TIAM1', 'ECT2']	Reactome Pathways	0.507633	downregulated
CREB phosphorylation through the activation of CaMKII Homo sapiens R-HSA-442729	2.78929	3.21268	0.573208	0.316071	['GRIN2A']	Reactome Pathways	0.500215	downregulated
Constitutive Signaling by EGFRvIII Homo sapiens R-HSA-5637810	2.78929	3.21268	0.573208	0.316071	['PIK3CA']	Reactome Pathways	0.500215	downregulated
Signaling by EGFRvIII in Cancer Homo sapiens R-HSA-5637812	2.78929	3.21268	0.573208	0.316071	['PIK3CA']	Reactome Pathways	0.500215	downregulated
S37 mutants of beta-catenin aren't phosphorylated Homo sapiens R-HSA-5358749	2.78929	3.21268	0.573208	0.316071	['APC']	Reactome Pathways	0.500215	downregulated
Misspliced GSK3beta mutants stabilize beta-catenin Homo sapiens R-HSA-5339716	2.78929	3.21268	0.573208	0.316071	['APC']	Reactome Pathways	0.500215	downregulated
Activation of BAD and translocation to mitochondria Homo sapiens R-HSA-111447	2.78929	3.21268	0.573208	0.316071	['PPP3R1']	Reactome Pathways	0.500215	downregulated
Regulation of innate immune responses to cytosolic DNA Homo sapiens R-HSA-3134975	2.78929	3.21268	0.573208	0.316071	['TBK1']	Reactome Pathways	0.500215	downregulated
Processive synthesis on the lagging strand Homo sapiens R-HSA-69183	2.78929	3.21268	0.573208	0.316071	['POLA1']	Reactome Pathways	0.500215	downregulated
Association of licensing factors with the pre-replicative complex Homo sapiens R-HSA-69298	2.78929	3.21268	0.573208	0.316071	['CDC6']	Reactome Pathways	0.500215	downregulated
S33 mutants of beta-catenin aren't phosphorylated Homo sapiens R-HSA-5358747	2.78929	3.21268	0.573208	0.316071	['APC']	Reactome Pathways	0.500215	downregulated
S45 mutants of beta-catenin aren't phosphorylated Homo sapiens R-HSA-5358751	2.78929	3.21268	0.573208	0.316071	['APC']	Reactome Pathways	0.500215	downregulated
phosphorylation site mutants of CTNNB1 are not targeted to the proteasome by the destruction complex Homo sapiens R-HSA-4839743	2.78929	3.21268	0.573208	0.316071	['APC']	Reactome Pathways	0.500215	downregulated
T41 mutants of beta-catenin aren't phosphorylated Homo sapiens R-HSA-5358752	2.78929	3.21268	0.573208	0.316071	['APC']	Reactome Pathways	0.500215	downregulated
Regulation of APC/C activators between G1/S and early anaphase Homo sapiens R-HSA-176408	1.54273	1.77516	0.573208	0.316428	['PSMD5', 'PSME4', 'FBXO5']	Reactome Pathways	0.499725	downregulated
Phospholipase C-mediated cascade; FGFR4 Homo sapiens R-HSA-5654228	1.77583	2.02365	0.57828	0.319962	['FGF2', 'FGF23']	Reactome Pathways	0.494902	downregulated
Phospholipase C-mediated cascade: FGFR1 Homo sapiens R-HSA-5654219	1.73628	1.92929	0.587602	0.329175	['FGF2', 'FGF23']	Reactome Pathways	0.482573	downregulated
TGF-beta receptor signaling in EMT (epithelial to mesenchymal transition) Homo sapiens R-HSA-2173791	2.60321	2.8611	0.587602	0.333182	['TGFBR2']	Reactome Pathways	0.477319	downregulated
Metabolism of folate and pterines Homo sapiens R-HSA-196757	2.60321	2.8611	0.587602	0.333182	['SLC25A32']	Reactome Pathways	0.477319	downregulated
STING mediated induction of host immune responses Homo sapiens R-HSA-1834941	2.60321	2.8611	0.587602	0.333182	['TBK1']	Reactome Pathways	0.477319	downregulated
PI3K events in ERBB2 signaling Homo sapiens R-HSA-1963642	2.60321	2.8611	0.587602	0.333182	['PIK3CA']	Reactome Pathways	0.477319	downregulated
Cell-extracellular matrix interactions Homo sapiens R-HSA-446353	2.60321	2.8611	0.587602	0.333182	['LIMS1']	Reactome Pathways	0.477319	downregulated
CRMPs in Sema3A signaling Homo sapiens R-HSA-399956	2.60321	2.8611	0.587602	0.333182	['SEMA3A']	Reactome Pathways	0.477319	downregulated
Chromatin organization Homo sapiens R-HSA-4839726	1.25008	1.36112	0.587602	0.336611	['ATF7IP', 'PBRM1', 'ZZZ3', 'KMT2C', 'ARID4A', 'MSL3', 'ARID2']	Reactome Pathways	0.472871	downregulated
Chromatin modifying enzymes Homo sapiens R-HSA-3247509	1.25008	1.36112	0.587602	0.336611	['ATF7IP', 'PBRM1', 'ZZZ3', 'KMT2C', 'ARID4A', 'MSL3', 'ARID2']	Reactome Pathways	0.472871	downregulated
Signalling by NGF Homo sapiens R-HSA-166520	1.16446	1.26701	0.587602	0.336866	['ATF1', 'FRS2', 'IQGAP1', 'FGF2', 'TIAM1', 'GRIN2A', 'PIK3CA', 'PSMD5', 'PSME4', 'RASA2', 'CASP2', 'ECT2', 'FGF23']	Reactome Pathways	0.472543	downregulated
Degradation of beta-catenin by the destruction complex Homo sapiens R-HSA-195253	1.48392	1.6139	0.587602	0.337025	['APC', 'PSMD5', 'PSME4']	Reactome Pathways	0.472337	downregulated
p75 NTR receptor-mediated signalling Homo sapiens R-HSA-193704	1.46529	1.56412	0.587602	0.343886	['TIAM1', 'CASP2', 'ECT2']	Reactome Pathways	0.463585	downregulated
Phospholipase C-mediated cascade; FGFR2 Homo sapiens R-HSA-5654221	1.66222	1.75699	0.587602	0.347493	['FGF2', 'FGF23']	Reactome Pathways	0.459054	downregulated
Cross-presentation of soluble exogenous antigens (endosomes) Homo sapiens R-HSA-1236978	1.66222	1.75699	0.587602	0.347493	['PSMD5', 'PSME4']	Reactome Pathways	0.459054	downregulated
Retrograde transport at the Trans-Golgi-Network Homo sapiens R-HSA-6811440	1.66222	1.75699	0.587602	0.347493	['GOLGA4', 'GCC2']	Reactome Pathways	0.459054	downregulated
NCAM signaling for neurite out-growth Homo sapiens R-HSA-375165	1.21271	1.27922	0.587602	0.348244	['GRIN2A', 'PSMD5', 'PSME4', 'RASA2', 'FRS2', 'IQGAP1', 'FGF2', 'FGF23']	Reactome Pathways	0.458116	downregulated
Downstream signaling events of B Cell Receptor (BCR) Homo sapiens R-HSA-1168372	1.2612	1.33002	0.587602	0.348344	['PIK3CA', 'PSMD5', 'PSME4', 'FRS2', 'FGF2', 'FGF23']	Reactome Pathways	0.457992	downregulated
Zinc transporters Homo sapiens R-HSA-435354	2.44038	2.5629	0.587602	0.349866	['SLC39A10']	Reactome Pathways	0.456099	downregulated
ABC transporters in lipid homeostasis Homo sapiens R-HSA-1369062	2.44038	2.5629	0.587602	0.349866	['ABCA6']	Reactome Pathways	0.456099	downregulated
Hyaluronan metabolism Homo sapiens R-HSA-2142845	2.44038	2.5629	0.587602	0.349866	['HAS3']	Reactome Pathways	0.456099	downregulated
KSRP (KHSRP) binds and destabilizes mRNA Homo sapiens R-HSA-450604	2.44038	2.5629	0.587602	0.349866	['EXOSC8']	Reactome Pathways	0.456099	downregulated
Tristetraprolin (TTP, ZFP36) binds and destabilizes mRNA Homo sapiens R-HSA-450513	2.44038	2.5629	0.587602	0.349866	['EXOSC8']	Reactome Pathways	0.456099	downregulated
Butyrate Response Factor 1 (BRF1) binds and destabilizes mRNA Homo sapiens R-HSA-450385	2.44038	2.5629	0.587602	0.349866	['EXOSC8']	Reactome Pathways	0.456099	downregulated
Ras activation uopn Ca2+ infux through NMDA receptor Homo sapiens R-HSA-442982	2.44038	2.5629	0.587602	0.349866	['GRIN2A']	Reactome Pathways	0.456099	downregulated
Unblocking of NMDA receptor, glutamate binding and activation Homo sapiens R-HSA-438066	2.44038	2.5629	0.587602	0.349866	['GRIN2A']	Reactome Pathways	0.456099	downregulated
Beta-catenin phosphorylation cascade Homo sapiens R-HSA-196299	2.44038	2.5629	0.587602	0.349866	['APC']	Reactome Pathways	0.456099	downregulated
Metabolism of polyamines Homo sapiens R-HSA-351202	1.44713	1.51617	0.587602	0.350741	['MTAP', 'PSMD5', 'PSME4']	Reactome Pathways	0.455014	downregulated
Deadenylation-dependent mRNA decay Homo sapiens R-HSA-429914	1.62751	1.67824	0.587602	0.35659	['CNOT6L', 'EXOSC8']	Reactome Pathways	0.447831	downregulated
Ubiquitin-dependent degradation of Cyclin D1 Homo sapiens R-HSA-69229	1.62751	1.67824	0.587602	0.35659	['PSMD5', 'PSME4']	Reactome Pathways	0.447831	downregulated
Ubiquitin-dependent degradation of Cyclin D Homo sapiens R-HSA-75815	1.62751	1.67824	0.587602	0.35659	['PSMD5', 'PSME4']	Reactome Pathways	0.447831	downregulated
Regulation of ornithine decarboxylase (ODC) Homo sapiens R-HSA-350562	1.62751	1.67824	0.587602	0.35659	['PSMD5', 'PSME4']	Reactome Pathways	0.447831	downregulated
APC/C-mediated degradation of cell cycle proteins Homo sapiens R-HSA-174143	1.42941	1.46997	0.587602	0.357587	['PSMD5', 'PSME4', 'FBXO5']	Reactome Pathways	0.446618	downregulated
Hedgehog 'on' state Homo sapiens R-HSA-5632684	1.42941	1.46997	0.587602	0.357587	['SMURF2', 'PSMD5', 'PSME4']	Reactome Pathways	0.446618	downregulated
Regulation of mitotic cell cycle Homo sapiens R-HSA-453276	1.42941	1.46997	0.587602	0.357587	['PSMD5', 'PSME4', 'FBXO5']	Reactome Pathways	0.446618	downregulated
PI3K events in ERBB4 signaling Homo sapiens R-HSA-1250342	1.32463	1.33825	0.587602	0.364115	['PIK3CA', 'FRS2', 'FGF2', 'FGF23']	Reactome Pathways	0.438761	downregulated
PI-3K cascade:FGFR4 Homo sapiens R-HSA-5654720	1.32463	1.33825	0.587602	0.364115	['PIK3CA', 'FRS2', 'FGF2', 'FGF23']	Reactome Pathways	0.438761	downregulated
PIP3 activates AKT signaling Homo sapiens R-HSA-1257604	1.32463	1.33825	0.587602	0.364115	['PIK3CA', 'FRS2', 'FGF2', 'FGF23']	Reactome Pathways	0.438761	downregulated
PI-3K cascade:FGFR2 Homo sapiens R-HSA-5654695	1.32463	1.33825	0.587602	0.364115	['PIK3CA', 'FRS2', 'FGF2', 'FGF23']	Reactome Pathways	0.438761	downregulated
PI-3K cascade:FGFR1 Homo sapiens R-HSA-5654689	1.32463	1.33825	0.587602	0.364115	['PIK3CA', 'FRS2', 'FGF2', 'FGF23']	Reactome Pathways	0.438761	downregulated
PI-3K cascade:FGFR3 Homo sapiens R-HSA-5654710	1.32463	1.33825	0.587602	0.364115	['PIK3CA', 'FRS2', 'FGF2', 'FGF23']	Reactome Pathways	0.438761	downregulated
Regulation of mRNA stability by proteins that bind AU-rich elements Homo sapiens R-HSA-450531	1.41211	1.42544	0.587602	0.364424	['PSMD5', 'PSME4', 'EXOSC8']	Reactome Pathways	0.438393	downregulated
Cell junction organization Homo sapiens R-HSA-446728	1.41211	1.42544	0.587602	0.364424	['CLDN11', 'MPP5', 'LIMS1']	Reactome Pathways	0.438393	downregulated
mRNA 3'-end processing Homo sapiens R-HSA-72187	1.59421	1.60394	0.587602	0.365641	['THOC2', 'THOC7']	Reactome Pathways	0.436945	downregulated
Vpu mediated degradation of CD4 Homo sapiens R-HSA-180534	1.59421	1.60394	0.587602	0.365641	['PSMD5', 'PSME4']	Reactome Pathways	0.436945	downregulated
Autodegradation of the E3 ubiquitin ligase COP1 Homo sapiens R-HSA-349425	1.59421	1.60394	0.587602	0.365641	['PSMD5', 'PSME4']	Reactome Pathways	0.436945	downregulated
Cargo trafficking to the periciliary membrane Homo sapiens R-HSA-5620920	1.59421	1.60394	0.587602	0.365641	['RP2', 'ASAP1']	Reactome Pathways	0.436945	downregulated
Post-Elongation Processing of Intron-Containing pre-mRNA Homo sapiens R-HSA-112296	1.59421	1.60394	0.587602	0.365641	['THOC2', 'THOC7']	Reactome Pathways	0.436945	downregulated
Ion homeostasis Homo sapiens R-HSA-5578775	1.59421	1.60394	0.587602	0.365641	['ATP2A2', 'ABCC9']	Reactome Pathways	0.436945	downregulated
Synthesis of PIPs at the Golgi membrane Homo sapiens R-HSA-1660514	2.29671	2.30764	0.587602	0.366133	['PIKFYVE']	Reactome Pathways	0.436361	downregulated
Cytosolic sulfonation of small molecules Homo sapiens R-HSA-156584	2.29671	2.30764	0.587602	0.366133	['SULT1A3']	Reactome Pathways	0.436361	downregulated
Activation of IRF3/IRF7 mediated by TBK1/IKK epsilon Homo sapiens R-HSA-936964	2.29671	2.30764	0.587602	0.366133	['TBK1']	Reactome Pathways	0.436361	downregulated
Tie2 Signaling Homo sapiens R-HSA-210993	2.29671	2.30764	0.587602	0.366133	['PIK3CA']	Reactome Pathways	0.436361	downregulated
Signaling by cytosolic FGFR1 fusion mutants Homo sapiens R-HSA-1839117	2.29671	2.30764	0.587602	0.366133	['PIK3CA']	Reactome Pathways	0.436361	downregulated
Pre-NOTCH Processing in Golgi Homo sapiens R-HSA-1912420	2.29671	2.30764	0.587602	0.366133	['ATP2A2']	Reactome Pathways	0.436361	downregulated
Regulation of signaling by CBL Homo sapiens R-HSA-912631	2.29671	2.30764	0.587602	0.366133	['PIK3CA']	Reactome Pathways	0.436361	downregulated
Immune System Homo sapiens R-HSA-168256	1.06727	1.05893	0.593396	0.370766	['ATF1', 'NCKAP1', 'NUP205', 'NUP107', 'NUP188', 'UBA6', 'IQGAP1', 'KIF11', 'FGF2', 'SH3RF1', 'KIF15', 'PPP3R1', 'GRIN2A', 'PAK1', 'TBK1', 'HECTD1', 'HECTD2', 'PSMD5', 'TPR', 'CASP2', 'KPNA4', 'PAK2', 'FGF23', 'PAG1', 'HACE1', 'NUP155', 'SMURF2', 'NFATC2', 'FRS2', 'UBE2G1', 'PIAS1', 'TRAIP', 'IL1A', 'UBE2W', 'PIK3CA', 'HECW2', 'PSME4', 'RASA2', 'TRIM37', 'NUP54', 'KPNB1']	Reactome Pathways	0.4309	downregulated
Metabolism of nucleotides Homo sapiens R-HSA-15869	1.39523	1.38251	0.593396	0.371249	['RRM1', 'RRM2', 'DCK']	Reactome Pathways	0.430335	downregulated
p53-Independent DNA Damage Response Homo sapiens R-HSA-69610	1.56225	1.53379	0.595199	0.374643	['PSMD5', 'PSME4']	Reactome Pathways	0.426382	downregulated
p53-Independent G1/S DNA damage checkpoint Homo sapiens R-HSA-69613	1.56225	1.53379	0.595199	0.374643	['PSMD5', 'PSME4']	Reactome Pathways	0.426382	downregulated
Ubiquitin Mediated Degradation of Phosphorylated Cdc25A Homo sapiens R-HSA-69601	1.56225	1.53379	0.595199	0.374643	['PSMD5', 'PSME4']	Reactome Pathways	0.426382	downregulated
PI3K/AKT activation Homo sapiens R-HSA-198203	1.29159	1.24577	0.598432	0.381163	['PIK3CA', 'FRS2', 'FGF2', 'FGF23']	Reactome Pathways	0.418889	downregulated
Citric acid cycle (TCA cycle) Homo sapiens R-HSA-71403	2.169	2.08734	0.598432	0.381994	['SUCLA2']	Reactome Pathways	0.417944	downregulated
Constitutive Signaling by Ligand-Responsive EGFR Cancer Variants Homo sapiens R-HSA-1236382	2.169	2.08734	0.598432	0.381994	['PIK3CA']	Reactome Pathways	0.417944	downregulated
Signaling by Ligand-Responsive EGFR Variants in Cancer Homo sapiens R-HSA-5637815	2.169	2.08734	0.598432	0.381994	['PIK3CA']	Reactome Pathways	0.417944	downregulated
Signaling by EGFR in Cancer Homo sapiens R-HSA-1643713	2.169	2.08734	0.598432	0.381994	['PIK3CA']	Reactome Pathways	0.417944	downregulated
Signaling by NODAL Homo sapiens R-HSA-1181150	2.169	2.08734	0.598432	0.381994	['SMAD3']	Reactome Pathways	0.417944	downregulated
Signaling by FGFR2 IIIa TM Homo sapiens R-HSA-8851708	2.169	2.08734	0.598432	0.381994	['FGF2']	Reactome Pathways	0.417944	downregulated
Vif-mediated degradation of APOBEC3G Homo sapiens R-HSA-180585	1.53154	1.46748	0.599743	0.383592	['PSMD5', 'PSME4']	Reactome Pathways	0.41613	downregulated
AUF1 (hnRNP D0) binds and destabilizes mRNA Homo sapiens R-HSA-450408	1.50201	1.40476	0.611222	0.392485	['PSMD5', 'PSME4']	Reactome Pathways	0.406176	downregulated
Stabilization of p53 Homo sapiens R-HSA-69541	1.50201	1.40476	0.611222	0.392485	['PSMD5', 'PSME4']	Reactome Pathways	0.406176	downregulated
Signaling by EGFR Homo sapiens R-HSA-177929	1.1331	1.05042	0.614668	0.395726	['GRIN2A', 'PIK3CA', 'PSMD5', 'PSME4', 'RASA2', 'FRS2', 'IQGAP1', 'FGF2', 'FGF23', 'PAG1']	Reactome Pathways	0.402606	downregulated
Gastrin-CREB signalling pathway via PKC and MAPK Homo sapiens R-HSA-881907	1.1171	1.03408	0.614668	0.396258	['UTS2B', 'GRIN2A', 'EDN1', 'PIK3CA', 'PSMD5', 'PSME4', 'RASA2', 'LPAR1', 'FRS2', 'IQGAP1', 'FGF2', 'FGF23']	Reactome Pathways	0.402022	downregulated
Synthesis of PC Homo sapiens R-HSA-1483191	2.05474	1.89584	0.615319	0.397459	['ABHD3']	Reactome Pathways	0.400708	downregulated
PCP/CE pathway Homo sapiens R-HSA-4086400	1.33153	1.22543	0.615556	0.398393	['SMURF2', 'PSMD5', 'PSME4']	Reactome Pathways	0.399689	downregulated
Hh mutants that don't undergo autocatalytic processing are degraded by ERAD Homo sapiens R-HSA-5362768	1.47359	1.34538	0.618866	0.40132	['PSMD5', 'PSME4']	Reactome Pathways	0.396509	downregulated
Degradation of DVL Homo sapiens R-HSA-4641258	1.44623	1.28912	0.629999	0.410094	['PSMD5', 'PSME4']	Reactome Pathways	0.387116	downregulated
Regulation of Insulin-like Growth Factor (IGF) transport and uptake by Insulin-like Growth Factor Binding Proteins (IGFBPs) Homo sapiens R-HSA-381426	1.9519	1.72827	0.629999	0.412537	['IGFBP1']	Reactome Pathways	0.384537	downregulated
VxPx cargo-targeting to cilium Homo sapiens R-HSA-5620916	1.9519	1.72827	0.629999	0.412537	['ASAP1']	Reactome Pathways	0.384537	downregulated
Synthesis of very long-chain fatty acyl-CoAs Homo sapiens R-HSA-75876	1.9519	1.72827	0.629999	0.412537	['ELOVL6']	Reactome Pathways	0.384537	downregulated
Signal transduction by L1 Homo sapiens R-HSA-445144	1.9519	1.72827	0.629999	0.412537	['PAK1']	Reactome Pathways	0.384537	downregulated
ER to Golgi Anterograde Transport Homo sapiens R-HSA-199977	1.23019	1.08168	0.632656	0.41508	['TRAPPC6B', 'PPP6R3', 'SEC22B', 'SEC22A']	Reactome Pathways	0.381868	downregulated
Transmembrane transport of small molecules Homo sapiens R-HSA-382551	1.08222	0.949015	0.63293	0.416063	['NUP205', 'NUP107', 'NUP188', 'NUP155', 'ABCA6', 'SLC39A10', 'ATP2A2', 'ABCC9', 'SLC4A7', 'SLC5A9', 'EIF2S3', 'TPR', 'SLC16A7', 'NUP54', 'RAB11FIP2', 'ABCE1']	Reactome Pathways	0.380841	downregulated
Hh mutants abrogate ligand secretion Homo sapiens R-HSA-5387390	1.41986	1.23578	0.635528	0.418805	['PSMD5', 'PSME4']	Reactome Pathways	0.377988	downregulated
Chaperonin-mediated protein folding Homo sapiens R-HSA-390466	1.27338	1.08897	0.635528	0.425207	['AP3M1', 'CCNE2', 'TUBA4A']	Reactome Pathways	0.371399	downregulated
EPH-Ephrin signaling Homo sapiens R-HSA-2682334	1.27338	1.08897	0.635528	0.425207	['TIAM1', 'PAK1', 'PAK2']	Reactome Pathways	0.371399	downregulated
Signaling by SCF-KIT Homo sapiens R-HSA-1433557	1.11279	0.951596	0.635528	0.425222	['GRIN2A', 'PIK3CA', 'PSMD5', 'PSME4', 'RASA2', 'FRS2', 'IQGAP1', 'FGF2', 'FGF23']	Reactome Pathways	0.371385	downregulated
SALM protein interactions at the synapse Homo sapiens R-HSA-8849932	1.85886	1.5808	0.635528	0.427239	['GRIN2A']	Reactome Pathways	0.369329	downregulated
RA biosynthesis pathway Homo sapiens R-HSA-5365859	1.85886	1.5808	0.635528	0.427239	['DHRS9']	Reactome Pathways	0.369329	downregulated
Post-chaperonin tubulin folding pathway Homo sapiens R-HSA-389977	1.85886	1.5808	0.635528	0.427239	['TUBA4A']	Reactome Pathways	0.369329	downregulated
Common Pathway of Fibrin Clot Formation Homo sapiens R-HSA-140875	1.85886	1.5808	0.635528	0.427239	['THBD']	Reactome Pathways	0.369329	downregulated
CD28 dependent PI3K/Akt signaling Homo sapiens R-HSA-389357	1.85886	1.5808	0.635528	0.427239	['PIK3CA']	Reactome Pathways	0.369329	downregulated
rRNA modification in the nucleus Homo sapiens R-HSA-6790901	1.39443	1.18516	0.635528	0.427449	['UTP15', 'NOP58']	Reactome Pathways	0.369115	downregulated
Recruitment and ATM-mediated phosphorylation of repair and signaling proteins at DNA double strand breaks Homo sapiens R-HSA-5693565	1.39443	1.18516	0.635528	0.427449	['FAM175A', 'BRCA1']	Reactome Pathways	0.369115	downregulated
NIK-->noncanonical NF-kB signaling Homo sapiens R-HSA-5676590	1.39443	1.18516	0.635528	0.427449	['PSMD5', 'PSME4']	Reactome Pathways	0.369115	downregulated
Degradation of GLI1 by the proteasome Homo sapiens R-HSA-5610780	1.3699	1.13709	0.641023	0.436026	['PSMD5', 'PSME4']	Reactome Pathways	0.360488	downregulated
GLI3 is processed to GLI3R by the proteasome Homo sapiens R-HSA-5610785	1.3699	1.13709	0.641023	0.436026	['PSMD5', 'PSME4']	Reactome Pathways	0.360488	downregulated
Degradation of GLI2 by the proteasome Homo sapiens R-HSA-5610783	1.3699	1.13709	0.641023	0.436026	['PSMD5', 'PSME4']	Reactome Pathways	0.360488	downregulated
The role of GTSE1 in G2/M progression after G2 checkpoint Homo sapiens R-HSA-8852276	1.3699	1.13709	0.641023	0.436026	['PSMD5', 'PSME4']	Reactome Pathways	0.360488	downregulated
SCF(Skp2)-mediated degradation of p27/p21 Homo sapiens R-HSA-187577	1.3699	1.13709	0.641023	0.436026	['CCNE2', 'PSMD5']	Reactome Pathways	0.360488	downregulated
DNA Double Strand Break Response Homo sapiens R-HSA-5693606	1.3699	1.13709	0.641023	0.436026	['FAM175A', 'BRCA1']	Reactome Pathways	0.360488	downregulated
Downstream signaling of activated FGFR3 Homo sapiens R-HSA-5654708	1.09865	0.903348	0.642459	0.439449	['GRIN2A', 'PIK3CA', 'PSMD5', 'PSME4', 'RASA2', 'FRS2', 'IQGAP1', 'FGF2', 'FGF23']	Reactome Pathways	0.357092	downregulated
Downstream signaling of activated FGFR4 Homo sapiens R-HSA-5654716	1.09865	0.903348	0.642459	0.439449	['GRIN2A', 'PIK3CA', 'PSMD5', 'PSME4', 'RASA2', 'FRS2', 'IQGAP1', 'FGF2', 'FGF23']	Reactome Pathways	0.357092	downregulated
Downstream signaling of activated FGFR2 Homo sapiens R-HSA-5654696	1.09865	0.903348	0.642459	0.439449	['GRIN2A', 'PIK3CA', 'PSMD5', 'PSME4', 'RASA2', 'FRS2', 'IQGAP1', 'FGF2', 'FGF23']	Reactome Pathways	0.357092	downregulated
The canonical retinoid cycle in rods (twilight vision) Homo sapiens R-HSA-2453902	1.77428	1.45031	0.642737	0.441574	['DHRS9']	Reactome Pathways	0.354997	downregulated
Deadenylation of mRNA Homo sapiens R-HSA-429947	1.77428	1.45031	0.642737	0.441574	['CNOT6L']	Reactome Pathways	0.354997	downregulated
Signaling by ERBB4 Homo sapiens R-HSA-1236394	1.09517	0.891671	0.642737	0.443	['GRIN2A', 'PIK3CA', 'PSMD5', 'PSME4', 'RASA2', 'FRS2', 'IQGAP1', 'FGF2', 'FGF23']	Reactome Pathways	0.353596	downregulated
Cleavage of Growing Transcript in the Termination Region Homo sapiens R-HSA-109688	1.34621	1.09142	0.642737	0.444532	['THOC2', 'THOC7']	Reactome Pathways	0.352097	downregulated
Post-Elongation Processing of the Transcript Homo sapiens R-HSA-76044	1.34621	1.09142	0.642737	0.444532	['THOC2', 'THOC7']	Reactome Pathways	0.352097	downregulated
RNA Polymerase II Transcription Termination Homo sapiens R-HSA-73856	1.34621	1.09142	0.642737	0.444532	['THOC2', 'THOC7']	Reactome Pathways	0.352097	downregulated
Downstream signaling of activated FGFR1 Homo sapiens R-HSA-5654687	1.08828	0.868766	0.6468	0.450095	['GRIN2A', 'PIK3CA', 'PSMD5', 'PSME4', 'RASA2', 'FRS2', 'IQGAP1', 'FGF2', 'FGF23']	Reactome Pathways	0.346695	downregulated
Signaling by FGFR4 Homo sapiens R-HSA-5654743	1.08828	0.868766	0.6468	0.450095	['GRIN2A', 'PIK3CA', 'PSMD5', 'PSME4', 'RASA2', 'FRS2', 'IQGAP1', 'FGF2', 'FGF23']	Reactome Pathways	0.346695	downregulated
Downstream TCR signaling Homo sapiens R-HSA-202424	1.22007	0.969916	0.6468	0.451596	['PIK3CA', 'PSMD5', 'PSME4']	Reactome Pathways	0.34525	downregulated
Dectin-1 mediated noncanonical NF-kB signaling Homo sapiens R-HSA-5607761	1.32333	1.04799	0.6468	0.452967	['PSMD5', 'PSME4']	Reactome Pathways	0.343933	downregulated
Cell-cell junction organization Homo sapiens R-HSA-421270	1.32333	1.04799	0.6468	0.452967	['CLDN11', 'MPP5']	Reactome Pathways	0.343933	downregulated
Signaling by FGFR3 Homo sapiens R-HSA-5654741	1.08486	0.857534	0.6468	0.453638	['GRIN2A', 'PIK3CA', 'PSMD5', 'PSME4', 'RASA2', 'FRS2', 'IQGAP1', 'FGF2', 'FGF23']	Reactome Pathways	0.34329	downregulated
Phosphorylation of CD3 and TCR zeta chains Homo sapiens R-HSA-202427	1.69705	1.3343	0.6468	0.455551	['PAG1']	Reactome Pathways	0.341463	downregulated
DARPP-32 events Homo sapiens R-HSA-180024	1.69705	1.3343	0.6468	0.455551	['PPP3R1']	Reactome Pathways	0.341463	downregulated
Nuclear Events (kinase and transcription factor activation) Homo sapiens R-HSA-198725	1.69705	1.3343	0.6468	0.455551	['ATF1']	Reactome Pathways	0.341463	downregulated
Pyrimidine metabolism Homo sapiens R-HSA-73848	1.69705	1.3343	0.6468	0.455551	['DCK']	Reactome Pathways	0.341463	downregulated
NGF signalling via TRKA from the plasma membrane Homo sapiens R-HSA-187037	1.07289	0.834098	0.651353	0.459584	['ATF1', 'GRIN2A', 'PIK3CA', 'PSMD5', 'PSME4', 'RASA2', 'FRS2', 'IQGAP1', 'FGF2', 'FGF23']	Reactome Pathways	0.337635	downregulated
Diseases associated with O-glycosylation of proteins Homo sapiens R-HSA-3906995	1.3012	1.00667	0.651481	0.461328	['THBS1', 'THSD4']	Reactome Pathways	0.33599	downregulated
FCERI mediated Ca+2 mobilization Homo sapiens R-HSA-2871809	1.3012	1.00667	0.651481	0.461328	['PPP3R1', 'NFATC2']	Reactome Pathways	0.33599	downregulated
Signaling by FGFR1 Homo sapiens R-HSA-5654736	1.07474	0.824693	0.652599	0.464246	['GRIN2A', 'PIK3CA', 'PSMD5', 'PSME4', 'RASA2', 'FRS2', 'IQGAP1', 'FGF2', 'FGF23']	Reactome Pathways	0.333252	downregulated
Protein folding Homo sapiens R-HSA-391251	1.19505	0.916087	0.652599	0.464604	['AP3M1', 'CCNE2', 'TUBA4A']	Reactome Pathways	0.332917	downregulated
Transport of glucose and other sugars, bile salts and organic acids, metal ions and amine compounds Homo sapiens R-HSA-425366	1.19505	0.916087	0.652599	0.464604	['SLC5A9', 'SLC16A7', 'SLC39A10']	Reactome Pathways	0.332917	downregulated
Metal ion SLC transporters Homo sapiens R-HSA-425410	1.62625	1.2307	0.654966	0.469178	['SLC39A10']	Reactome Pathways	0.328662	downregulated
Formation of tubulin folding intermediates by CCT/TriC Homo sapiens R-HSA-389960	1.62625	1.2307	0.654966	0.469178	['TUBA4A']	Reactome Pathways	0.328662	downregulated
Sulfur amino acid metabolism Homo sapiens R-HSA-1614635	1.62625	1.2307	0.654966	0.469178	['MTAP']	Reactome Pathways	0.328662	downregulated
Circadian Clock Homo sapiens R-HSA-400253	1.27981	0.967336	0.654966	0.469614	['NRIP1', 'SIRT1']	Reactome Pathways	0.328259	downregulated
Factors involved in megakaryocyte development and platelet production Homo sapiens R-HSA-983231	1.1398	0.859213	0.655131	0.470563	['JMJD1C', 'KIF11', 'KIF20B', 'KIF15']	Reactome Pathways	0.327382	downregulated
Hedgehog ligand biogenesis Homo sapiens R-HSA-5358346	1.2591	0.929865	0.664065	0.477823	['PSMD5', 'PSME4']	Reactome Pathways	0.320733	downregulated
Downstream signal transduction Homo sapiens R-HSA-186763	1.05828	0.772701	0.666987	0.481837	['GRIN2A', 'PIK3CA', 'PSMD5', 'PSME4', 'RASA2', 'FRS2', 'IQGAP1', 'FGF2', 'FGF23']	Reactome Pathways	0.3171	downregulated
PTK6 Regulates RHO GTPases, RAS GTPase and MAP kinases Homo sapiens R-HSA-8849471	1.56112	1.13782	0.666987	0.482465	['RASA2']	Reactome Pathways	0.316534	downregulated
ZBP1(DAI) mediated induction of type I IFNs Homo sapiens R-HSA-1606322	1.56112	1.13782	0.666987	0.482465	['TBK1']	Reactome Pathways	0.316534	downregulated
ER-Phagosome pathway Homo sapiens R-HSA-1236974	1.23905	0.89415	0.670634	0.485954	['PSMD5', 'PSME4']	Reactome Pathways	0.313405	downregulated
Beta-catenin independent WNT signaling Homo sapiens R-HSA-3858494	1.11521	0.802741	0.670686	0.486843	['PPP3R1', 'SMURF2', 'PSMD5', 'PSME4']	Reactome Pathways	0.312611	downregulated
DAP12 signaling Homo sapiens R-HSA-2424491	1.04864	0.743074	0.670776	0.492328	['GRIN2A', 'PIK3CA', 'PSMD5', 'PSME4', 'RASA2', 'FRS2', 'IQGAP1', 'FGF2', 'FGF23']	Reactome Pathways	0.307745	downregulated
APC/C:Cdc20 mediated degradation of Securin Homo sapiens R-HSA-174154	1.21963	0.860091	0.670776	0.494006	['PSMD5', 'PSME4']	Reactome Pathways	0.306268	downregulated
Activation of NF-kappaB in B cells Homo sapiens R-HSA-1169091	1.21963	0.860091	0.670776	0.494006	['PSMD5', 'PSME4']	Reactome Pathways	0.306268	downregulated
Triglyceride Biosynthesis Homo sapiens R-HSA-75109	1.21963	0.860091	0.670776	0.494006	['ELOVL6', 'LCLAT1']	Reactome Pathways	0.306268	downregulated
RNA Pol II CTD phosphorylation and interaction with CE Homo sapiens R-HSA-167160	1.501	1.05423	0.670776	0.495421	['RNMT']	Reactome Pathways	0.305026	downregulated
CREB phosphorylation through the activation of Ras Homo sapiens R-HSA-442742	1.501	1.05423	0.670776	0.495421	['GRIN2A']	Reactome Pathways	0.305026	downregulated
Platelet calcium homeostasis Homo sapiens R-HSA-418360	1.501	1.05423	0.670776	0.495421	['ATP2A2']	Reactome Pathways	0.305026	downregulated
RNA Polymerase III Transcription Initiation From Type 2 Promoter Homo sapiens R-HSA-76066	1.501	1.05423	0.670776	0.495421	['BDP1']	Reactome Pathways	0.305026	downregulated
RNA Pol II CTD phosphorylation and interaction with CE Homo sapiens R-HSA-77075	1.501	1.05423	0.670776	0.495421	['RNMT']	Reactome Pathways	0.305026	downregulated
Prefoldin mediated transfer of substrate to CCT/TriC Homo sapiens R-HSA-389957	1.501	1.05423	0.670776	0.495421	['TUBA4A']	Reactome Pathways	0.305026	downregulated
RNA Polymerase III Transcription Initiation From Type 3 Promoter Homo sapiens R-HSA-76071	1.44534	0.97874	0.682019	0.508052	['BDP1']	Reactome Pathways	0.294092	downregulated
Synthesis of PA Homo sapiens R-HSA-1483166	1.44534	0.97874	0.682019	0.508052	['LCLAT1']	Reactome Pathways	0.294092	downregulated
RNA Polymerase III Transcription Initiation From Type 1 Promoter Homo sapiens R-HSA-76061	1.44534	0.97874	0.682019	0.508052	['BDP1']	Reactome Pathways	0.294092	downregulated
Energy dependent regulation of mTOR by LKB1-AMPK Homo sapiens R-HSA-380972	1.44534	0.97874	0.682019	0.508052	['CAB39']	Reactome Pathways	0.294092	downregulated
The role of Nef in HIV-1 replication and disease pathogenesis Homo sapiens R-HSA-164952	1.44534	0.97874	0.682019	0.508052	['PAK2']	Reactome Pathways	0.294092	downregulated
Cyclin E associated events during G1/S transition Homo sapiens R-HSA-69202	1.18255	0.796569	0.683292	0.509868	['CCNE2', 'PSMD5']	Reactome Pathways	0.292542	downregulated
Cyclin A:Cdk2-associated events at S phase entry Homo sapiens R-HSA-69656	1.16484	0.766937	0.691484	0.517676	['CCNE2', 'PSMD5']	Reactome Pathways	0.285942	downregulated
Signaling by Interleukins Homo sapiens R-HSA-449147	1.02137	0.669686	0.691484	0.519092	['IL1A', 'GRIN2A', 'PIK3CA', 'PSMD5', 'PSME4', 'RASA2', 'FRS2', 'IQGAP1', 'FGF2', 'FGF23']	Reactome Pathways	0.284756	downregulated
mRNA Capping Homo sapiens R-HSA-72086	1.39364	0.910355	0.691484	0.520368	['RNMT']	Reactome Pathways	0.283689	downregulated
YAP1- and WWTR1 (TAZ)-stimulated gene expression Homo sapiens R-HSA-2032785	1.39364	0.910355	0.691484	0.520368	['HIPK2']	Reactome Pathways	0.283689	downregulated
PIWI-interacting RNA (piRNA) biogenesis Homo sapiens R-HSA-5601884	1.39364	0.910355	0.691484	0.520368	['MYBL1']	Reactome Pathways	0.283689	downregulated
Signaling by the B Cell Receptor (BCR) Homo sapiens R-HSA-983705	1.03121	0.657957	0.700876	0.528325	['PIK3CA', 'PSMD5', 'PSME4', 'FRS2', 'FGF2', 'FGF23']	Reactome Pathways	0.277098	downregulated
MAPK targets/ Nuclear events mediated by MAP kinases Homo sapiens R-HSA-450282	1.34552	0.848222	0.702402	0.532376	['ATF1']	Reactome Pathways	0.273781	downregulated
RNA Polymerase I Promoter Escape Homo sapiens R-HSA-73772	1.34552	0.848222	0.702402	0.532376	['TAF1B']	Reactome Pathways	0.273781	downregulated
Cdc20:Phospho-APC/C mediated degradation of Cyclin A Homo sapiens R-HSA-174184	1.13096	0.71155	0.702402	0.533041	['PSMD5', 'PSME4']	Reactome Pathways	0.273239	downregulated
APC/C:Cdh1 mediated degradation of Cdc20 and other APC/C:Cdh1 targeted proteins in late mitosis/early G1 Homo sapiens R-HSA-174178	1.13096	0.71155	0.702402	0.533041	['PSMD5', 'PSME4']	Reactome Pathways	0.273239	downregulated
APC:Cdc20 mediated degradation of cell cycle proteins prior to satisfation of the cell cycle checkpoint Homo sapiens R-HSA-179419	1.11474	0.685657	0.710515	0.540598	['PSMD5', 'PSME4']	Reactome Pathways	0.267126	downregulated
DAP12 interactions Homo sapiens R-HSA-2172127	1.00291	0.610885	0.710515	0.543833	['GRIN2A', 'PIK3CA', 'PSMD5', 'PSME4', 'RASA2', 'FRS2', 'IQGAP1', 'FGF2', 'FGF23']	Reactome Pathways	0.264534	downregulated
Disassembly of the destruction complex and recruitment of AXIN to the membrane Homo sapiens R-HSA-4641262	1.3006	0.791612	0.710515	0.544084	['APC']	Reactome Pathways	0.264334	downregulated
NOD1/2 Signaling Pathway Homo sapiens R-HSA-168638	1.3006	0.791612	0.710515	0.544084	['CASP2']	Reactome Pathways	0.264334	downregulated
Inwardly rectifying K+ channels Homo sapiens R-HSA-1296065	1.3006	0.791612	0.710515	0.544084	['ABCC9']	Reactome Pathways	0.264334	downregulated
Muscle contraction Homo sapiens R-HSA-397014	1.02115	0.620545	0.710515	0.544608	['TPM4', 'TPM1', 'ATP2A2', 'ABCC9', 'HIPK2']	Reactome Pathways	0.263916	downregulated
Signaling by FGFR2 Homo sapiens R-HSA-5654738	0.997107	0.5951	0.716422	0.550556	['GRIN2A', 'PIK3CA', 'PSMD5', 'PSME4', 'RASA2', 'FRS2', 'IQGAP1', 'FGF2', 'FGF23']	Reactome Pathways	0.259199	downregulated
APC/C:Cdc20 mediated degradation of mitotic proteins Homo sapiens R-HSA-176409	1.08367	0.637163	0.716422	0.555455	['PSMD5', 'PSME4']	Reactome Pathways	0.255351	downregulated
DNA methylation Homo sapiens R-HSA-5334118	1.25858	0.739904	0.716422	0.5555	['UHRF1']	Reactome Pathways	0.255316	downregulated
RNA Polymerase I Transcription Termination Homo sapiens R-HSA-73863	1.25858	0.739904	0.716422	0.5555	['TAF1B']	Reactome Pathways	0.255316	downregulated
Signaling by NOTCH2 Homo sapiens R-HSA-1980145	1.25858	0.739904	0.716422	0.5555	['MAMLD1']	Reactome Pathways	0.255316	downregulated
TRAF6 mediated IRF7 activation Homo sapiens R-HSA-933541	1.25858	0.739904	0.716422	0.5555	['TBK1']	Reactome Pathways	0.255316	downregulated
Cooperation of Prefoldin and TriC/CCT in actin and tubulin folding Homo sapiens R-HSA-389958	1.25858	0.739904	0.716422	0.5555	['TUBA4A']	Reactome Pathways	0.255316	downregulated
RNA Polymerase I, RNA Polymerase III, and Mitochondrial Transcription Homo sapiens R-HSA-504046	1.03561	0.605528	0.717473	0.55727	['TAF1B', 'TFAM', 'BDP1']	Reactome Pathways	0.253934	downregulated
TCF dependent signaling in response to WNT Homo sapiens R-HSA-201681	1.00521	0.58619	0.717473	0.558136	['SMURF2', 'APC', 'PSMD5', 'PSME4', 'LEO1']	Reactome Pathways	0.25326	downregulated
Activation of APC/C and APC/C:Cdc20 mediated degradation of mitotic proteins Homo sapiens R-HSA-176814	1.06877	0.614448	0.722232	0.562754	['PSMD5', 'PSME4']	Reactome Pathways	0.249681	downregulated
Sphingolipid de novo biosynthesis Homo sapiens R-HSA-1660661	1.21919	0.692558	0.724385	0.56663	['VAPB']	Reactome Pathways	0.2467	downregulated
Cargo concentration in the ER Homo sapiens R-HSA-5694530	1.21919	0.692558	0.724385	0.56663	['SEC22B']	Reactome Pathways	0.2467	downregulated
Signaling by FGFR Homo sapiens R-HSA-190236	0.982885	0.557357	0.724385	0.567189	['GRIN2A', 'PIK3CA', 'PSMD5', 'PSME4', 'RASA2', 'FRS2', 'IQGAP1', 'FGF2', 'FGF23']	Reactome Pathways	0.246272	downregulated
Negative epigenetic regulation of rRNA expression Homo sapiens R-HSA-5250941	1.05427	0.592685	0.726755	0.569968	['TAF1B', 'SIRT1']	Reactome Pathways	0.24415	downregulated
Cellular Senescence Homo sapiens R-HSA-2559583	0.993579	0.550327	0.731601	0.574714	['IL1A', 'TFDP1', 'CCNE2', 'ETS1']	Reactome Pathways	0.240548	downregulated
Negative regulators of RIG-I/MDA5 signaling Homo sapiens R-HSA-936440	1.18218	0.64911	0.731601	0.577482	['TBK1']	Reactome Pathways	0.238461	downregulated
Signaling by WNT in cancer Homo sapiens R-HSA-4791275	1.18218	0.64911	0.731601	0.577482	['APC']	Reactome Pathways	0.238461	downregulated
Purine metabolism Homo sapiens R-HSA-73847	1.18218	0.64911	0.731601	0.577482	['DCK']	Reactome Pathways	0.238461	downregulated
Role of LAT2/NTAL/LAB on calcium mobilization Homo sapiens R-HSA-2730905	0.98724	0.538429	0.731658	0.579616	['PIK3CA', 'FRS2', 'FGF2', 'FGF23']	Reactome Pathways	0.236859	downregulated
Transport to the Golgi and subsequent modification Homo sapiens R-HSA-948021	0.98724	0.538429	0.731658	0.579616	['TRAPPC6B', 'PPP6R3', 'SEC22B', 'SEC22A']	Reactome Pathways	0.236859	downregulated
Fcgamma receptor (FCGR) dependent phagocytosis Homo sapiens R-HSA-2029480	1	0.544188	0.731658	0.580313	['NCKAP1', 'PAK1', 'PIK3CA']	Reactome Pathways	0.236338	downregulated
Regulation of TP53 Degradation Homo sapiens R-HSA-6804757	1.14735	0.609154	0.739065	0.588063	['USP7']	Reactome Pathways	0.230576	downregulated
Post NMDA receptor activation events Homo sapiens R-HSA-438064	1.14735	0.609154	0.739065	0.588063	['GRIN2A']	Reactome Pathways	0.230576	downregulated
Signaling by NOTCH Homo sapiens R-HSA-157118	0.983092	0.516138	0.742259	0.591546	['TFDP1', 'ATP2A2', 'MAMLD1']	Reactome Pathways	0.228011	downregulated
Regulation of TP53 Expression and Degradation Homo sapiens R-HSA-6806003	1.11451	0.572337	0.746729	0.59838	['USP7']	Reactome Pathways	0.223023	downregulated
RNA Polymerase III Transcription Initiation Homo sapiens R-HSA-76046	1.11451	0.572337	0.746729	0.59838	['BDP1']	Reactome Pathways	0.223023	downregulated
RHO GTPases Activate WASPs and WAVEs Homo sapiens R-HSA-5663213	1.11451	0.572337	0.746729	0.59838	['NCKAP1']	Reactome Pathways	0.223023	downregulated
Major pathway of rRNA processing in the nucleolus Homo sapiens R-HSA-6791226	0.962664	0.493521	0.746729	0.598899	['UTP15', 'NOP58', 'EXOSC8', 'WDR12']	Reactome Pathways	0.222646	downregulated
Membrane Trafficking Homo sapiens R-HSA-199991	0.950224	0.474418	0.755601	0.606974	['GOLGA4', 'C2CD5', 'TRAPPC6B', 'PPP6R3', 'GCC2', 'KIF11', 'SEC22B', 'KIF20B', 'SEC22A', 'KIF15']	Reactome Pathways	0.21683	downregulated
Antigen processing-Cross presentation Homo sapiens R-HSA-1236975	0.9749	0.479611	0.759944	0.611427	['PSMD5', 'PSME4']	Reactome Pathways	0.213655	downregulated
DNA Damage Recognition in GG-NER Homo sapiens R-HSA-5696394	1.05416	0.506915	0.766002	0.618245	['PARP2']	Reactome Pathways	0.208839	downregulated
MAP2K and MAPK activation Homo sapiens R-HSA-5674135	1.05416	0.506915	0.766002	0.618245	['IQGAP1']	Reactome Pathways	0.208839	downregulated
mTOR signalling Homo sapiens R-HSA-165159	1.02637	0.477797	0.775411	0.627807	['CAB39']	Reactome Pathways	0.202174	downregulated
Activation of NMDA receptor upon glutamate binding and postsynaptic events Homo sapiens R-HSA-442755	1.02637	0.477797	0.775411	0.627807	['GRIN2A']	Reactome Pathways	0.202174	downregulated
PRC2 methylates histones and DNA Homo sapiens R-HSA-212300	1	0.450781	0.783243	0.63713	['JARID2']	Reactome Pathways	0.195772	downregulated
Transcriptional activation of mitochondrial biogenesis Homo sapiens R-HSA-2151201	1	0.450781	0.783243	0.63713	['TFAM']	Reactome Pathways	0.195772	downregulated
PKB-mediated events Homo sapiens R-HSA-109703	1	0.450781	0.783243	0.63713	['CAB39']	Reactome Pathways	0.195772	downregulated
RNA Polymerase III Abortive And Retractive Initiation Homo sapiens R-HSA-749476	0.97495	0.425678	0.791946	0.64622	['BDP1']	Reactome Pathways	0.18962	downregulated
RNA Polymerase III Transcription Homo sapiens R-HSA-74158	0.97495	0.425678	0.791946	0.64622	['BDP1']	Reactome Pathways	0.18962	downregulated
Diseases of glycosylation Homo sapiens R-HSA-3781865	0.906603	0.390873	0.792663	0.649768	['THBS1', 'THSD4']	Reactome Pathways	0.187242	downregulated
Deactivation of the beta-catenin transactivating complex Homo sapiens R-HSA-3769402	0.951122	0.402318	0.792663	0.655083	['APC']	Reactome Pathways	0.183704	downregulated
Signaling by Retinoic Acid Homo sapiens R-HSA-5362517	0.951122	0.402318	0.792663	0.655083	['DHRS9']	Reactome Pathways	0.183704	downregulated
Fatty Acyl-CoA Biosynthesis Homo sapiens R-HSA-75105	0.951122	0.402318	0.792663	0.655083	['ELOVL6']	Reactome Pathways	0.183704	downregulated
BMAL1:CLOCK,NPAS2 activates circadian gene expression Homo sapiens R-HSA-1368108	0.951122	0.402318	0.792663	0.655083	['NRIP1']	Reactome Pathways	0.183704	downregulated
Transcriptional regulation of pluripotent stem cells Homo sapiens R-HSA-452723	0.951122	0.402318	0.792663	0.655083	['FGF2']	Reactome Pathways	0.183704	downregulated
Glucagon-like Peptide-1 (GLP1) regulates insulin secretion Homo sapiens R-HSA-381676	0.951122	0.402318	0.792663	0.655083	['IQGAP1']	Reactome Pathways	0.183704	downregulated
Activation of anterior HOX genes in hindbrain development during early embryogenesis Homo sapiens R-HSA-5617472	0.896136	0.378	0.792663	0.655858	['PAXIP1', 'KMT2C']	Reactome Pathways	0.18319	downregulated
Activation of HOX genes during differentiation Homo sapiens R-HSA-5619507	0.896136	0.378	0.792663	0.655858	['PAXIP1', 'KMT2C']	Reactome Pathways	0.18319	downregulated
Cardiac conduction Homo sapiens R-HSA-5576891	0.885678	0.368409	0.796091	0.659704	['ATP2A2', 'ABCC9', 'HIPK2']	Reactome Pathways	0.180651	downregulated
rRNA processing Homo sapiens R-HSA-72312	0.885447	0.365178	0.797693	0.662045	['UTP15', 'NOP58', 'EXOSC8', 'WDR12']	Reactome Pathways	0.179112	downregulated
Vasopressin regulates renal water homeostasis via Aquaporins Homo sapiens R-HSA-432040	0.928428	0.380553	0.798321	0.663724	['RAB11FIP2']	Reactome Pathways	0.178013	downregulated
Signaling by Hedgehog Homo sapiens R-HSA-5358351	0.878973	0.359133	0.798321	0.664592	['SMURF2', 'PSMD5', 'PSME4']	Reactome Pathways	0.177445	downregulated
Interleukin-1 signaling Homo sapiens R-HSA-446652	0.90679	0.360246	0.804944	0.672149	['IL1A']	Reactome Pathways	0.172535	downregulated
Inositol phosphate metabolism Homo sapiens R-HSA-1483249	0.90679	0.360246	0.804944	0.672149	['PPIP5K2']	Reactome Pathways	0.172535	downregulated
Signaling by ERBB2 Homo sapiens R-HSA-1227986	0.886136	0.341276	0.813545	0.680363	['PIK3CA']	Reactome Pathways	0.167259	downregulated
Developmental Biology Homo sapiens R-HSA-1266738	0.910853	0.347749	0.815034	0.682643	['PAXIP1', 'SMAD3', 'KMT2C', 'SEMA3A', 'FRS2', 'IQGAP1', 'RGMB', 'FGF2', 'TIAM1', 'GRIN2A', 'PAK1', 'ABLIM3', 'PSMD5', 'PSME4', 'RASA2', 'SRGAP1', 'PAK2', 'FGF23']	Reactome Pathways	0.165807	downregulated
TNFR2 non-canonical NF-kB pathway Homo sapiens R-HSA-5668541	0.838062	0.310207	0.823325	0.690632	['PSMD5', 'PSME4']	Reactome Pathways	0.160753	downregulated
RNA Polymerase I Transcription Initiation Homo sapiens R-HSA-73762	0.847521	0.306926	0.82619	0.696181	['TAF1B']	Reactome Pathways	0.157278	downregulated
Nucleotide-binding domain, leucine rich repeat containing receptor (NLR) signaling pathways Homo sapiens R-HSA-168643	0.847521	0.306926	0.82619	0.696181	['CASP2']	Reactome Pathways	0.157278	downregulated
NOTCH1 Intracellular Domain Regulates Transcription Homo sapiens R-HSA-2122947	0.847521	0.306926	0.82619	0.696181	['MAMLD1']	Reactome Pathways	0.157278	downregulated
TRIF-mediated TLR3/TLR4 signaling Homo sapiens R-HSA-937061	0.820334	0.290763	0.826512	0.701563	['ATF1', 'TBK1']	Reactome Pathways	0.153933	downregulated
MyD88-independent TLR3/TLR4 cascade Homo sapiens R-HSA-166166	0.820334	0.290763	0.826512	0.701563	['ATF1', 'TBK1']	Reactome Pathways	0.153933	downregulated
Toll Like Receptor 3 (TLR3) Cascade Homo sapiens R-HSA-168164	0.820334	0.290763	0.826512	0.701563	['ATF1', 'TBK1']	Reactome Pathways	0.153933	downregulated
Regulation of actin dynamics for phagocytic cup formation Homo sapiens R-HSA-2029482	0.820334	0.290763	0.826512	0.701563	['NCKAP1', 'PAK1']	Reactome Pathways	0.153933	downregulated
EPH-ephrin mediated repulsion of cells Homo sapiens R-HSA-3928665	0.829446	0.291359	0.826512	0.703794	['TIAM1']	Reactome Pathways	0.152554	downregulated
G beta:gamma signalling through PI3Kgamma Homo sapiens R-HSA-392451	0.829446	0.291359	0.826512	0.703794	['PIK3CA']	Reactome Pathways	0.152554	downregulated
Pyruvate metabolism and Citric Acid (TCA) cycle Homo sapiens R-HSA-71406	0.829446	0.291359	0.826512	0.703794	['SUCLA2']	Reactome Pathways	0.152554	downregulated
G alpha (q) signalling events Homo sapiens R-HSA-416476	0.832888	0.289142	0.827701	0.706695	['UTS2B', 'EDN1', 'PIK3CA', 'LPAR1']	Reactome Pathways	0.150768	downregulated
Metabolism of water-soluble vitamins and cofactors Homo sapiens R-HSA-196849	0.811747	0.281559	0.827701	0.706907	['MOCS2', 'SLC25A32']	Reactome Pathways	0.150638	downregulated
Mitochondrial biogenesis Homo sapiens R-HSA-1592230	0.812124	0.276754	0.831394	0.711217	['TFAM']	Reactome Pathways	0.147998	downregulated
Hedgehog 'off' state Homo sapiens R-HSA-5610787	0.803337	0.272682	0.831394	0.712171	['PSMD5', 'PSME4']	Reactome Pathways	0.147416	downregulated
Formation of the ternary complex, and subsequently, the 43S complex Homo sapiens R-HSA-72695	0.795509	0.263038	0.837488	0.718454	['EIF2S3']	Reactome Pathways	0.143601	downregulated
Cell surface interactions at the vascular wall Homo sapiens R-HSA-202733	0.787027	0.255855	0.840916	0.722462	['THBD', 'PIK3CA']	Reactome Pathways	0.141185	downregulated
G-protein beta:gamma signalling Homo sapiens R-HSA-397795	0.779559	0.250145	0.841977	0.72551	['PIK3CA']	Reactome Pathways	0.139356	downregulated
Aquaporin-mediated transport Homo sapiens R-HSA-445717	0.779559	0.250145	0.841977	0.72551	['RAB11FIP2']	Reactome Pathways	0.139356	downregulated
Glycerophospholipid biosynthesis Homo sapiens R-HSA-1483206	0.779116	0.24788	0.843033	0.72749	['ABHD3', 'LCLAT1']	Reactome Pathways	0.138173	downregulated
MHC class II antigen presentation Homo sapiens R-HSA-2132295	0.771363	0.240181	0.847523	0.732441	['KIF11', 'KIF15']	Reactome Pathways	0.135227	downregulated
XBP1(S) activates chaperone genes Homo sapiens R-HSA-381038	0.749499	0.226592	0.851475	0.739098	['SULT1A3']	Reactome Pathways	0.131298	downregulated
Formation of TC-NER Pre-Incision Complex Homo sapiens R-HSA-6781823	0.749499	0.226592	0.851475	0.739098	['USP7']	Reactome Pathways	0.131298	downregulated
GPVI-mediated activation cascade Homo sapiens R-HSA-114604	0.749499	0.226592	0.851475	0.739098	['PIK3CA']	Reactome Pathways	0.131298	downregulated
Platelet degranulation Homo sapiens R-HSA-114608	0.756307	0.225571	0.853701	0.742113	['THBS1', 'TUBA4A']	Reactome Pathways	0.12953	downregulated
Signaling by Wnt Homo sapiens R-HSA-195721	0.807377	0.232234	0.860068	0.750032	['PPP3R1', 'SMURF2', 'APC', 'PSMD5', 'PSME4', 'LEO1']	Reactome Pathways	0.12492	downregulated
HATs acetylate histones Homo sapiens R-HSA-3214847	0.741824	0.211942	0.860068	0.751486	['ZZZ3', 'MSL3']	Reactome Pathways	0.124079	downregulated
IRE1alpha activates chaperones Homo sapiens R-HSA-381070	0.721666	0.205675	0.860068	0.752014	['SULT1A3']	Reactome Pathways	0.123774	downregulated
Ion transport by P-type ATPases Homo sapiens R-HSA-936837	0.721666	0.205675	0.860068	0.752014	['ATP2A2']	Reactome Pathways	0.123774	downregulated
Signal Transduction Homo sapiens R-HSA-162582	0.913288	0.253829	0.861164	0.757351	['ATF1', 'ARHGAP11A', 'NCKAP1', 'AHCTF1', 'ERCC6L', 'NUP107', 'ATP2A2', 'FGF2', 'PSMD5', 'NUF2', 'CASP2', 'KNTC1', 'SPDL1', 'EDN1', 'ARAP3', 'FRS2', 'UCHL5', 'TGFBR2', 'TIAM1', 'UTS2B', 'CLIP1', 'DEPDC7', 'ZFYVE16', 'TFDP1', 'RBL1', 'PIK3CA', 'PSME4', 'CDC42EP3', 'RASA2', 'CAB39', 'LPAR1', 'ARHGAP18', 'IQGAP1', 'THBS1', 'SKA1', 'STK3', 'PPP3R1', 'GRIN2A', 'PAK1', 'PDGFC', 'LEO1', 'ECT2', 'SRGAP1'…	Reactome Pathways	0.120703	downregulated
Ribosomal scanning and start codon recognition Homo sapiens R-HSA-72702	0.69582	0.18704	0.861164	0.764292	['EIF2S3']	Reactome Pathways	0.116741	downregulated
Translation initiation complex formation Homo sapiens R-HSA-72649	0.69582	0.18704	0.861164	0.764292	['EIF2S3']	Reactome Pathways	0.116741	downregulated
Constitutive Signaling by NOTCH1 PEST Domain Mutants Homo sapiens R-HSA-2644606	0.69582	0.18704	0.861164	0.764292	['MAMLD1']	Reactome Pathways	0.116741	downregulated
Signaling by NOTCH1 in Cancer Homo sapiens R-HSA-2644603	0.69582	0.18704	0.861164	0.764292	['MAMLD1']	Reactome Pathways	0.116741	downregulated
Signaling by NOTCH1 PEST Domain Mutants in Cancer Homo sapiens R-HSA-2644602	0.69582	0.18704	0.861164	0.764292	['MAMLD1']	Reactome Pathways	0.116741	downregulated
Signaling by NOTCH1 HD+PEST Domain Mutants in Cancer Homo sapiens R-HSA-2894858	0.69582	0.18704	0.861164	0.764292	['MAMLD1']	Reactome Pathways	0.116741	downregulated
RNA Polymerase I Chain Elongation Homo sapiens R-HSA-73777	0.69582	0.18704	0.861164	0.764292	['TAF1B']	Reactome Pathways	0.116741	downregulated
Constitutive Signaling by NOTCH1 HD+PEST Domain Mutants Homo sapiens R-HSA-2894862	0.69582	0.18704	0.861164	0.764292	['MAMLD1']	Reactome Pathways	0.116741	downregulated
Response to elevated platelet cytosolic Ca2+ Homo sapiens R-HSA-76005	0.721107	0.193176	0.861164	0.764993	['THBS1', 'TUBA4A']	Reactome Pathways	0.116342	downregulated
O-linked glycosylation Homo sapiens R-HSA-5173105	0.721107	0.193176	0.861164	0.764993	['THBS1', 'THSD4']	Reactome Pathways	0.116342	downregulated
FCERI mediated NF-kB activation Homo sapiens R-HSA-2871837	0.714454	0.187334	0.863327	0.769352	['PSMD5', 'PSME4']	Reactome Pathways	0.113875	downregulated
Formation of the beta-catenin:TCF transactivating complex Homo sapiens R-HSA-201722	0.683578	0.178484	0.863327	0.770201	['LEO1']	Reactome Pathways	0.113396	downregulated
Activation of the mRNA upon binding of the cap-binding complex and eIFs, and subsequent binding to 43S Homo sapiens R-HSA-72662	0.683578	0.178484	0.863327	0.770201	['EIF2S3']	Reactome Pathways	0.113396	downregulated
Activated TLR4 signalling Homo sapiens R-HSA-166054	0.707923	0.181687	0.865008	0.773641	['ATF1', 'TBK1']	Reactome Pathways	0.111461	downregulated
DNA Damage/Telomere Stress Induced Senescence Homo sapiens R-HSA-2559586	0.671757	0.170392	0.865008	0.775963	['CCNE2']	Reactome Pathways	0.110159	downregulated
PPARA activates gene expression Homo sapiens R-HSA-1989781	0.701509	0.176226	0.865008	0.77786	['NFYB', 'RGL1']	Reactome Pathways	0.109099	downregulated
Asparagine N-linked glycosylation Homo sapiens R-HSA-446203	0.76537	0.191284	0.865008	0.77886	['TRAPPC6B', 'PPP6R3', 'PGM3', 'SEC22B', 'SEC22A']	Reactome Pathways	0.108541	downregulated
Role of phospholipids in phagocytosis Homo sapiens R-HSA-2029485	0.660338	0.162732	0.865008	0.78158	['PIK3CA']	Reactome Pathways	0.107026	downregulated
Translocation of GLUT4 to the plasma membrane Homo sapiens R-HSA-1445148	0.660338	0.162732	0.865008	0.78158	['C2CD5']	Reactome Pathways	0.107026	downregulated
RHO GTPases activate PKNs Homo sapiens R-HSA-5625740	0.660338	0.162732	0.865008	0.78158	['PKN2']	Reactome Pathways	0.107026	downregulated
HDACs deacetylate histones Homo sapiens R-HSA-3214815	0.660338	0.162732	0.865008	0.78158	['ARID4A']	Reactome Pathways	0.107026	downregulated
MAP kinase activation in TLR cascade Homo sapiens R-HSA-450294	0.660338	0.162732	0.865008	0.78158	['ATF1']	Reactome Pathways	0.107026	downregulated
Ca2+ pathway Homo sapiens R-HSA-4086398	0.649299	0.155477	0.869847	0.787057	['PPP3R1']	Reactome Pathways	0.103994	downregulated
Vesicle-mediated transport Homo sapiens R-HSA-5653656	0.805233	0.190305	0.870774	0.789516	['GOLGA4', 'C2CD5', 'TRAPPC6B', 'PPP6R3', 'GCC2', 'KIF11', 'SEC22B', 'KIF20B', 'SEC22A', 'KIF15']	Reactome Pathways	0.102639	downregulated
Regulation of lipid metabolism by Peroxisome proliferator-activated receptor alpha (PPARalpha) Homo sapiens R-HSA-400206	0.682942	0.160894	0.870774	0.790105	['NFYB', 'RGL1']	Reactome Pathways	0.102315	downregulated
Autodegradation of Cdh1 by Cdh1:APC/C Homo sapiens R-HSA-174084	0.638622	0.148603	0.87208	0.792397	['PSMD5']	Reactome Pathways	0.101057	downregulated
Fatty acid, triacylglycerol, and ketone body metabolism Homo sapiens R-HSA-535734	0.730236	0.167725	0.873486	0.794783	['NFYB', 'ELOVL6', 'RGL1', 'LCLAT1']	Reactome Pathways	0.0997513	downregulated
Synthesis of substrates in N-glycan biosythesis Homo sapiens R-HSA-446219	0.628289	0.142084	0.875302	0.797603	['PGM3']	Reactome Pathways	0.0982131	downregulated
Innate Immune System Homo sapiens R-HSA-168249	0.833582	0.187408	0.875302	0.798658	['ATF1', 'NCKAP1', 'NFATC2', 'FRS2', 'IQGAP1', 'FGF2', 'PPP3R1', 'GRIN2A', 'PAK1', 'TBK1', 'PIK3CA', 'PSMD5', 'PSME4', 'RASA2', 'CASP2', 'PAK2', 'FGF23']	Reactome Pathways	0.0976393	downregulated
Cytosolic sensors of pathogen-associated DNA Homo sapiens R-HSA-1834949	0.599198	0.124452	0.888356	0.812453	['TBK1']	Reactome Pathways	0.0902018	downregulated
Toll Like Receptor 4 (TLR4) Cascade Homo sapiens R-HSA-166016	0.648594	0.134416	0.888356	0.812824	['ATF1', 'TBK1']	Reactome Pathways	0.0900037	downregulated
Integrin cell surface interactions Homo sapiens R-HSA-216083	0.590089	0.119153	0.889392	0.817157	['THBS1']	Reactome Pathways	0.0876945	downregulated
Macroautophagy Homo sapiens R-HSA-1632852	0.590089	0.119153	0.889392	0.817157	['ATG10']	Reactome Pathways	0.0876945	downregulated
Signaling by PTK6 Homo sapiens R-HSA-8848021	0.590089	0.119153	0.889392	0.817157	['RASA2']	Reactome Pathways	0.0876945	downregulated
TRAF6 Mediated Induction of proinflammatory cytokines Homo sapiens R-HSA-168180	0.548393	0.0962875	0.910617	0.838969	['ATF1']	Reactome Pathways	0.076254	downregulated
Signaling by NOTCH1 Homo sapiens R-HSA-1980143	0.548393	0.0962875	0.910617	0.838969	['MAMLD1']	Reactome Pathways	0.076254	downregulated
NoRC negatively regulates rRNA expression Homo sapiens R-HSA-427413	0.540748	0.0923474	0.913743	0.843009	['TAF1B']	Reactome Pathways	0.0741676	downregulated
Sphingolipid metabolism Homo sapiens R-HSA-428157	0.533313	0.0885915	0.916752	0.846949	['VAPB']	Reactome Pathways	0.072143	downregulated
RNA Polymerase I Promoter Clearance Homo sapiens R-HSA-73854	0.519038	0.0815927	0.923693	0.854533	['TAF1B']	Reactome Pathways	0.068271	downregulated
Senescence-Associated Secretory Phenotype (SASP) Homo sapiens R-HSA-2559582	0.512182	0.0783316	0.926368	0.858184	['IL1A']	Reactome Pathways	0.0664197	downregulated
Biosynthesis of the N-glycan precursor (dolichol lipid-linked oligosaccharide, LLO) and transfer to a nascent protein Homo sapiens R-HSA-446193	0.505505	0.0752183	0.928938	0.861743	['PGM3']	Reactome Pathways	0.0646223	downregulated
RNA Polymerase I Transcription Homo sapiens R-HSA-73864	0.498998	0.0722449	0.930133	0.865213	['TAF1B']	Reactome Pathways	0.0628771	downregulated
RIG-I/MDA5 mediated induction of IFN-alpha/beta pathways Homo sapiens R-HSA-168928	0.498998	0.0722449	0.930133	0.865213	['TBK1']	Reactome Pathways	0.0628771	downregulated
Toll-Like Receptors Cascades Homo sapiens R-HSA-168898	0.563471	0.0795414	0.931229	0.868348	['ATF1', 'TBK1']	Reactome Pathways	0.0613064	downregulated
Regulation of insulin secretion Homo sapiens R-HSA-422356	0.492656	0.0694041	0.931229	0.868596	['IQGAP1']	Reactome Pathways	0.0611823	downregulated
Opioid Signalling Homo sapiens R-HSA-111885	0.486473	0.0666893	0.933135	0.871894	['PPP3R1']	Reactome Pathways	0.0595363	downregulated
Toll Like Receptor 10 (TLR10) Cascade Homo sapiens R-HSA-168142	0.480442	0.0640939	0.933135	0.87511	['ATF1']	Reactome Pathways	0.0579375	downregulated
Toll Like Receptor 5 (TLR5) Cascade Homo sapiens R-HSA-168176	0.480442	0.0640939	0.933135	0.87511	['ATF1']	Reactome Pathways	0.0579375	downregulated
MyD88 cascade initiated on plasma membrane Homo sapiens R-HSA-975871	0.480442	0.0640939	0.933135	0.87511	['ATF1']	Reactome Pathways	0.0579375	downregulated
TRAF6 mediated induction of NFkB and MAP kinases upon TLR7/8 or 9 activation Homo sapiens R-HSA-975138	0.474559	0.061612	0.934677	0.878245	['ATF1']	Reactome Pathways	0.0563845	downregulated
Mitochondrial translation initiation Homo sapiens R-HSA-5368286	0.468817	0.0592378	0.934677	0.881301	['MRPS35']	Reactome Pathways	0.0548756	downregulated
Mitochondrial translation termination Homo sapiens R-HSA-5419276	0.468817	0.0592378	0.934677	0.881301	['MRPS35']	Reactome Pathways	0.0548756	downregulated
Mitochondrial translation elongation Homo sapiens R-HSA-5389840	0.468817	0.0592378	0.934677	0.881301	['MRPS35']	Reactome Pathways	0.0548756	downregulated
Toll Like Receptor 7/8 (TLR7/8) Cascade Homo sapiens R-HSA-168181	0.463212	0.0569659	0.93532	0.884281	['ATF1']	Reactome Pathways	0.0534096	downregulated
MyD88 dependent cascade initiated on endosome Homo sapiens R-HSA-975155	0.463212	0.0569659	0.93532	0.884281	['ATF1']	Reactome Pathways	0.0534096	downregulated
Hemostasis Homo sapiens R-HSA-109582	0.713834	0.0854238	0.936531	0.887214	['THBD', 'PIK3CA', 'JMJD1C', 'ATP2A2', 'KIF11', 'TFPI', 'KIF20B', 'THBS1', 'TUBA4A', 'KIF15']	Reactome Pathways	0.0519716	downregulated
Metabolism of vitamins and cofactors Homo sapiens R-HSA-196854	0.532376	0.0633559	0.936531	0.887803	['MOCS2', 'SLC25A32']	Reactome Pathways	0.0516836	downregulated
Platelet homeostasis Homo sapiens R-HSA-418346	0.452393	0.0527095	0.937614	0.890019	['ATP2A2']	Reactome Pathways	0.0506008	downregulated
Toll Like Receptor 9 (TLR9) Cascade Homo sapiens R-HSA-168138	0.44717	0.0507156	0.939267	0.89278	['ATF1']	Reactome Pathways	0.0492553	downregulated
Mitochondrial translation Homo sapiens R-HSA-5368287	0.437076	0.0469755	0.94138	0.898098	['MRPS35']	Reactome Pathways	0.0466765	downregulated
Oxidative Stress Induced Senescence Homo sapiens R-HSA-2559580	0.432198	0.0452214	0.94138	0.900657	['TFDP1']	Reactome Pathways	0.0454408	downregulated
Metabolism of lipids and lipoproteins Homo sapiens R-HSA-556833	0.716535	0.0742054	0.94138	0.901621	['PIKFYVE', 'PIK3CA', 'INPP5F', 'ABHD3', 'VAPB', 'NFYB', 'ELOVL6', 'FAR2', 'RGL1', 'LCLAT1', 'MTMR6', 'KPNB1']	Reactome Pathways	0.0449761	downregulated
Toll Like Receptor TLR6:TLR2 Cascade Homo sapiens R-HSA-168188	0.427426	0.0435398	0.94138	0.903151	['ATF1']	Reactome Pathways	0.0442394	downregulated
Toll Like Receptor 2 (TLR2) Cascade Homo sapiens R-HSA-181438	0.427426	0.0435398	0.94138	0.903151	['ATF1']	Reactome Pathways	0.0442394	downregulated
Toll Like Receptor TLR1:TLR2 Cascade Homo sapiens R-HSA-168179	0.427426	0.0435398	0.94138	0.903151	['ATF1']	Reactome Pathways	0.0442394	downregulated
MyD88:Mal cascade initiated on plasma membrane Homo sapiens R-HSA-166058	0.427426	0.0435398	0.94138	0.903151	['ATF1']	Reactome Pathways	0.0442394	downregulated
Interferon gamma signaling Homo sapiens R-HSA-877300	0.422759	0.0419273	0.942668	0.905584	['PIAS1']	Reactome Pathways	0.0430714	downregulated
L1CAM interactions Homo sapiens R-HSA-373760	0.409345	0.0374731	0.948637	0.912521	['PAK1']	Reactome Pathways	0.0397571	downregulated
Visual phototransduction Homo sapiens R-HSA-2187338	0.40506	0.0361066	0.949668	0.914719	['DHRS9']	Reactome Pathways	0.0387125	downregulated
Potassium Channels Homo sapiens R-HSA-1296071	0.396753	0.0335351	0.951554	0.91895	['ABCC9']	Reactome Pathways	0.0367083	downregulated
Transport of inorganic cations/anions and amino acids/oligopeptides Homo sapiens R-HSA-425393	0.396753	0.0335351	0.951554	0.91895	['SLC4A7']	Reactome Pathways	0.0367083	downregulated
Phase II conjugation Homo sapiens R-HSA-156580	0.392725	0.0323254	0.952411	0.920986	['SULT1A3']	Reactome Pathways	0.035747	downregulated
L13a-mediated translational silencing of Ceruloplasmin expression Homo sapiens R-HSA-156827	0.370169	0.0259987	0.961458	0.932175	['EIF2S3']	Reactome Pathways	0.0305026	downregulated
3' -UTR-mediated translational regulation Homo sapiens R-HSA-157279	0.370169	0.0259987	0.961458	0.932175	['EIF2S3']	Reactome Pathways	0.0305026	downregulated
GTP hydrolysis and joining of the 60S ribosomal subunit Homo sapiens R-HSA-72706	0.366658	0.0250822	0.961957	0.93388	['EIF2S3']	Reactome Pathways	0.0297091	downregulated
Integration of energy metabolism Homo sapiens R-HSA-163685	0.356511	0.022537	0.965702	0.938741	['IQGAP1']	Reactome Pathways	0.0274542	downregulated
Eukaryotic Translation Initiation Homo sapiens R-HSA-72613	0.34382	0.0195691	0.969274	0.944673	['EIF2S3']	Reactome Pathways	0.0247186	downregulated
Cap-dependent Translation Initiation Homo sapiens R-HSA-72737	0.34382	0.0195691	0.969274	0.944673	['EIF2S3']	Reactome Pathways	0.0247186	downregulated
Glycosaminoglycan metabolism Homo sapiens R-HSA-1630316	0.323647	0.0153405	0.976246	0.953707	['HAS3']	Reactome Pathways	0.0205851	downregulated
Platelet activation, signaling and aggregation Homo sapiens R-HSA-76002	0.464789	0.0219141	0.976246	0.953946	['PIK3CA', 'THBS1', 'TUBA4A']	Reactome Pathways	0.0204763	downregulated
Peptide ligand-binding receptors Homo sapiens R-HSA-375276	0.406001	0.0183586	0.976864	0.955789	['UTS2B', 'EDN1']	Reactome Pathways	0.019638	downregulated
mRNA Splicing - Major Pathway Homo sapiens R-HSA-72163	0.291817	0.00986482	0.986797	0.96676	['CCAR1']	Reactome Pathways	0.0146813	downregulated
Neurotransmitter Receptor Binding And Downstream Transmission In The Postsynaptic Cell Homo sapiens R-HSA-112314	0.275146	0.00756142	0.990583	0.972893	['GRIN2A']	Reactome Pathways	0.0119351	downregulated
Metabolism Homo sapiens R-HSA-1430728	0.730603	0.0194472	0.990583	0.973733	['NUP205', 'MOCS2', 'NUP107', 'NUP188', 'ABHD3', 'ZDHHC21', 'IQGAP1', 'LCLAT1', 'MTMR6', 'INPP5F', 'PSMD5', 'PPIP5K2', 'TPR', 'HAS3', 'XYLB', 'SULT1A3', 'LYPLA1', 'RRM1', 'RRM2', 'NUP155', 'NFYB', 'ELOVL6', 'DCK', 'MTAP', 'PIKFYVE', 'SLC5A9', 'SUCLA2', 'PIK3CA', 'DDAH1', 'VAPB', 'PSME4', 'SLC25A32', 'NUP54', 'FAR2', 'RGL1', 'KPNB1']	Reactome Pathways	0.0115601	downregulated
mRNA Splicing Homo sapiens R-HSA-72172	0.27127	0.00707935	0.990583	0.97424	['CCAR1']	Reactome Pathways	0.0113338	downregulated
Translation Homo sapiens R-HSA-72766	0.258517	0.00563133	0.993391	0.978452	['EIF2S3']	Reactome Pathways	0.00946033	downregulated
The citric acid (TCA) cycle and respiratory electron transport Homo sapiens R-HSA-1428517	0.255089	0.00527739	0.993391	0.979524	['SUCLA2']	Reactome Pathways	0.00898486	downregulated
Class A/1 (Rhodopsin-like receptors) Homo sapiens R-HSA-373076	0.361796	0.0042719	0.999994	0.988262	['UTS2B', 'EDN1', 'LPAR1']	Reactome Pathways	0.00512793	downregulated
Metabolism of amino acids and derivatives Homo sapiens R-HSA-71291	0.348501	0.00322284	0.999994	0.990795	['MTAP', 'PSMD5', 'PSME4']	Reactome Pathways	0.00401624	downregulated
Biological oxidations Homo sapiens R-HSA-211859	0.19536	0.00123953	0.999994	0.993675	['SULT1A3']	Reactome Pathways	0.00275552	downregulated
Extracellular matrix organization Homo sapiens R-HSA-1474244	0.274679	0.00169275	0.999994	0.993856	['FGF2', 'THBS1']	Reactome Pathways	0.0026764	downregulated
Ion channel transport Homo sapiens R-HSA-983712	0.191452	0.00109631	0.999994	0.99429	['ATP2A2']	Reactome Pathways	0.00248689	downregulated
Transmission across Chemical Synapses Homo sapiens R-HSA-112315	0.184082	0.000858635	0.999994	0.995346	['GRIN2A']	Reactome Pathways	0.00202572	downregulated
Neuronal System Homo sapiens R-HSA-112316	0.257901	0.00105688	0.999994	0.99591	['GRIN2A', 'ABCC9']	Reactome Pathways	0.00177974	downregulated
G alpha (i) signalling events Homo sapiens R-HSA-418594	0.161503	0.000358257	0.999994	0.997784	['LPAR1']	Reactome Pathways	0.000963383	downregulated
GPCR ligand binding Homo sapiens R-HSA-500792	0.259068	0.000225806	0.999994	0.999129	['UTS2B', 'EDN1', 'LPAR1']	Reactome Pathways	0.000378536	downregulated
Signaling by GPCR Homo sapiens R-HSA-372790	0.440976	6.63594e-05	0.999994	0.99985	['EDN1', 'LPAR1', 'FRS2', 'IQGAP1', 'FGF2', 'TIAM1', 'UTS2B', 'PPP3R1', 'GRIN2A', 'PIK3CA', 'PSMD5', 'PSME4', 'RASA2', 'ECT2', 'FGF23']	Reactome Pathways	6.5354e-05	downregulated
GPCR downstream signaling Homo sapiens R-HSA-388396	0.230272	1.27481e-06	0.999994	0.999994	['TIAM1', 'UTS2B', 'EDN1', 'PIK3CA', 'LPAR1', 'ECT2']	Reactome Pathways	2.40429e-06	downregulated
Respiratory electron transport, ATP synthesis by chemiosmotic coupling, and heat production by uncoupling proteins. Homo sapiens R-HSA-163200	5.88412	84.623	0.000234938	5.67757e-07	['NDUFA13', 'NDUFA3', 'NDUFA2', 'NDUFB2', 'NDUFA1', 'ATP5I', 'UQCR10', 'COX5B', 'UQCRH', 'COX6B1', 'UQCRQ', 'ATP5E', 'ATP5D', 'COX14']	Reactome Pathways	6.24584	upregulated
Metabolism Homo sapiens R-HSA-1430728	1.89877	26.7862	0.000234938	7.4702e-07	['SLC25A1', 'NDUFA13', 'NUDT1', 'GPT', 'NADSYN1', 'PLB1', 'SGSH', 'TRMT112', 'STK11', 'AKR7A2', 'ALDH2', 'HYAL2', 'RPL36', 'TK2', 'RPL37', 'CHAC1', 'ACAA1', 'RPL39', 'ACAD10', 'ACADS', 'GAMT', 'DGAT1', 'CHPF2', 'DCXR', 'AKR1A1', 'COX6B1', 'APRT', 'GCHFR', 'SLC25A15', 'RPL37A', 'ALDOC', 'SLC25A11', 'LIPT2', 'PFKFB4', 'GALT', 'NNMT', 'MVK', 'NDUFB2', 'ATP5I', 'UQCR10', 'GLYAT', 'COX5B', 'UQCRH', 'D…	Reactome Pathways	6.12667	upregulated
The citric acid (TCA) cycle and respiratory electron transport Homo sapiens R-HSA-1428517	4.33931	51.444	0.00148874	7.10051e-06	['NDUFA13', 'NDUFA3', 'NDUFA2', 'NDUFB2', 'NDUFA1', 'ATP5I', 'UQCR10', 'COX5B', 'UQCRH', 'COX6B1', 'RXRA', 'UQCRQ', 'ATP5E', 'ATP5D', 'COX14']	Reactome Pathways	5.14871	upregulated
Respiratory electron transport Homo sapiens R-HSA-611105	5.67426	64.27	0.00189459	1.20483e-05	['NDUFA13', 'UQCRQ', 'NDUFA3', 'NDUFA2', 'NDUFB2', 'NDUFA1', 'COX14', 'UQCR10', 'COX5B', 'UQCRH', 'COX6B1']	Reactome Pathways	4.91908	upregulated
Metabolism of carbohydrates Homo sapiens R-HSA-71387	2.72105	22.2383	0.0268014	0.000282259	['SLC25A1', 'PFKFB4', 'GALT', 'CHPF2', 'B3GAT3', 'DCXR', 'AKR1A1', 'SGSH', 'PFKL', 'PC', 'PHKG1', 'CHST12', 'HYAL2', 'GPC1', 'SDC1', 'ALDOC', 'SLC25A11', 'PCK2']	Reactome Pathways	3.54935	upregulated
Eukaryotic Translation Termination Homo sapiens R-HSA-72764	4.56415	36.6811	0.0268014	0.00032335	['TRMT112', 'RPS25', 'RPL41', 'RPL37A', 'RPL36', 'RPS3', 'RPL37', 'FAU', 'RPL39']	Reactome Pathways	3.49033	upregulated
Influenza Infection Homo sapiens R-HSA-168254	3.52732	28.2659	0.0268014	0.000330992	['CPSF4', 'RPS25', 'RPL41', 'RPL37A', 'RPL36', 'RPS3', 'POLR2F', 'RPL37', 'FAU', 'RPL39', 'POLR2J', 'POLR2L']	Reactome Pathways	3.48018	upregulated
Influenza Viral RNA Transcription and Replication Homo sapiens R-HSA-168273	3.72665	29.4033	0.0268014	0.000374472	['RPS25', 'RPL41', 'RPL37A', 'RPL36', 'RPS3', 'POLR2F', 'RPL37', 'FAU', 'RPL39', 'POLR2J', 'POLR2L']	Reactome Pathways	3.42658	upregulated
Eukaryotic Translation Elongation Homo sapiens R-HSA-156842	4.44959	35.0014	0.0268014	0.000383486	['RPS25', 'RPL41', 'EEF1D', 'RPL37A', 'RPL36', 'RPS3', 'RPL37', 'FAU', 'RPL39']	Reactome Pathways	3.41625	upregulated
rRNA processing Homo sapiens R-HSA-72312	3.09028	22.8308	0.0358541	0.000618655	['RPL41', 'DDX49', 'IMP3', 'RPS25', 'TRMT112', 'EXOSC4', 'RPL37A', 'RPL36', 'RPP21', 'RPS3', 'RPL37', 'FAU', 'RPL39']	Reactome Pathways	3.20855	upregulated
Influenza Life Cycle Homo sapiens R-HSA-168255	3.48671	25.7128	0.0358541	0.000627019	['RPS25', 'RPL41', 'RPL37A', 'RPL36', 'RPS3', 'POLR2F', 'RPL37', 'FAU', 'RPL39', 'POLR2J', 'POLR2L']	Reactome Pathways	3.20272	upregulated
BH3-only proteins associate with and inactivate anti-apoptotic BCL-2 members Homo sapiens R-HSA-111453	23.5352	168.065	0.0384692	0.000791945	['BCL2L11', 'BAD', 'BBC3']	Reactome Pathways	3.10131	upregulated
Glucose metabolism Homo sapiens R-HSA-70326	4.44956	31.7569	0.0384692	0.000795071	['SLC25A1', 'PFKFB4', 'PFKL', 'PC', 'PHKG1', 'ALDOC', 'SLC25A11', 'PCK2']	Reactome Pathways	3.09959	upregulated
Major pathway of rRNA processing in the nucleolus Homo sapiens R-HSA-6791226	3.0891	21.3944	0.0441108	0.000982143	['RPS25', 'RPL41', 'DDX49', 'EXOSC4', 'IMP3', 'RPL37A', 'RPL36', 'RPP21', 'RPS3', 'RPL37', 'FAU', 'RPL39']	Reactome Pathways	3.00783	upregulated
Gluconeogenesis Homo sapiens R-HSA-70263	7.28507	49.6084	0.0441108	0.00110314	['SLC25A1', 'PC', 'ALDOC', 'SLC25A11', 'PCK2']	Reactome Pathways	2.95737	upregulated
Viral mRNA Translation Homo sapiens R-HSA-192823	4.15576	27.9764	0.0441108	0.00119218	['RPS25', 'RPL41', 'RPL37A', 'RPL36', 'RPS3', 'RPL37', 'FAU', 'RPL39']	Reactome Pathways	2.92366	upregulated
Peptide chain elongation Homo sapiens R-HSA-156902	4.15576	27.9764	0.0441108	0.00119218	['RPS25', 'RPL41', 'RPL37A', 'RPL36', 'RPS3', 'RPL37', 'FAU', 'RPL39']	Reactome Pathways	2.92366	upregulated
Selenocysteine synthesis Homo sapiens R-HSA-2408557	3.99732	25.9983	0.0523305	0.00149753	['RPS25', 'RPL41', 'RPL37A', 'RPL36', 'RPS3', 'RPL37', 'FAU', 'RPL39']	Reactome Pathways	2.82462	upregulated
Nonsense Mediated Decay (NMD) independent of the Exon Junction Complex (EJC) Homo sapiens R-HSA-975956	3.89822	24.7836	0.0573844	0.00173339	['RPS25', 'RPL41', 'RPL37A', 'RPL36', 'RPS3', 'RPL37', 'FAU', 'RPL39']	Reactome Pathways	2.7611	upregulated
Selenoamino acid metabolism Homo sapiens R-HSA-2408522	3.48592	21.8732	0.0592299	0.0018833	['RPS25', 'RPL41', 'NNMT', 'RPL37A', 'RPL36', 'RPS3', 'RPL37', 'FAU', 'RPL39']	Reactome Pathways	2.72508	upregulated
Abortive elongation of HIV-1 transcript in the absence of Tat Homo sapiens R-HSA-167242	8.26868	50.0793	0.0701658	0.00234258	['CTDP1', 'POLR2F', 'POLR2J', 'POLR2L']	Reactome Pathways	2.63031	upregulated
tRNA modification in the nucleus and cytosol Homo sapiens R-HSA-6782315	5.78313	34.134	0.0765222	0.00273302	['QTRT1', 'TRMT112', 'CTU1', 'LAGE3', 'TRMT61A']	Reactome Pathways	2.56336	upregulated
Formation of a pool of free 40S subunits Homo sapiens R-HSA-72689	3.58684	21.0864	0.0765222	0.00279811	['RPS25', 'RPL41', 'RPL37A', 'RPL36', 'RPS3', 'RPL37', 'FAU', 'RPL39']	Reactome Pathways	2.55314	upregulated
tRNA processing Homo sapiens R-HSA-72306	3.32135	18.0868	0.106705	0.00431524	['QTRT1', 'CPSF4', 'TRMT112', 'CTU1', 'POP7', 'RPP21', 'LAGE3', 'TRMT61A']	Reactome Pathways	2.36499	upregulated
Translation Homo sapiens R-HSA-72766	2.802	14.9925	0.106705	0.0047451	['RPS25', 'TRMT112', 'RPL41', 'EEF1D', 'RPL37A', 'RPL36', 'RPS3', 'RPL37', 'FAU', 'RPL39']	Reactome Pathways	2.32375	upregulated
TP53 Regulates Metabolic Genes Homo sapiens R-HSA-5628897	3.5816	18.9354	0.106705	0.00505761	['PRDX5', 'DDIT4', 'COX14', 'LAMTOR2', 'COX5B', 'LAMTOR4', 'COX6B1']	Reactome Pathways	2.29605	upregulated
Nonsense-Mediated Decay (NMD) Homo sapiens R-HSA-927802	3.21918	16.9725	0.106705	0.00513173	['RPS25', 'RPL41', 'RPL37A', 'RPL36', 'RPS3', 'RPL37', 'FAU', 'RPL39']	Reactome Pathways	2.28974	upregulated
Nonsense Mediated Decay (NMD) enhanced by the Exon Junction Complex (EJC) Homo sapiens R-HSA-975957	3.21918	16.9725	0.106705	0.00513173	['RPS25', 'RPL41', 'RPL37A', 'RPL36', 'RPS3', 'RPL37', 'FAU', 'RPL39']	Reactome Pathways	2.28974	upregulated
L13a-mediated translational silencing of Ceruloplasmin expression Homo sapiens R-HSA-156827	3.21918	16.9725	0.106705	0.00513173	['RPS25', 'RPL41', 'RPL37A', 'RPL36', 'RPS3', 'RPL37', 'FAU', 'RPL39']	Reactome Pathways	2.28974	upregulated
3' -UTR-mediated translational regulation Homo sapiens R-HSA-157279	3.21918	16.9725	0.106705	0.00513173	['RPS25', 'RPL41', 'RPL37A', 'RPL36', 'RPS3', 'RPL37', 'FAU', 'RPL39']	Reactome Pathways	2.28974	upregulated
SRP-dependent cotranslational protein targeting to membrane Homo sapiens R-HSA-1799339	3.1865	16.621	0.106705	0.00542857	['RPS25', 'RPL41', 'RPL37A', 'RPL36', 'RPS3', 'RPL37', 'FAU', 'RPL39']	Reactome Pathways	2.26531	upregulated
GTP hydrolysis and joining of the 60S ribosomal subunit Homo sapiens R-HSA-72706	3.1865	16.621	0.106705	0.00542857	['RPS25', 'RPL41', 'RPL37A', 'RPL36', 'RPS3', 'RPL37', 'FAU', 'RPL39']	Reactome Pathways	2.26531	upregulated
Catabolism of glucuronate to xylulose-5-phosphate Homo sapiens R-HSA-5661270	26.1004	133.823	0.112394	0.00593281	['DCXR', 'AKR1A1']	Reactome Pathways	2.22674	upregulated
Formation of ATP by chemiosmotic coupling Homo sapiens R-HSA-163210	9.04829	45.1269	0.112394	0.0068238	['ATP5E', 'ATP5D', 'ATP5I']	Reactome Pathways	2.16597	upregulated
Infectious disease Homo sapiens R-HSA-5663205	2.03832	10.137	0.112394	0.00692096	['CPSF4', 'RPL41', 'CTDP1', 'MAP2K2', 'VPS37D', 'RPS25', 'SV2A', 'RPL37A', 'RPL36', 'RPS3', 'POLR2F', 'RPL37', 'FAU', 'RPL39', 'POLR2J', 'VPS28', 'POLR2L']	Reactome Pathways	2.15983	upregulated
Transcriptional Regulation by TP53 Homo sapiens R-HSA-3700989	2.03832	10.137	0.112394	0.00692096	['BTG2', 'CTDP1', 'COX5B', 'RABGGTA', 'BBC3', 'COX6B1', 'PRDX5', 'STK11', 'TP53I3', 'DDIT4', 'TMEM219', 'POLR2F', 'LAMTOR2', 'COX14', 'LAMTOR4', 'POLR2J', 'POLR2L']	Reactome Pathways	2.15983	upregulated
Pausing and recovery of Tat-mediated HIV elongation Homo sapiens R-HSA-167238	5.81631	28.7667	0.112394	0.00711269	['CTDP1', 'POLR2F', 'POLR2J', 'POLR2L']	Reactome Pathways	2.14797	upregulated
Tat-mediated HIV elongation arrest and recovery Homo sapiens R-HSA-167243	5.81631	28.7667	0.112394	0.00711269	['CTDP1', 'POLR2F', 'POLR2J', 'POLR2L']	Reactome Pathways	2.14797	upregulated
Complex I biogenesis Homo sapiens R-HSA-6799198	4.46648	21.9229	0.112394	0.007385	['NDUFA13', 'NDUFA3', 'NDUFA2', 'NDUFB2', 'NDUFA1']	Reactome Pathways	2.13165	upregulated
Cap-dependent Translation Initiation Homo sapiens R-HSA-72737	2.975	14.4061	0.112394	0.0078882	['RPS25', 'RPL41', 'RPL37A', 'RPL36', 'RPS3', 'RPL37', 'FAU', 'RPL39']	Reactome Pathways	2.10302	upregulated
Eukaryotic Translation Initiation Homo sapiens R-HSA-72613	2.975	14.4061	0.112394	0.0078882	['RPS25', 'RPL41', 'RPL37A', 'RPL36', 'RPS3', 'RPL37', 'FAU', 'RPL39']	Reactome Pathways	2.10302	upregulated
HIV elongation arrest and recovery Homo sapiens R-HSA-167287	5.60829	27.0988	0.112394	0.0079712	['CTDP1', 'POLR2F', 'POLR2J', 'POLR2L']	Reactome Pathways	2.09848	upregulated
Pausing and recovery of HIV elongation Homo sapiens R-HSA-167290	5.60829	27.0988	0.112394	0.0079712	['CTDP1', 'POLR2F', 'POLR2J', 'POLR2L']	Reactome Pathways	2.09848	upregulated
Elongation arrest and recovery Homo sapiens R-HSA-112387	5.60829	27.0988	0.112394	0.0079712	['CTDP1', 'POLR2F', 'POLR2J', 'POLR2L']	Reactome Pathways	2.09848	upregulated
Chondroitin sulfate/dermatan sulfate metabolism Homo sapiens R-HSA-1793185	4.367	21.063	0.112394	0.00804089	['CHPF2', 'CHST12', 'B3GAT3', 'GPC1', 'SDC1']	Reactome Pathways	2.0947	upregulated
Formation of the Early Elongation Complex Homo sapiens R-HSA-113418	5.41463	25.5693	0.119041	0.00889498	['CTDP1', 'POLR2F', 'POLR2J', 'POLR2L']	Reactome Pathways	2.05085	upregulated
Formation of the HIV-1 Early Elongation Complex Homo sapiens R-HSA-167158	5.41463	25.5693	0.119041	0.00889498	['CTDP1', 'POLR2F', 'POLR2J', 'POLR2L']	Reactome Pathways	2.05085	upregulated
mRNA Splicing - Minor Pathway Homo sapiens R-HSA-72165	4.18074	19.4799	0.12412	0.00947181	['ZMAT5', 'POLR2F', 'SNRNP35', 'POLR2J', 'POLR2L']	Reactome Pathways	2.02357	upregulated
Metabolism of amino acids and derivatives Homo sapiens R-HSA-71291	1.98772	9.04427	0.135638	0.0105664	['GAMT', 'LIPT2', 'RPL41', 'NNMT', 'GPT', 'NMRAL1', 'DDO', 'ALDH4A1', 'RPS25', 'SLC25A15', 'RPL37A', 'RPL36', 'RPS3', 'RPL37', 'FAU', 'RPL39']	Reactome Pathways	1.97607	upregulated
Signaling by FGFR2 IIIa TM Homo sapiens R-HSA-8851708	7.3506	33.0369	0.140529	0.0111708	['POLR2F', 'POLR2J', 'POLR2L']	Reactome Pathways	1.95192	upregulated
Biological oxidations Homo sapiens R-HSA-211859	2.31075	10.272	0.144711	0.0117334	['GSTM4', 'TRMT112', 'AKR7A2', 'RXRA', 'NNMT', 'ALDH2', 'GSS', 'EPHX1', 'AKR1A1', 'CHAC1', 'GLYAT']	Reactome Pathways	1.93058	upregulated
Anchoring fibril formation Homo sapiens R-HSA-2214320	15.6586	69.1885	0.145779	0.0120517	['LAMB3', 'COL7A1']	Reactome Pathways	1.91895	upregulated
Phase II conjugation Homo sapiens R-HSA-156580	2.96297	12.9254	0.151303	0.0127489	['GSTM4', 'TRMT112', 'NNMT', 'GSS', 'AKR1A1', 'CHAC1', 'GLYAT']	Reactome Pathways	1.89453	upregulated
Glutathione conjugation Homo sapiens R-HSA-156590	4.61717	19.5299	0.169006	0.0145547	['GSTM4', 'GSS', 'AKR1A1', 'CHAC1']	Reactome Pathways	1.837	upregulated
HS-GAG degradation Homo sapiens R-HSA-2024096	6.5332	27.5349	0.169006	0.014778	['GPC1', 'SDC1', 'SGSH']	Reactome Pathways	1.83038	upregulated
Transcriptional activation of mitochondrial biogenesis Homo sapiens R-HSA-2151201	4.36022	17.6813	0.194687	0.0173331	['HELZ2', 'ESRRA', 'RXRA', 'POLRMT']	Reactome Pathways	1.76112	upregulated
MicroRNA (miRNA) biogenesis Homo sapiens R-HSA-203927	5.87928	23.3112	0.209317	0.0189683	['POLR2F', 'POLR2J', 'POLR2L']	Reactome Pathways	1.72197	upregulated
Activation of gene expression by SREBF (SREBP) Homo sapiens R-HSA-2426168	4.13031	16.0718	0.22146	0.0204208	['HELZ2', 'MVK', 'RXRA', 'PMVK']	Reactome Pathways	1.68993	upregulated
Formation of HIV-1 elongation complex containing HIV-1 Tat Homo sapiens R-HSA-167200	4.02419	15.344	0.224039	0.0220833	['CTDP1', 'POLR2F', 'POLR2J', 'POLR2L']	Reactome Pathways	1.65594	upregulated
Tat-mediated elongation of the HIV-1 transcript Homo sapiens R-HSA-167246	4.02419	15.344	0.224039	0.0220833	['CTDP1', 'POLR2F', 'POLR2J', 'POLR2L']	Reactome Pathways	1.65594	upregulated
HIV Transcription Elongation Homo sapiens R-HSA-167169	4.02419	15.344	0.224039	0.0220833	['CTDP1', 'POLR2F', 'POLR2J', 'POLR2L']	Reactome Pathways	1.65594	upregulated
TP53 Regulates Transcription of Cell Death Genes Homo sapiens R-HSA-5633008	4.02419	15.344	0.224039	0.0220833	['TP53I3', 'TMEM219', 'RABGGTA', 'BBC3']	Reactome Pathways	1.65594	upregulated
Formation of HIV elongation complex in the absence of HIV Tat Homo sapiens R-HSA-167152	3.92339	14.6616	0.230563	0.0238261	['CTDP1', 'POLR2F', 'POLR2J', 'POLR2L']	Reactome Pathways	1.62295	upregulated
RNA Polymerase II Transcription Elongation Homo sapiens R-HSA-75955	3.92339	14.6616	0.230563	0.0238261	['CTDP1', 'POLR2F', 'POLR2J', 'POLR2L']	Reactome Pathways	1.62295	upregulated
Formation of RNA Pol II elongation complex Homo sapiens R-HSA-112382	3.92339	14.6616	0.230563	0.0238261	['CTDP1', 'POLR2F', 'POLR2J', 'POLR2L']	Reactome Pathways	1.62295	upregulated
Urea cycle Homo sapiens R-HSA-70635	9.78514	36.2637	0.234214	0.0245757	['SLC25A15', 'NMRAL1']	Reactome Pathways	1.60949	upregulated
FGFR2 alternative splicing Homo sapiens R-HSA-6803529	5.11163	18.5855	0.24029	0.0263593	['POLR2F', 'POLR2J', 'POLR2L']	Reactome Pathways	1.57907	upregulated
A tetrasaccharide linker sequence is required for GAG synthesis Homo sapiens R-HSA-1971475	5.11163	18.5855	0.24029	0.0263593	['B3GAT3', 'GPC1', 'SDC1']	Reactome Pathways	1.57907	upregulated
TNFR1-induced NFkappaB signaling pathway Homo sapiens R-HSA-5357956	5.11163	18.5855	0.24029	0.0263593	['SHARPIN', 'TRAF2', 'RBCK1']	Reactome Pathways	1.57907	upregulated
RNA Pol II CTD phosphorylation and interaction with CE Homo sapiens R-HSA-167160	4.89839	17.3227	0.254587	0.0291179	['POLR2F', 'POLR2J', 'POLR2L']	Reactome Pathways	1.53584	upregulated
RNA Pol II CTD phosphorylation and interaction with CE Homo sapiens R-HSA-77075	4.89839	17.3227	0.254587	0.0291179	['POLR2F', 'POLR2J', 'POLR2L']	Reactome Pathways	1.53584	upregulated
Synthesis And Processing Of GAG, GAGPOL Polyproteins Homo sapiens R-HSA-174495	8.69746	30.6306	0.254587	0.0295467	['VPS37D', 'VPS28']	Reactome Pathways	1.52949	upregulated
Membrane binding and targetting of GAG proteins Homo sapiens R-HSA-174490	8.69746	30.6306	0.254587	0.0295467	['VPS37D', 'VPS28']	Reactome Pathways	1.52949	upregulated
Asparagine N-linked glycosylation Homo sapiens R-HSA-446203	1.91674	6.70164	0.25761	0.030307	['PMM1', 'AMDHD2', 'COL7A1', 'NEU1', 'ALG3', 'MOGS', 'PREB', 'TRAPPC9', 'MAN1B1', 'NUDT14', 'ARF5', 'ARFGAP1']	Reactome Pathways	1.51846	upregulated
RNA Polymerase III Transcription Initiation From Type 3 Promoter Homo sapiens R-HSA-76071	4.70221	16.1817	0.264677	0.0320229	['SNAPC2', 'POLR2F', 'POLR2L']	Reactome Pathways	1.49454	upregulated
Energy dependent regulation of mTOR by LKB1-AMPK Homo sapiens R-HSA-380972	4.70221	16.1817	0.264677	0.0320229	['STK11', 'LAMTOR2', 'LAMTOR4']	Reactome Pathways	1.49454	upregulated
Glycosaminoglycan metabolism Homo sapiens R-HSA-1630316	2.41454	8.28084	0.264677	0.0324008	['CHST12', 'CHPF2', 'B3GAT3', 'HYAL2', 'GPC1', 'SDC1', 'SGSH']	Reactome Pathways	1.48944	upregulated
Mitochondrial biogenesis Homo sapiens R-HSA-1592230	3.48656	11.8134	0.265799	0.0337674	['HELZ2', 'ESRRA', 'RXRA', 'POLRMT']	Reactome Pathways	1.4715	upregulated
Defective EXT1 causes exostoses 1, TRPS2 and CHDS Homo sapiens R-HSA-3656253	7.82731	26.2675	0.265799	0.0348785	['GPC1', 'SDC1']	Reactome Pathways	1.45744	upregulated
Defective EXT2 causes exostoses 2 Homo sapiens R-HSA-3656237	7.82731	26.2675	0.265799	0.0348785	['GPC1', 'SDC1']	Reactome Pathways	1.45744	upregulated
PIWI-interacting RNA (piRNA) biogenesis Homo sapiens R-HSA-5601884	4.52113	15.1472	0.265799	0.0350736	['POLR2F', 'POLR2J', 'POLR2L']	Reactome Pathways	1.45502	upregulated
mRNA Capping Homo sapiens R-HSA-72086	4.52113	15.1472	0.265799	0.0350736	['POLR2F', 'POLR2J', 'POLR2L']	Reactome Pathways	1.45502	upregulated
Activation of BH3-only proteins Homo sapiens R-HSA-114452	4.52113	15.1472	0.265799	0.0350736	['BCL2L11', 'BAD', 'BBC3']	Reactome Pathways	1.45502	upregulated
RNA Polymerase I Promoter Escape Homo sapiens R-HSA-73772	4.35345	14.2058	0.283607	0.0382688	['TAF1C', 'POLR2F', 'POLR2L']	Reactome Pathways	1.41716	upregulated
Nuclear Receptor transcription pathway Homo sapiens R-HSA-383280	3.33785	10.8869	0.283607	0.0383252	['ESRRA', 'NR4A2', 'RXRA', 'NR0B1']	Reactome Pathways	1.41652	upregulated
IRF3-mediated induction of type I IFN Homo sapiens R-HSA-3270619	7.11537	22.8063	0.293173	0.0405502	['TREX1', 'DDX41']	Reactome Pathways	1.39201	upregulated
Assembly Of The HIV Virion Homo sapiens R-HSA-175474	7.11537	22.8063	0.293173	0.0405502	['VPS37D', 'VPS28']	Reactome Pathways	1.39201	upregulated
Gene Expression Homo sapiens R-HSA-74160	1.31736	4.19196	0.294053	0.0414991	['BTG2', 'POP7', 'DDX49', 'BBC3', 'TRMT112', 'STK11', 'SNAPC2', 'RPL36', 'RPL37', 'ZNF324', 'SNRNP35', 'RPL39', 'MEN1', 'ZNF282', 'IMP3', 'POLRMT', 'RABGGTA', 'COX6B1', 'SAP30', 'QTRT1', 'CTU1', 'EEF1D', 'RPL37A', 'DDIT4', 'RPP21', 'CD2BP2', 'TMEM219', 'CTDP1', 'COX5B', 'LAGE3', 'HELZ2', 'PRDX5', 'EXOSC4', 'RXRA', 'TAF1C', 'ZMAT5', 'RPS3', 'POLR2F', 'COX14', 'POLR2J', 'POLR2L', 'ESRRA', 'CPSF4', …	Reactome Pathways	1.38196	upregulated
Regulation of TNFR1 signaling Homo sapiens R-HSA-5357905	4.19776	13.3467	0.294053	0.0416069	['SHARPIN', 'TRAF2', 'RBCK1']	Reactome Pathways	1.38083	upregulated
RNA Polymerase I Transcription Termination Homo sapiens R-HSA-73863	4.0528	12.5603	0.300464	0.0450865	['TAF1C', 'POLR2F', 'POLR2L']	Reactome Pathways	1.34595	upregulated
Glycolysis Homo sapiens R-HSA-70171	4.0528	12.5603	0.300464	0.0450865	['PFKFB4', 'PFKL', 'ALDOC']	Reactome Pathways	1.34595	upregulated
Biosynthesis of the N-glycan precursor (dolichol lipid-linked oligosaccharide, LLO) and transfer to a nascent protein Homo sapiens R-HSA-446193	2.68811	8.29491	0.300464	0.0456947	['PMM1', 'AMDHD2', 'NEU1', 'ALG3', 'NUDT14']	Reactome Pathways	1.34013	upregulated
Heparan sulfate/heparin (HS-GAG) metabolism Homo sapiens R-HSA-1638091	3.1371	9.67384	0.300464	0.0457898	['B3GAT3', 'GPC1', 'SDC1', 'SGSH']	Reactome Pathways	1.33923	upregulated
Assembly of collagen fibrils and other multimeric structures Homo sapiens R-HSA-2022090	3.1371	9.67384	0.300464	0.0457898	['COL18A1', 'LAMB3', 'COL4A1', 'COL7A1']	Reactome Pathways	1.33923	upregulated
Methylation Homo sapiens R-HSA-156581	6.52209	20.0059	0.300464	0.0465414	['TRMT112', 'NNMT']	Reactome Pathways	1.33216	upregulated
TP53 regulates transcription of several additional cell death genes whose specific roles in p53-dependent apoptosis remain uncertain Homo sapiens R-HSA-6803205	6.52209	20.0059	0.300464	0.0465414	['TP53I3', 'RABGGTA']	Reactome Pathways	1.33216	upregulated
Glutathione synthesis and recycling Homo sapiens R-HSA-174403	6.52209	20.0059	0.300464	0.0465414	['GSS', 'CHAC1']	Reactome Pathways	1.33216	upregulated
Fatty acid, triacylglycerol, and ketone body metabolism Homo sapiens R-HSA-535734	1.9021	5.82346	0.300464	0.0468131	['HELZ2', 'ESRRA', 'SLC25A1', 'RXRA', 'DGAT1', 'G0S2', 'ACAD10', 'ACADS', 'ACSF2', 'LPIN3']	Reactome Pathways	1.32963	upregulated
Regulation of cholesterol biosynthesis by SREBP (SREBF) Homo sapiens R-HSA-1655829	3.07543	9.3103	0.306358	0.0484453	['HELZ2', 'MVK', 'RXRA', 'PMVK']	Reactome Pathways	1.31475	upregulated
FGFR2 mutant receptor activation Homo sapiens R-HSA-1839126	3.91751	11.8385	0.306358	0.0487056	['POLR2F', 'POLR2J', 'POLR2L']	Reactome Pathways	1.31242	upregulated
Regulation of innate immune responses to cytosolic DNA Homo sapiens R-HSA-3134975	6.02008	17.7028	0.329027	0.0528327	['TREX1', 'DDX41']	Reactome Pathways	1.2771	upregulated
STING mediated induction of host immune responses Homo sapiens R-HSA-1834941	5.58979	15.782	0.366333	0.0594054	['TREX1', 'DDX41']	Reactome Pathways	1.22617	upregulated
RNA Polymerase III Transcription Initiation Homo sapiens R-HSA-76046	3.56082	9.99557	0.368728	0.0603799	['SNAPC2', 'POLR2F', 'POLR2L']	Reactome Pathways	1.21911	upregulated
TP53 Regulates Transcription of DNA Repair Genes Homo sapiens R-HSA-6796648	2.75085	7.47226	0.393075	0.0661159	['CTDP1', 'POLR2F', 'POLR2J', 'POLR2L']	Reactome Pathways	1.17969	upregulated
N-glycan trimming in the ER and Calnexin/Calreticulin cycle Homo sapiens R-HSA-532668	5.21687	14.1609	0.393075	0.0662416	['MOGS', 'MAN1B1']	Reactome Pathways	1.17887	upregulated
Mitochondrial Fatty Acid Beta-Oxidation Homo sapiens R-HSA-77289	5.21687	14.1609	0.393075	0.0662416	['ACAD10', 'ACADS']	Reactome Pathways	1.17887	upregulated
Activation of HOX genes during differentiation Homo sapiens R-HSA-5619507	2.33478	6.13319	0.411793	0.0723034	['RXRA', 'POLR2F', 'HOXD3', 'POLR2J', 'POLR2L']	Reactome Pathways	1.14084	upregulated
Activation of anterior HOX genes in hindbrain development during early embryogenesis Homo sapiens R-HSA-5617472	2.33478	6.13319	0.411793	0.0723034	['RXRA', 'POLR2F', 'HOXD3', 'POLR2J', 'POLR2L']	Reactome Pathways	1.14084	upregulated
Synthesis of substrates in N-glycan biosythesis Homo sapiens R-HSA-446219	2.65733	6.96755	0.411793	0.0726563	['PMM1', 'AMDHD2', 'NEU1', 'NUDT14']	Reactome Pathways	1.13873	upregulated
mTOR signalling Homo sapiens R-HSA-165159	3.26358	8.53151	0.411793	0.0732295	['STK11', 'LAMTOR2', 'LAMTOR4']	Reactome Pathways	1.13531	upregulated
RNA Polymerase III Chain Elongation Homo sapiens R-HSA-73780	4.89056	12.7784	0.411793	0.073324	['POLR2F', 'POLR2L']	Reactome Pathways	1.13475	upregulated
Pre-NOTCH Processing in Golgi Homo sapiens R-HSA-1912420	4.89056	12.7784	0.411793	0.073324	['ATP2A1', 'RFNG']	Reactome Pathways	1.13475	upregulated
RNA Polymerase II Pre-transcription Events Homo sapiens R-HSA-674695	2.6129	6.73195	0.413836	0.0760454	['CTDP1', 'POLR2F', 'POLR2J', 'POLR2L']	Reactome Pathways	1.11893	upregulated
PKB-mediated events Homo sapiens R-HSA-109703	3.17521	8.10983	0.413836	0.0777617	['STK11', 'LAMTOR2', 'LAMTOR4']	Reactome Pathways	1.10923	upregulated
Conversion from APC/C:Cdc20 to APC/C:Cdh1 in late anaphase Homo sapiens R-HSA-176407	4.60265	11.5886	0.413836	0.0806362	['ANAPC11', 'ANAPC2']	Reactome Pathways	1.09347	upregulated
Phosphorylation of the APC/C Homo sapiens R-HSA-176412	4.60265	11.5886	0.413836	0.0806362	['ANAPC11', 'ANAPC2']	Reactome Pathways	1.09347	upregulated
Defective B3GAT3 causes JDSSDHD Homo sapiens R-HSA-3560801	4.60265	11.5886	0.413836	0.0806362	['GPC1', 'SDC1']	Reactome Pathways	1.09347	upregulated
Defective B3GALT6 causes EDSP2 and SEMDJL1 Homo sapiens R-HSA-4420332	4.60265	11.5886	0.413836	0.0806362	['GPC1', 'SDC1']	Reactome Pathways	1.09347	upregulated
Defective B4GALT7 causes EDS, progeroid type Homo sapiens R-HSA-3560783	4.60265	11.5886	0.413836	0.0806362	['GPC1', 'SDC1']	Reactome Pathways	1.09347	upregulated
RNA Polymerase III Abortive And Retractive Initiation Homo sapiens R-HSA-749476	3.0915	7.71639	0.413836	0.0824136	['SNAPC2', 'POLR2F', 'POLR2L']	Reactome Pathways	1.084	upregulated
RNA Polymerase III Transcription Homo sapiens R-HSA-74158	3.0915	7.71639	0.413836	0.0824136	['SNAPC2', 'POLR2F', 'POLR2L']	Reactome Pathways	1.084	upregulated
TNF signaling Homo sapiens R-HSA-75893	3.0915	7.71639	0.413836	0.0824136	['SHARPIN', 'TRAF2', 'RBCK1']	Reactome Pathways	1.084	upregulated
Triglyceride Biosynthesis Homo sapiens R-HSA-75109	2.52836	6.29112	0.413836	0.0830573	['SLC25A1', 'DGAT1', 'ACSF2', 'LPIN3']	Reactome Pathways	1.08062	upregulated
Cytosolic sensors of pathogen-associated DNA Homo sapiens R-HSA-1834949	2.52836	6.29112	0.413836	0.0830573	['TREX1', 'POLR2F', 'DDX41', 'POLR2L']	Reactome Pathways	1.08062	upregulated
Transcription of the HIV genome Homo sapiens R-HSA-167172	2.4881	6.08476	0.413836	0.0866784	['CTDP1', 'POLR2F', 'POLR2J', 'POLR2L']	Reactome Pathways	1.06209	upregulated
Deactivation of the beta-catenin transactivating complex Homo sapiens R-HSA-3769402	3.01207	7.34872	0.413836	0.0871822	['TLE4', 'PYGO2', 'MEN1']	Reactome Pathways	1.05957	upregulated
BMAL1:CLOCK,NPAS2 activates circadian gene expression Homo sapiens R-HSA-1368108	3.01207	7.34872	0.413836	0.0871822	['HELZ2', 'RXRA', 'SIK1']	Reactome Pathways	1.05957	upregulated
Intrinsic Pathway for Apoptosis Homo sapiens R-HSA-109606	3.01207	7.34872	0.413836	0.0871822	['BCL2L11', 'BAD', 'BBC3']	Reactome Pathways	1.05957	upregulated
Transcriptional regulation of pluripotent stem cells Homo sapiens R-HSA-452723	3.01207	7.34872	0.413836	0.0871822	['POLR2F', 'POLR2J', 'POLR2L']	Reactome Pathways	1.05957	upregulated
Retinoid metabolism and transport Homo sapiens R-HSA-975634	3.01207	7.34872	0.413836	0.0871822	['GPC1', 'SDC1', 'PLB1']	Reactome Pathways	1.05957	upregulated
Viral Messenger RNA Synthesis Homo sapiens R-HSA-168325	3.01207	7.34872	0.413836	0.0871822	['POLR2F', 'POLR2J', 'POLR2L']	Reactome Pathways	1.05957	upregulated
Chondroitin sulfate biosynthesis Homo sapiens R-HSA-2022870	4.34672	10.5563	0.413836	0.0881622	['CHPF2', 'CHST12']	Reactome Pathways	1.05472	upregulated
Inhibition of the proteolytic activity of APC/C required for the onset of anaphase by mitotic spindle checkpoint components Homo sapiens R-HSA-141405	4.34672	10.5563	0.413836	0.0881622	['ANAPC11', 'ANAPC2']	Reactome Pathways	1.05472	upregulated
Inactivation of APC/C via direct inhibition of the APC/C complex Homo sapiens R-HSA-141430	4.34672	10.5563	0.413836	0.0881622	['ANAPC11', 'ANAPC2']	Reactome Pathways	1.05472	upregulated
Signaling by FGFR2 in disease Homo sapiens R-HSA-5655253	2.93662	7.00461	0.428953	0.0920647	['POLR2F', 'POLR2J', 'POLR2L']	Reactome Pathways	1.03591	upregulated
Mitotic Spindle Checkpoint Homo sapiens R-HSA-69618	4.11773	9.65438	0.429925	0.0958868	['ANAPC11', 'ANAPC2']	Reactome Pathways	1.01824	upregulated
RNA Polymerase II Transcription Initiation And Promoter Clearance Homo sapiens R-HSA-76042	2.86485	6.68211	0.429925	0.0970577	['POLR2F', 'POLR2J', 'POLR2L']	Reactome Pathways	1.01297	upregulated
RNA Polymerase II HIV Promoter Escape Homo sapiens R-HSA-167162	2.86485	6.68211	0.429925	0.0970577	['POLR2F', 'POLR2J', 'POLR2L']	Reactome Pathways	1.01297	upregulated
RNA Polymerase II Transcription Initiation Homo sapiens R-HSA-75953	2.86485	6.68211	0.429925	0.0970577	['POLR2F', 'POLR2J', 'POLR2L']	Reactome Pathways	1.01297	upregulated
RNA Polymerase II Transcription Pre-Initiation And Promoter Opening Homo sapiens R-HSA-73779	2.86485	6.68211	0.429925	0.0970577	['POLR2F', 'POLR2J', 'POLR2L']	Reactome Pathways	1.01297	upregulated
HIV Transcription Initiation Homo sapiens R-HSA-167161	2.86485	6.68211	0.429925	0.0970577	['POLR2F', 'POLR2J', 'POLR2L']	Reactome Pathways	1.01297	upregulated
RNA Polymerase II Promoter Escape Homo sapiens R-HSA-73776	2.86485	6.68211	0.429925	0.0970577	['POLR2F', 'POLR2J', 'POLR2L']	Reactome Pathways	1.01297	upregulated
Late Phase of HIV Life Cycle Homo sapiens R-HSA-162599	1.92918	4.40136	0.446233	0.102135	['CTDP1', 'VPS37D', 'POLR2F', 'POLR2J', 'VPS28', 'POLR2L']	Reactome Pathways	0.990826	upregulated
NRAGE signals death through JNK Homo sapiens R-HSA-193648	2.79649	6.37945	0.446233	0.102158	['NGFR', 'BCL2L11', 'BAD']	Reactome Pathways	0.990726	upregulated
mTORC1-mediated signalling Homo sapiens R-HSA-166208	3.91165	8.86118	0.450258	0.103796	['LAMTOR2', 'LAMTOR4']	Reactome Pathways	0.983821	upregulated
NoRC negatively regulates rRNA expression Homo sapiens R-HSA-427413	2.27104	5.01383	0.463491	0.10995	['TAF1C', 'POLR2F', 'SAP30', 'POLR2L']	Reactome Pathways	0.958803	upregulated
RNA Polymerase III Transcription Termination Homo sapiens R-HSA-73980	3.72519	8.15957	0.463491	0.111874	['POLR2F', 'POLR2L']	Reactome Pathways	0.951269	upregulated
Cholesterol biosynthesis Homo sapiens R-HSA-191273	3.72519	8.15957	0.463491	0.111874	['MVK', 'PMVK']	Reactome Pathways	0.951269	upregulated
Laminin interactions Homo sapiens R-HSA-3000157	3.72519	8.15957	0.463491	0.111874	['COL18A1', 'LAMB3']	Reactome Pathways	0.951269	upregulated
Dopamine Neurotransmitter Release Cycle Homo sapiens R-HSA-212676	3.72519	8.15957	0.463491	0.111874	['RIMS1', 'LIN7B']	Reactome Pathways	0.951269	upregulated
APC/C:Cdc20 mediated degradation of Cyclin B Homo sapiens R-HSA-174048	3.72519	8.15957	0.463491	0.111874	['ANAPC11', 'ANAPC2']	Reactome Pathways	0.951269	upregulated
RNA Polymerase I Transcription Initiation Homo sapiens R-HSA-73762	2.66911	5.82746	0.463491	0.112669	['TAF1C', 'POLR2F', 'POLR2L']	Reactome Pathways	0.948195	upregulated
Death Receptor Signalling Homo sapiens R-HSA-73887	2.60966	5.57542	0.463491	0.118073	['SHARPIN', 'TRAF2', 'RBCK1']	Reactome Pathways	0.92785	upregulated
Arachidonate production from DAG Homo sapiens R-HSA-426048	9.76754	20.7984	0.463491	0.118915	['ABHD12']	Reactome Pathways	0.924762	upregulated
Transmission across Electrical Synapses Homo sapiens R-HSA-112307	9.76754	20.7984	0.463491	0.118915	['PANX2']	Reactome Pathways	0.924762	upregulated
Toxicity of botulinum toxin type D (BoNT/D) Homo sapiens R-HSA-5250955	9.76754	20.7984	0.463491	0.118915	['SV2A']	Reactome Pathways	0.924762	upregulated
Toxicity of botulinum toxin type F (BoNT/F) Homo sapiens R-HSA-5250981	9.76754	20.7984	0.463491	0.118915	['SV2A']	Reactome Pathways	0.924762	upregulated
Electric Transmission Across Gap Junctions Homo sapiens R-HSA-112303	9.76754	20.7984	0.463491	0.118915	['PANX2']	Reactome Pathways	0.924762	upregulated
Synthesis of GDP-mannose Homo sapiens R-HSA-446205	9.76754	20.7984	0.463491	0.118915	['PMM1']	Reactome Pathways	0.924762	upregulated
Galactose catabolism Homo sapiens R-HSA-70370	9.76754	20.7984	0.463491	0.118915	['GALT']	Reactome Pathways	0.924762	upregulated
Beta oxidation of hexanoyl-CoA to butanoyl-CoA Homo sapiens R-HSA-77350	9.76754	20.7984	0.463491	0.118915	['ACADS']	Reactome Pathways	0.924762	upregulated
Pyrimidine metabolism Homo sapiens R-HSA-73848	3.55568	7.53572	0.463491	0.12011	['NT5C', 'TK2']	Reactome Pathways	0.920421	upregulated
TNFs bind their physiological receptors Homo sapiens R-HSA-5669034	3.55568	7.53572	0.463491	0.12011	['CD27', 'TNFRSF14']	Reactome Pathways	0.920421	upregulated
Negative epigenetic regulation of rRNA expression Homo sapiens R-HSA-5250941	2.17608	4.56849	0.46994	0.122528	['TAF1C', 'POLR2F', 'SAP30', 'POLR2L']	Reactome Pathways	0.911765	upregulated
RNA polymerase II transcribes snRNA genes Homo sapiens R-HSA-6807505	2.14616	4.43125	0.477893	0.126852	['SNAPC2', 'POLR2F', 'POLR2J', 'POLR2L']	Reactome Pathways	0.896704	upregulated
APC-Cdc20 mediated degradation of Nek2A Homo sapiens R-HSA-179409	3.40091	6.97836	0.477893	0.128489	['ANAPC11', 'ANAPC2']	Reactome Pathways	0.891134	upregulated
Acyl chain remodelling of PC Homo sapiens R-HSA-1482788	3.40091	6.97836	0.477893	0.128489	['LPCAT3', 'PLB1']	Reactome Pathways	0.891134	upregulated
Glyoxylate metabolism and glycine degradation Homo sapiens R-HSA-389661	3.40091	6.97836	0.477893	0.128489	['LIPT2', 'DDO']	Reactome Pathways	0.891134	upregulated
Budding and maturation of HIV virion Homo sapiens R-HSA-162588	3.40091	6.97836	0.477893	0.128489	['VPS37D', 'VPS28']	Reactome Pathways	0.891134	upregulated
Formation of the ternary complex, and subsequently, the 43S complex Homo sapiens R-HSA-72695	2.49835	5.11338	0.477893	0.12916	['RPS25', 'RPS3', 'FAU']	Reactome Pathways	0.888871	upregulated
Metabolism of fat-soluble vitamins Homo sapiens R-HSA-6806667	2.44618	4.90137	0.495981	0.134837	['GPC1', 'SDC1', 'PLB1']	Reactome Pathways	0.870189	upregulated
Diseases associated with glycosaminoglycan metabolism Homo sapiens R-HSA-3560782	3.25904	6.47823	0.497903	0.137	['GPC1', 'SDC1']	Reactome Pathways	0.86328	upregulated
NADE modulates death signalling Homo sapiens R-HSA-205025	7.81363	15.3097	0.497903	0.140948	['NGFR']	Reactome Pathways	0.850942	upregulated
Negative feedback regulation of MAPK pathway Homo sapiens R-HSA-5674499	7.81363	15.3097	0.497903	0.140948	['MAP2K2']	Reactome Pathways	0.850942	upregulated
Conjugation of benzoate with glycine Homo sapiens R-HSA-177135	7.81363	15.3097	0.497903	0.140948	['GLYAT']	Reactome Pathways	0.850942	upregulated
Beta-oxidation of very long chain fatty acids Homo sapiens R-HSA-390247	7.81363	15.3097	0.497903	0.140948	['ACAA1']	Reactome Pathways	0.850942	upregulated
p75NTR negatively regulates cell cycle via SC1 Homo sapiens R-HSA-193670	7.81363	15.3097	0.497903	0.140948	['NGFR']	Reactome Pathways	0.850942	upregulated
HIV Life Cycle Homo sapiens R-HSA-162587	1.74224	3.39478	0.497903	0.142486	['CTDP1', 'VPS37D', 'POLR2F', 'POLR2J', 'VPS28', 'POLR2L']	Reactome Pathways	0.846229	upregulated
Disease Homo sapiens R-HSA-1643685	1.29117	2.49311	0.497903	0.14502	['SPON2', 'CPSF4', 'RPL41', 'CTDP1', 'MAP2K2', 'BAD', 'HDAC11', 'VPS37D', 'RPS25', 'PC', 'SV2A', 'GPC1', 'RPL37A', 'RPL36', 'RPS3', 'POLR2F', 'SDC1', 'RPL37', 'FAU', 'RPL39', 'POLR2J', 'VPS28', 'POLR2L']	Reactome Pathways	0.838573	upregulated
Platelet calcium homeostasis Homo sapiens R-HSA-418360	3.12851	6.02765	0.497903	0.145631	['P2RX6', 'ATP2A1']	Reactome Pathways	0.836748	upregulated
Uptake and actions of bacterial toxins Homo sapiens R-HSA-5339562	3.12851	6.02765	0.497903	0.145631	['MAP2K2', 'SV2A']	Reactome Pathways	0.836748	upregulated
RORA activates gene expression Homo sapiens R-HSA-1368082	3.12851	6.02765	0.497903	0.145631	['HELZ2', 'RXRA']	Reactome Pathways	0.836748	upregulated
RNA Polymerase III Transcription Initiation From Type 2 Promoter Homo sapiens R-HSA-76066	3.12851	6.02765	0.497903	0.145631	['POLR2F', 'POLR2L']	Reactome Pathways	0.836748	upregulated
Formation of TC-NER Pre-Incision Complex Homo sapiens R-HSA-6781823	2.34809	4.51097	0.497903	0.146442	['POLR2F', 'POLR2J', 'POLR2L']	Reactome Pathways	0.834334	upregulated
XBP1(S) activates chaperone genes Homo sapiens R-HSA-381038	2.34809	4.51097	0.497903	0.146442	['KLHDC3', 'PREB', 'ARFGAP1']	Reactome Pathways	0.834334	upregulated
mRNA Splicing Homo sapiens R-HSA-72172	1.7041	3.20236	0.514929	0.152711	['ZMAT5', 'CD2BP2', 'POLR2F', 'SNRNP35', 'POLR2J', 'POLR2L']	Reactome Pathways	0.81613	upregulated
RNA Polymerase III Transcription Initiation From Type 1 Promoter Homo sapiens R-HSA-76061	3.00803	5.62022	0.514929	0.15437	['POLR2F', 'POLR2L']	Reactome Pathways	0.811438	upregulated
Endosomal Sorting Complex Required For Transport (ESCRT) Homo sapiens R-HSA-917729	3.00803	5.62022	0.514929	0.15437	['VPS37D', 'VPS28']	Reactome Pathways	0.811438	upregulated
IRE1alpha activates chaperones Homo sapiens R-HSA-381070	2.25755	4.16042	0.514929	0.158358	['KLHDC3', 'PREB', 'ARFGAP1']	Reactome Pathways	0.80036	upregulated
Phosphate bond hydrolysis by NUDT proteins Homo sapiens R-HSA-2393930	6.51102	11.8338	0.514929	0.162431	['NUDT1']	Reactome Pathways	0.789332	upregulated
Cation-coupled Chloride cotransporters Homo sapiens R-HSA-426117	6.51102	11.8338	0.514929	0.162431	['SLC12A7']	Reactome Pathways	0.789332	upregulated
Transport of nucleosides and free purine and pyrimidine bases across the plasma membrane Homo sapiens R-HSA-83936	6.51102	11.8338	0.514929	0.162431	['SLC29A3']	Reactome Pathways	0.789332	upregulated
Defective HLCS causes multiple carboxylase deficiency Homo sapiens R-HSA-3371599	6.51102	11.8338	0.514929	0.162431	['PC']	Reactome Pathways	0.789332	upregulated
Defects in biotin (Btn) metabolism Homo sapiens R-HSA-3323169	6.51102	11.8338	0.514929	0.162431	['PC']	Reactome Pathways	0.789332	upregulated
Glycerophospholipid catabolism Homo sapiens R-HSA-6814848	6.51102	11.8338	0.514929	0.162431	['PNPLA6']	Reactome Pathways	0.789332	upregulated
Acyl chain remodeling of DAG and TAG Homo sapiens R-HSA-1482883	6.51102	11.8338	0.514929	0.162431	['DGAT1']	Reactome Pathways	0.789332	upregulated
Ubiquinol biosynthesis Homo sapiens R-HSA-2142789	6.51102	11.8338	0.514929	0.162431	['COQ6']	Reactome Pathways	0.789332	upregulated
YAP1- and WWTR1 (TAZ)-stimulated gene expression Homo sapiens R-HSA-2032785	2.89647	5.25056	0.514929	0.163206	['HELZ2', 'RXRA']	Reactome Pathways	0.787263	upregulated
Collagen formation Homo sapiens R-HSA-1474290	1.93339	3.5001	0.514929	0.163599	['COL18A1', 'LAMB3', 'COL4A1', 'COL7A1']	Reactome Pathways	0.786221	upregulated
RNA Polymerase I, RNA Polymerase III, and Mitochondrial Transcription Homo sapiens R-HSA-504046	1.7644	3.17474	0.514929	0.165409	['SNAPC2', 'TAF1C', 'POLR2F', 'POLRMT', 'POLR2L']	Reactome Pathways	0.78144	upregulated
Generic Transcription Pathway Homo sapiens R-HSA-212436	1.25145	2.24263	0.514929	0.166623	['BTG2', 'CTDP1', 'COX5B', 'BBC3', 'HELZ2', 'PRDX5', 'STK11', 'RXRA', 'POLR2F', 'COX14', 'ZNF324', 'POLR2J', 'MEN1', 'POLR2L', 'ESRRA', 'ZNF282', 'NR0B1', 'RABGGTA', 'COX6B1', 'NR4A2', 'TP53I3', 'DDIT4', 'TMEM219', 'LAMTOR2', 'LAMTOR4']	Reactome Pathways	0.778264	upregulated
Unfolded Protein Response (UPR) Homo sapiens R-HSA-381119	1.90972	3.40154	0.514929	0.16844	['KLHDC3', 'EXOSC4', 'PREB', 'ARFGAP1']	Reactome Pathways	0.773555	upregulated
Ribosomal scanning and start codon recognition Homo sapiens R-HSA-72702	2.17371	3.84459	0.514929	0.170559	['RPS25', 'RPS3', 'FAU']	Reactome Pathways	0.768126	upregulated
tRNA processing in the nucleus Homo sapiens R-HSA-6784531	2.17371	3.84459	0.514929	0.170559	['CPSF4', 'POP7', 'RPP21']	Reactome Pathways	0.768126	upregulated
RNA Polymerase I Chain Elongation Homo sapiens R-HSA-73777	2.17371	3.84459	0.514929	0.170559	['TAF1C', 'POLR2F', 'POLR2L']	Reactome Pathways	0.768126	upregulated
Translation initiation complex formation Homo sapiens R-HSA-72649	2.17371	3.84459	0.514929	0.170559	['RPS25', 'RPS3', 'FAU']	Reactome Pathways	0.768126	upregulated
Metabolism of nucleotides Homo sapiens R-HSA-15869	1.88661	3.30638	0.514929	0.173331	['NT5C', 'NUDT1', 'TK2', 'APRT']	Reactome Pathways	0.761124	upregulated
B-WICH complex positively regulates rRNA expression Homo sapiens R-HSA-5250924	2.13408	3.6983	0.514929	0.176758	['TAF1C', 'POLR2F', 'POLR2L']	Reactome Pathways	0.752622	upregulated
rRNA modification in the nucleus Homo sapiens R-HSA-6790901	2.13408	3.6983	0.514929	0.176758	['TRMT112', 'DDX49', 'IMP3']	Reactome Pathways	0.752622	upregulated
Activation of the mRNA upon binding of the cap-binding complex and eIFs, and subsequent binding to 43S Homo sapiens R-HSA-72662	2.13408	3.6983	0.514929	0.176758	['RPS25', 'RPS3', 'FAU']	Reactome Pathways	0.752622	upregulated
Formation of the beta-catenin:TCF transactivating complex Homo sapiens R-HSA-201722	2.13408	3.6983	0.514929	0.176758	['TLE4', 'PYGO2', 'MEN1']	Reactome Pathways	0.752622	upregulated
HS-GAG biosynthesis Homo sapiens R-HSA-2022928	2.69644	4.60695	0.514929	0.181132	['GPC1', 'SDC1']	Reactome Pathways	0.742005	upregulated
Neurotransmitter Clearance In The Synaptic Cleft Homo sapiens R-HSA-112311	5.58059	9.46585	0.514929	0.183377	['ALDH2']	Reactome Pathways	0.736655	upregulated
Axonal growth inhibition (RHOA activation) Homo sapiens R-HSA-193634	5.58059	9.46585	0.514929	0.183377	['NGFR']	Reactome Pathways	0.736655	upregulated
Regulation of cytoskeletal remodeling and cell spreading by IPP complex components Homo sapiens R-HSA-446388	5.58059	9.46585	0.514929	0.183377	['TESK1']	Reactome Pathways	0.736655	upregulated
VEGF binds to VEGFR leading to receptor dimerization Homo sapiens R-HSA-195399	5.58059	9.46585	0.514929	0.183377	['VEGFB']	Reactome Pathways	0.736655	upregulated
VEGF ligand-receptor interactions Homo sapiens R-HSA-194313	5.58059	9.46585	0.514929	0.183377	['VEGFB']	Reactome Pathways	0.736655	upregulated
Activation of PUMA and translocation to mitochondria Homo sapiens R-HSA-139915	5.58059	9.46585	0.514929	0.183377	['BBC3']	Reactome Pathways	0.736655	upregulated
AMPK inhibits chREBP transcriptional activation activity Homo sapiens R-HSA-163680	5.58059	9.46585	0.514929	0.183377	['STK11']	Reactome Pathways	0.736655	upregulated
mitochondrial fatty acid beta-oxidation of saturated fatty acids Homo sapiens R-HSA-77286	5.58059	9.46585	0.514929	0.183377	['ACADS']	Reactome Pathways	0.736655	upregulated
Metabolism of ingested SeMet, Sec, MeSec into H2Se Homo sapiens R-HSA-2408508	5.58059	9.46585	0.514929	0.183377	['NNMT']	Reactome Pathways	0.736655	upregulated
Conjugation of salicylate with glycine Homo sapiens R-HSA-177128	5.58059	9.46585	0.514929	0.183377	['GLYAT']	Reactome Pathways	0.736655	upregulated
Interleukin-17 signaling Homo sapiens R-HSA-448424	5.58059	9.46585	0.514929	0.183377	['IL17RC']	Reactome Pathways	0.736655	upregulated
Synthesis of UDP-N-acetyl-glucosamine Homo sapiens R-HSA-446210	5.58059	9.46585	0.514929	0.183377	['AMDHD2']	Reactome Pathways	0.736655	upregulated
Activation of Matrix Metalloproteinases Homo sapiens R-HSA-1592389	2.60643	4.32581	0.529367	0.190202	['COL18A1', 'MMP15']	Reactome Pathways	0.720786	upregulated
Resolution of D-loop Structures through Holliday Junction Intermediates Homo sapiens R-HSA-5693568	2.60643	4.32581	0.529367	0.190202	['MUS81', 'SLX1A']	Reactome Pathways	0.720786	upregulated
Cell death signalling via NRAGE, NRIF and NADE Homo sapiens R-HSA-204998	2.02338	3.30038	0.533396	0.19571	['NGFR', 'BCL2L11', 'BAD']	Reactome Pathways	0.708387	upregulated
Resolution of D-Loop Structures Homo sapiens R-HSA-5693537	2.52222	4.06781	0.533396	0.199331	['MUS81', 'SLX1A']	Reactome Pathways	0.700426	upregulated
Cargo concentration in the ER Homo sapiens R-HSA-5694530	2.52222	4.06781	0.533396	0.199331	['COL7A1', 'PREB']	Reactome Pathways	0.700426	upregulated
Gap-filling DNA repair synthesis and ligation in TC-NER Homo sapiens R-HSA-6782210	1.98898	3.18002	0.533396	0.202135	['POLR2F', 'POLR2J', 'POLR2L']	Reactome Pathways	0.694358	upregulated
MAPK1 (ERK2) activation Homo sapiens R-HSA-112411	4.88277	7.76659	0.533396	0.203801	['MAP2K2']	Reactome Pathways	0.690794	upregulated
Pyrimidine salvage reactions Homo sapiens R-HSA-73614	4.88277	7.76659	0.533396	0.203801	['TK2']	Reactome Pathways	0.690794	upregulated
Conjugation of carboxylic acids Homo sapiens R-HSA-159424	4.88277	7.76659	0.533396	0.203801	['GLYAT']	Reactome Pathways	0.690794	upregulated
Mitochondrial iron-sulfur cluster biogenesis Homo sapiens R-HSA-1362409	4.88277	7.76659	0.533396	0.203801	['SLC25A28']	Reactome Pathways	0.690794	upregulated
p75NTR regulates axonogenesis Homo sapiens R-HSA-193697	4.88277	7.76659	0.533396	0.203801	['NGFR']	Reactome Pathways	0.690794	upregulated
Type I hemidesmosome assembly Homo sapiens R-HSA-446107	4.88277	7.76659	0.533396	0.203801	['LAMB3']	Reactome Pathways	0.690794	upregulated
Inactivation of Cdc42 and Rac Homo sapiens R-HSA-428543	4.88277	7.76659	0.533396	0.203801	['GPC1']	Reactome Pathways	0.690794	upregulated
Role of Abl in Robo-Slit signaling Homo sapiens R-HSA-428890	4.88277	7.76659	0.533396	0.203801	['GPC1']	Reactome Pathways	0.690794	upregulated
Amino Acid conjugation Homo sapiens R-HSA-156587	4.88277	7.76659	0.533396	0.203801	['GLYAT']	Reactome Pathways	0.690794	upregulated
RHO GTPases Activate Rhotekin and Rhophilins Homo sapiens R-HSA-5666185	4.88277	7.76659	0.533396	0.203801	['LIN7B']	Reactome Pathways	0.690794	upregulated
Lipoprotein metabolism Homo sapiens R-HSA-174824	2.44327	3.83049	0.533396	0.20851	['SDC1', 'PLTP']	Reactome Pathways	0.680874	upregulated
Purine metabolism Homo sapiens R-HSA-73847	2.44327	3.83049	0.533396	0.20851	['NT5C', 'APRT']	Reactome Pathways	0.680874	upregulated
Signaling by FGFR in disease Homo sapiens R-HSA-1226099	1.95573	3.06521	0.533396	0.208609	['POLR2F', 'POLR2J', 'POLR2L']	Reactome Pathways	0.680666	upregulated
Collagen biosynthesis and modifying enzymes Homo sapiens R-HSA-1650814	1.95573	3.06521	0.533396	0.208609	['COL18A1', 'COL4A1', 'COL7A1']	Reactome Pathways	0.680666	upregulated
Dual incision in TC-NER Homo sapiens R-HSA-6782135	1.95573	3.06521	0.533396	0.208609	['POLR2F', 'POLR2J', 'POLR2L']	Reactome Pathways	0.680666	upregulated
Circadian Clock Homo sapiens R-HSA-400253	1.95573	3.06521	0.533396	0.208609	['HELZ2', 'RXRA', 'SIK1']	Reactome Pathways	0.680666	upregulated
Metabolism of lipids and lipoproteins Homo sapiens R-HSA-556833	1.22985	1.88097	0.551737	0.21666	['ESRRA', 'SLC25A1', 'MVK', 'DGAT1', 'G0S2', 'ACSF2', 'PLB1', 'COQ6', 'HELZ2', 'RXRA', 'LPCAT3', 'PMVK', 'NEU1', 'SDC1', 'PNPLA6', 'ACAA1', 'PLTP', 'ACAD10', 'ACADS', 'LPIN3']	Reactome Pathways	0.664221	upregulated
Fanconi Anemia Pathway Homo sapiens R-HSA-6783310	2.36911	3.6117	0.55183	0.217731	['MUS81', 'SLX1A']	Reactome Pathways	0.662079	upregulated
Purine catabolism Homo sapiens R-HSA-74259	4.34001	6.49866	0.55183	0.223715	['NT5C']	Reactome Pathways	0.650305	upregulated
Neurotoxicity of clostridium toxins Homo sapiens R-HSA-168799	4.34001	6.49866	0.55183	0.223715	['SV2A']	Reactome Pathways	0.650305	upregulated
Creatine metabolism Homo sapiens R-HSA-71288	4.34001	6.49866	0.55183	0.223715	['GAMT']	Reactome Pathways	0.650305	upregulated
Tetrahydrobiopterin (BH4) synthesis, recycling, salvage and regulation Homo sapiens R-HSA-1474151	4.34001	6.49866	0.55183	0.223715	['GCHFR']	Reactome Pathways	0.650305	upregulated
ER Quality Control Compartment (ERQC) Homo sapiens R-HSA-901032	4.34001	6.49866	0.55183	0.223715	['MAN1B1']	Reactome Pathways	0.650305	upregulated
Regulation of signaling by NODAL Homo sapiens R-HSA-1433617	4.34001	6.49866	0.55183	0.223715	['ACVR1B']	Reactome Pathways	0.650305	upregulated
Regulated proteolysis of p75NTR Homo sapiens R-HSA-193692	4.34001	6.49866	0.55183	0.223715	['NGFR']	Reactome Pathways	0.650305	upregulated
ER to Golgi Anterograde Transport Homo sapiens R-HSA-199977	1.55315	2.27772	0.566906	0.230728	['COL7A1', 'PREB', 'TRAPPC9', 'ARFGAP1', 'ARF5']	Reactome Pathways	0.6369	upregulated
COPII (Coat Protein 2) Mediated Vesicle Transport Homo sapiens R-HSA-204005	1.80483	2.56369	0.577093	0.241603	['COL7A1', 'PREB', 'TRAPPC9']	Reactome Pathways	0.616898	upregulated
Interferon alpha/beta signaling Homo sapiens R-HSA-909733	1.80483	2.56369	0.577093	0.241603	['STAT2', 'GBP2', 'OASL']	Reactome Pathways	0.616898	upregulated
Uptake and function of anthrax toxins Homo sapiens R-HSA-5210891	3.90581	5.52341	0.577093	0.243132	['MAP2K2']	Reactome Pathways	0.614159	upregulated
RHO GTPases activate IQGAPs Homo sapiens R-HSA-5626467	3.90581	5.52341	0.577093	0.243132	['MEN1']	Reactome Pathways	0.614159	upregulated
Import of palmitoyl-CoA into the mitochondrial matrix Homo sapiens R-HSA-200425	3.90581	5.52341	0.577093	0.243132	['RXRA']	Reactome Pathways	0.614159	upregulated
Biotin transport and metabolism Homo sapiens R-HSA-196780	3.90581	5.52341	0.577093	0.243132	['PC']	Reactome Pathways	0.614159	upregulated
CASP8 activity is inhibited Homo sapiens R-HSA-5218900	3.90581	5.52341	0.577093	0.243132	['TRAF2']	Reactome Pathways	0.614159	upregulated
Regulation by c-FLIP Homo sapiens R-HSA-3371378	3.90581	5.52341	0.577093	0.243132	['TRAF2']	Reactome Pathways	0.614159	upregulated
Dimerization of procaspase-8 Homo sapiens R-HSA-69416	3.90581	5.52341	0.577093	0.243132	['TRAF2']	Reactome Pathways	0.614159	upregulated
MAP2K and MAPK activation Homo sapiens R-HSA-5674135	2.17135	3.04893	0.580697	0.245573	['MAP2K2', 'LAMTOR2']	Reactome Pathways	0.609819	upregulated
Glycerophospholipid biosynthesis Homo sapiens R-HSA-1483206	1.59661	2.20289	0.592831	0.251647	['DGAT1', 'LPCAT3', 'PLB1', 'LPIN3']	Reactome Pathways	0.599208	upregulated
Collagen degradation Homo sapiens R-HSA-1442490	2.11256	2.88771	0.598228	0.254889	['COL18A1', 'MMP15']	Reactome Pathways	0.593649	upregulated
Pyrimidine catabolism Homo sapiens R-HSA-73621	3.55056	4.75479	0.599411	0.262064	['NT5C']	Reactome Pathways	0.581593	upregulated
Caspase-mediated cleavage of cytoskeletal proteins Homo sapiens R-HSA-264870	3.55056	4.75479	0.599411	0.262064	['GSN']	Reactome Pathways	0.581593	upregulated
Ethanol oxidation Homo sapiens R-HSA-71384	3.55056	4.75479	0.599411	0.262064	['ALDH2']	Reactome Pathways	0.581593	upregulated
Hyaluronan uptake and degradation Homo sapiens R-HSA-2160916	3.55056	4.75479	0.599411	0.262064	['HYAL2']	Reactome Pathways	0.581593	upregulated
mRNA decay by 3' to 5' exoribonuclease Homo sapiens R-HSA-429958	3.55056	4.75479	0.599411	0.262064	['EXOSC4']	Reactome Pathways	0.581593	upregulated
Reduction of cytosolic Ca++ levels Homo sapiens R-HSA-418359	3.55056	4.75479	0.599411	0.262064	['ATP2A1']	Reactome Pathways	0.581593	upregulated
TP53 Regulates Transcription of Death Receptors and Ligands Homo sapiens R-HSA-6803211	3.55056	4.75479	0.599411	0.262064	['TMEM219']	Reactome Pathways	0.581593	upregulated
Transcriptional regulation by small RNAs Homo sapiens R-HSA-5578749	1.69985	2.2347	0.608445	0.26857	['POLR2F', 'POLR2J', 'POLR2L']	Reactome Pathways	0.570943	upregulated
Positive epigenetic regulation of rRNA expression Homo sapiens R-HSA-5250913	1.67548	2.16078	0.608445	0.275368	['TAF1C', 'POLR2F', 'POLR2L']	Reactome Pathways	0.560087	upregulated
alpha-linolenic acid (ALA) metabolism Homo sapiens R-HSA-2046106	3.25451	4.1368	0.608445	0.280523	['ACAA1']	Reactome Pathways	0.552031	upregulated
Trafficking and processing of endosomal TLR Homo sapiens R-HSA-1679131	3.25451	4.1368	0.608445	0.280523	['CNPY3']	Reactome Pathways	0.552031	upregulated
alpha-linolenic (omega3) and linoleic (omega6) acid metabolism Homo sapiens R-HSA-2046104	3.25451	4.1368	0.608445	0.280523	['ACAA1']	Reactome Pathways	0.552031	upregulated
NF-kB is activated and signals survival Homo sapiens R-HSA-209560	3.25451	4.1368	0.608445	0.280523	['NGFR']	Reactome Pathways	0.552031	upregulated
Synthesis of PE Homo sapiens R-HSA-1483213	3.25451	4.1368	0.608445	0.280523	['LPIN3']	Reactome Pathways	0.552031	upregulated
AKT phosphorylates targets in the cytosol Homo sapiens R-HSA-198323	3.25451	4.1368	0.608445	0.280523	['BAD']	Reactome Pathways	0.552031	upregulated
Purine salvage Homo sapiens R-HSA-74217	3.25451	4.1368	0.608445	0.280523	['APRT']	Reactome Pathways	0.552031	upregulated
TNFR1-induced proapoptotic signaling Homo sapiens R-HSA-5357786	3.25451	4.1368	0.608445	0.280523	['TRAF2']	Reactome Pathways	0.552031	upregulated
p75NTR recruits signalling complexes Homo sapiens R-HSA-209543	3.25451	4.1368	0.608445	0.280523	['NGFR']	Reactome Pathways	0.552031	upregulated
Signaling by Activin Homo sapiens R-HSA-1502540	3.25451	4.1368	0.608445	0.280523	['ACVR1B']	Reactome Pathways	0.552031	upregulated
Retrograde neurotrophin signalling Homo sapiens R-HSA-177504	3.25451	4.1368	0.608445	0.280523	['DNAL4']	Reactome Pathways	0.552031	upregulated
Depolarization of the Presynaptic Terminal Triggers the Opening of Calcium Channels Homo sapiens R-HSA-112308	3.25451	4.1368	0.608445	0.280523	['CACFD1']	Reactome Pathways	0.552031	upregulated
Facilitative Na+-independent glucose transporters Homo sapiens R-HSA-428790	3.25451	4.1368	0.608445	0.280523	['SLC2A6']	Reactome Pathways	0.552031	upregulated
Fatty Acyl-CoA Biosynthesis Homo sapiens R-HSA-75105	1.95382	2.46734	0.609294	0.282852	['SLC25A1', 'ACSF2']	Reactome Pathways	0.548441	upregulated
Non-integrin membrane-ECM interactions Homo sapiens R-HSA-3000171	1.95382	2.46734	0.609294	0.282852	['LAMB3', 'SDC1']	Reactome Pathways	0.548441	upregulated
Metabolism of proteins Homo sapiens R-HSA-392499	1.12839	1.39588	0.623074	0.290239	['SPON2', 'PIGQ', 'TRMT112', 'EXOSC4', 'AMDHD2', 'NEU1', 'RPL36', 'RPS3', 'RPL37', 'RPL39', 'NUDT14', 'TIMM8B', 'KLHDC3', 'RPL41', 'GSN', 'FBXW5', 'PMM1', 'ALG3', 'MOGS', 'TRAPPC9', 'ARFGAP1', 'RPS25', 'EEF1D', 'COL7A1', 'RPL37A', 'TOMM7', 'PREB', 'FAU', 'MAN1B1', 'ARF5']	Reactome Pathways	0.537244	upregulated
Transcription-Coupled Nucleotide Excision Repair (TC-NER) Homo sapiens R-HSA-6781827	1.60638	1.95639	0.625901	0.295854	['POLR2F', 'POLR2J', 'POLR2L']	Reactome Pathways	0.528922	upregulated
RNA Polymerase I Promoter Clearance Homo sapiens R-HSA-73854	1.60638	1.95639	0.625901	0.295854	['TAF1C', 'POLR2F', 'POLR2L']	Reactome Pathways	0.528922	upregulated
Repression of WNT target genes Homo sapiens R-HSA-4641265	3.00401	3.63158	0.625901	0.298522	['TLE4']	Reactome Pathways	0.525024	upregulated
Activation of Rac Homo sapiens R-HSA-428540	3.00401	3.63158	0.625901	0.298522	['GPC1']	Reactome Pathways	0.525024	upregulated
Regulation of necroptotic cell death Homo sapiens R-HSA-5675482	3.00401	3.63158	0.625901	0.298522	['TRAF2']	Reactome Pathways	0.525024	upregulated
Regulation of pyruvate dehydrogenase (PDH) complex Homo sapiens R-HSA-204174	3.00401	3.63158	0.625901	0.298522	['RXRA']	Reactome Pathways	0.525024	upregulated
Nicotinate metabolism Homo sapiens R-HSA-196807	3.00401	3.63158	0.625901	0.298522	['NADSYN1']	Reactome Pathways	0.525024	upregulated
Metabolism of vitamins and cofactors Homo sapiens R-HSA-196854	1.36731	1.59348	0.635889	0.311794	['PC', 'GPC1', 'SDC1', 'NADSYN1', 'PLB1']	Reactome Pathways	0.506133	upregulated
PPARA activates gene expression Homo sapiens R-HSA-1989781	1.43467	1.66649	0.635889	0.31299	['HELZ2', 'ESRRA', 'RXRA', 'G0S2']	Reactome Pathways	0.504469	upregulated
Elevation of cytosolic Ca2+ levels Homo sapiens R-HSA-139853	2.78929	3.21268	0.635889	0.316071	['P2RX6']	Reactome Pathways	0.500215	upregulated
Depolymerisation of the Nuclear Lamina Homo sapiens R-HSA-4419969	2.78929	3.21268	0.635889	0.316071	['LPIN3']	Reactome Pathways	0.500215	upregulated
Glycogen breakdown (glycogenolysis) Homo sapiens R-HSA-70221	2.78929	3.21268	0.635889	0.316071	['PHKG1']	Reactome Pathways	0.500215	upregulated
NRIF signals cell death from the nucleus Homo sapiens R-HSA-205043	2.78929	3.21268	0.635889	0.316071	['NGFR']	Reactome Pathways	0.500215	upregulated
Synthesis of bile acids and bile salts via 27-hydroxycholesterol Homo sapiens R-HSA-193807	2.78929	3.21268	0.635889	0.316071	['RXRA']	Reactome Pathways	0.500215	upregulated
Recycling of bile acids and salts Homo sapiens R-HSA-159418	2.78929	3.21268	0.635889	0.316071	['RXRA']	Reactome Pathways	0.500215	upregulated
Calnexin/calreticulin cycle Homo sapiens R-HSA-901042	2.78929	3.21268	0.635889	0.316071	['MAN1B1']	Reactome Pathways	0.500215	upregulated
Activation of BAD and translocation to mitochondria Homo sapiens R-HSA-111447	2.78929	3.21268	0.635889	0.316071	['BAD']	Reactome Pathways	0.500215	upregulated
PI3K Cascade Homo sapiens R-HSA-109704	1.54273	1.77516	0.635889	0.316428	['STK11', 'LAMTOR2', 'LAMTOR4']	Reactome Pathways	0.499725	upregulated
Transcriptional regulation of white adipocyte differentiation Homo sapiens R-HSA-381340	1.54273	1.77516	0.635889	0.316428	['HELZ2', 'RXRA', 'CEBPD']	Reactome Pathways	0.499725	upregulated
RNA Polymerase I Transcription Homo sapiens R-HSA-73864	1.54273	1.77516	0.635889	0.316428	['TAF1C', 'POLR2F', 'POLR2L']	Reactome Pathways	0.499725	upregulated
Epigenetic regulation of gene expression Homo sapiens R-HSA-212165	1.40867	1.5862	0.649673	0.32432	['TAF1C', 'POLR2F', 'SAP30', 'POLR2L']	Reactome Pathways	0.489026	upregulated
Antigen processing: Ubiquitination & Proteasome degradation Homo sapiens R-HSA-983168	1.24197	1.39287	0.650545	0.325789	['FBXL8', 'TRIM9', 'RNF126', 'TRIM41', 'ASB6', 'RBCK1', 'ANAPC11', 'ANAPC2']	Reactome Pathways	0.487063	upregulated
NOTCH1 Intracellular Domain Regulates Transcription Homo sapiens R-HSA-2122947	1.73628	1.92929	0.650843	0.329175	['TLE4', 'HDAC11']	Reactome Pathways	0.482573	upregulated
Regulation of lipid metabolism by Peroxisome proliferator-activated receptor alpha (PPARalpha) Homo sapiens R-HSA-400206	1.39603	1.54774	0.650843	0.329995	['HELZ2', 'ESRRA', 'RXRA', 'G0S2']	Reactome Pathways	0.481492	upregulated
Cell-extracellular matrix interactions Homo sapiens R-HSA-446353	2.60321	2.8611	0.650843	0.333182	['TESK1']	Reactome Pathways	0.477319	upregulated
Regulated Necrosis Homo sapiens R-HSA-5218859	2.60321	2.8611	0.650843	0.333182	['TRAF2']	Reactome Pathways	0.477319	upregulated
RIPK1-mediated regulated necrosis Homo sapiens R-HSA-5213460	2.60321	2.8611	0.650843	0.333182	['TRAF2']	Reactome Pathways	0.477319	upregulated
p75NTR signals via NF-kB Homo sapiens R-HSA-193639	2.60321	2.8611	0.650843	0.333182	['NGFR']	Reactome Pathways	0.477319	upregulated
Synthesis of glycosylphosphatidylinositol (GPI) Homo sapiens R-HSA-162710	2.60321	2.8611	0.650843	0.333182	['PIGQ']	Reactome Pathways	0.477319	upregulated
p75 NTR receptor-mediated signalling Homo sapiens R-HSA-193704	1.46529	1.56412	0.65271	0.343886	['NGFR', 'BCL2L11', 'BAD']	Reactome Pathways	0.463585	upregulated
Retrograde transport at the Trans-Golgi-Network Homo sapiens R-HSA-6811440	1.66222	1.75699	0.65271	0.347493	['VPS51', 'STX10']	Reactome Pathways	0.459054	upregulated
Ligand-dependent caspase activation Homo sapiens R-HSA-140534	2.44038	2.5629	0.65271	0.349866	['TRAF2']	Reactome Pathways	0.456099	upregulated
Tristetraprolin (TTP, ZFP36) binds and destabilizes mRNA Homo sapiens R-HSA-450513	2.44038	2.5629	0.65271	0.349866	['EXOSC4']	Reactome Pathways	0.456099	upregulated
Acyl chain remodelling of PS Homo sapiens R-HSA-1482801	2.44038	2.5629	0.65271	0.349866	['LPCAT3']	Reactome Pathways	0.456099	upregulated
Butyrate Response Factor 1 (BRF1) binds and destabilizes mRNA Homo sapiens R-HSA-450385	2.44038	2.5629	0.65271	0.349866	['EXOSC4']	Reactome Pathways	0.456099	upregulated
G1/S-Specific Transcription Homo sapiens R-HSA-69205	2.44038	2.5629	0.65271	0.349866	['TK2']	Reactome Pathways	0.456099	upregulated
Chylomicron-mediated lipid transport Homo sapiens R-HSA-174800	2.44038	2.5629	0.65271	0.349866	['SDC1']	Reactome Pathways	0.456099	upregulated
Acetylcholine Neurotransmitter Release Cycle Homo sapiens R-HSA-264642	2.44038	2.5629	0.65271	0.349866	['RIMS1']	Reactome Pathways	0.456099	upregulated
Hyaluronan metabolism Homo sapiens R-HSA-2142845	2.44038	2.5629	0.65271	0.349866	['HYAL2']	Reactome Pathways	0.456099	upregulated
TNF receptor superfamily (TNFSF) members mediating non-canonical NF-kB pathway Homo sapiens R-HSA-5676594	2.44038	2.5629	0.65271	0.349866	['TRAF2']	Reactome Pathways	0.456099	upregulated
KSRP (KHSRP) binds and destabilizes mRNA Homo sapiens R-HSA-450604	2.44038	2.5629	0.65271	0.349866	['EXOSC4']	Reactome Pathways	0.456099	upregulated
Mitochondrial translation initiation Homo sapiens R-HSA-5368286	1.44713	1.51617	0.65271	0.350741	['MRPL52', 'AURKAIP1', 'MRPL54']	Reactome Pathways	0.455014	upregulated
Mitochondrial translation termination Homo sapiens R-HSA-5419276	1.44713	1.51617	0.65271	0.350741	['MRPL52', 'AURKAIP1', 'MRPL54']	Reactome Pathways	0.455014	upregulated
Mitochondrial translation elongation Homo sapiens R-HSA-5389840	1.44713	1.51617	0.65271	0.350741	['MRPL52', 'AURKAIP1', 'MRPL54']	Reactome Pathways	0.455014	upregulated
Metabolism of polyamines Homo sapiens R-HSA-351202	1.44713	1.51617	0.65271	0.350741	['GAMT', 'SLC25A15', 'NMRAL1']	Reactome Pathways	0.455014	upregulated
Processing of Capped Intron-Containing Pre-mRNA Homo sapiens R-HSA-72203	1.25439	1.30693	0.654587	0.35279	['ZMAT5', 'CD2BP2', 'POLR2F', 'SNRNP35', 'POLR2J', 'POLR2L']	Reactome Pathways	0.452484	upregulated
Signaling by NOTCH Homo sapiens R-HSA-157118	1.32463	1.33825	0.66947	0.364115	['TLE4', 'HDAC11', 'ATP2A1', 'RFNG']	Reactome Pathways	0.438761	upregulated
Neurotransmitter Release Cycle Homo sapiens R-HSA-112310	1.59421	1.60394	0.66947	0.365641	['RIMS1', 'LIN7B']	Reactome Pathways	0.436945	upregulated
Serotonin Neurotransmitter Release Cycle Homo sapiens R-HSA-181429	2.29671	2.30764	0.66947	0.366133	['RIMS1']	Reactome Pathways	0.436361	upregulated
Norepinephrine Neurotransmitter Release Cycle Homo sapiens R-HSA-181430	2.29671	2.30764	0.66947	0.366133	['RIMS1']	Reactome Pathways	0.436361	upregulated
Defects in vitamin and cofactor metabolism Homo sapiens R-HSA-3296482	2.29671	2.30764	0.66947	0.366133	['PC']	Reactome Pathways	0.436361	upregulated
RNA Polymerase II Transcription Homo sapiens R-HSA-73857	1.30242	1.27577	0.67874	0.375485	['CTDP1', 'POLR2F', 'POLR2J', 'POLR2L']	Reactome Pathways	0.425408	upregulated
Phospholipid metabolism Homo sapiens R-HSA-1483257	1.25253	1.22486	0.67874	0.376097	['DGAT1', 'LPCAT3', 'PNPLA6', 'PLB1', 'LPIN3']	Reactome Pathways	0.4247	upregulated
Diseases of glycosylation Homo sapiens R-HSA-3781865	1.37874	1.34111	0.67874	0.37806	['SPON2', 'GPC1', 'SDC1']	Reactome Pathways	0.422439	upregulated
Transport to the Golgi and subsequent modification Homo sapiens R-HSA-948021	1.24448	1.20067	0.67874	0.381062	['COL7A1', 'PREB', 'TRAPPC9', 'ARFGAP1', 'ARF5']	Reactome Pathways	0.419004	upregulated
Other semaphorin interactions Homo sapiens R-HSA-416700	2.169	2.08734	0.67874	0.381994	['PLXNB3']	Reactome Pathways	0.417944	upregulated
Scavenging by Class A Receptors Homo sapiens R-HSA-3000480	2.169	2.08734	0.67874	0.381994	['COL4A1']	Reactome Pathways	0.417944	upregulated
GABA synthesis, release, reuptake and degradation Homo sapiens R-HSA-888590	2.169	2.08734	0.67874	0.381994	['RIMS1']	Reactome Pathways	0.417944	upregulated
HDL-mediated lipid transport Homo sapiens R-HSA-194223	2.169	2.08734	0.67874	0.381994	['PLTP']	Reactome Pathways	0.417944	upregulated
TP53 Regulates Transcription of Genes Involved in Cytochrome C Release Homo sapiens R-HSA-6803204	2.169	2.08734	0.67874	0.381994	['BBC3']	Reactome Pathways	0.417944	upregulated
Signaling by NODAL Homo sapiens R-HSA-1181150	2.169	2.08734	0.67874	0.381994	['ACVR1B']	Reactome Pathways	0.417944	upregulated
Apoptosis Homo sapiens R-HSA-109581	1.23654	1.177	0.683974	0.386027	['BCL2L11', 'GSN', 'BAD', 'TRAF2', 'BBC3']	Reactome Pathways	0.413383	upregulated
Mitochondrial translation Homo sapiens R-HSA-5368287	1.34691	1.26263	0.691522	0.391633	['MRPL52', 'AURKAIP1', 'MRPL54']	Reactome Pathways	0.40712	upregulated
Mitochondrial protein import Homo sapiens R-HSA-1268020	1.50201	1.40476	0.691522	0.392485	['TIMM8B', 'TOMM7']	Reactome Pathways	0.406176	upregulated
Syndecan interactions Homo sapiens R-HSA-3000170	2.05474	1.89584	0.692525	0.397459	['SDC1']	Reactome Pathways	0.400708	upregulated
eNOS activation and regulation Homo sapiens R-HSA-203765	2.05474	1.89584	0.692525	0.397459	['GCHFR']	Reactome Pathways	0.400708	upregulated
Metabolism of nitric oxide Homo sapiens R-HSA-202131	2.05474	1.89584	0.692525	0.397459	['GCHFR']	Reactome Pathways	0.400708	upregulated
Synthesis of PC Homo sapiens R-HSA-1483191	2.05474	1.89584	0.692525	0.397459	['LPIN3']	Reactome Pathways	0.400708	upregulated
Programmed Cell Death Homo sapiens R-HSA-5357801	1.21331	1.10901	0.696599	0.400904	['BCL2L11', 'GSN', 'BAD', 'TRAF2', 'BBC3']	Reactome Pathways	0.396959	upregulated
Phase 1 - Functionalization of compounds Homo sapiens R-HSA-211945	1.31651	1.18952	0.702004	0.405131	['RXRA', 'ALDH2', 'EPHX1']	Reactome Pathways	0.392404	upregulated
Aflatoxin activation and detoxification Homo sapiens R-HSA-5423646	1.9519	1.72827	0.708978	0.412537	['AKR7A2']	Reactome Pathways	0.384537	upregulated
TP53 regulates transcription of additional cell cycle genes whose exact role in the p53 pathway remain uncertain Homo sapiens R-HSA-6804115	1.9519	1.72827	0.708978	0.412537	['BTG2']	Reactome Pathways	0.384537	upregulated
Signal transduction by L1 Homo sapiens R-HSA-445144	1.9519	1.72827	0.708978	0.412537	['MAP2K2']	Reactome Pathways	0.384537	upregulated
Pre-NOTCH Expression and Processing Homo sapiens R-HSA-1912422	1.41986	1.23578	0.717788	0.418805	['ATP2A1', 'RFNG']	Reactome Pathways	0.377988	upregulated
TNFR2 non-canonical NF-kB pathway Homo sapiens R-HSA-5668541	1.27338	1.08897	0.724349	0.425207	['CD27', 'TRAF2', 'TNFRSF14']	Reactome Pathways	0.371399	upregulated
Pink/Parkin Mediated Mitophagy Homo sapiens R-HSA-5205685	1.85886	1.5808	0.724349	0.427239	['TOMM7']	Reactome Pathways	0.369329	upregulated
Mitophagy Homo sapiens R-HSA-5205647	1.85886	1.5808	0.724349	0.427239	['TOMM7']	Reactome Pathways	0.369329	upregulated
SALM protein interactions at the synapse Homo sapiens R-HSA-8849932	1.85886	1.5808	0.724349	0.427239	['FLOT2']	Reactome Pathways	0.369329	upregulated
Organelle biogenesis and maintenance Homo sapiens R-HSA-1852241	1.10922	0.939299	0.724657	0.428781	['HELZ2', 'MRPL52', 'ESRRA', 'RXRA', 'B9D1', 'B9D2', 'AURKAIP1', 'POLRMT', 'MRPL54']	Reactome Pathways	0.367764	upregulated
Post-translational protein modification Homo sapiens R-HSA-597592	1.07914	0.911451	0.724657	0.429725	['SPON2', 'PMM1', 'PIGQ', 'ALG3', 'MOGS', 'TRAPPC9', 'ARFGAP1', 'AMDHD2', 'COL7A1', 'NEU1', 'PREB', 'MAN1B1', 'NUDT14', 'ARF5']	Reactome Pathways	0.366809	upregulated
mRNA Splicing - Major Pathway Homo sapiens R-HSA-72163	1.20161	1.00885	0.726364	0.431892	['CD2BP2', 'POLR2F', 'POLR2J', 'POLR2L']	Reactome Pathways	0.364625	upregulated
Visual phototransduction Homo sapiens R-HSA-2187338	1.24616	1.02744	0.735444	0.43846	['GPC1', 'SDC1', 'PLB1']	Reactome Pathways	0.35807	upregulated
Acyl chain remodelling of PE Homo sapiens R-HSA-1482839	1.77428	1.45031	0.736737	0.441574	['LPCAT3']	Reactome Pathways	0.354997	upregulated
RAF-independent MAPK1/3 activation Homo sapiens R-HSA-112409	1.77428	1.45031	0.736737	0.441574	['MAP2K2']	Reactome Pathways	0.354997	upregulated
HDACs deacetylate histones Homo sapiens R-HSA-3214815	1.34621	1.09142	0.739711	0.444532	['HMG20B', 'SAP30']	Reactome Pathways	0.352097	upregulated
Endogenous sterols Homo sapiens R-HSA-211976	1.69705	1.3343	0.750108	0.455551	['RXRA']	Reactome Pathways	0.341463	upregulated
TRAF6 mediated NF-kB activation Homo sapiens R-HSA-933542	1.69705	1.3343	0.750108	0.455551	['TRAF2']	Reactome Pathways	0.341463	upregulated
Synthesis of bile acids and bile salts via 7alpha-hydroxycholesterol Homo sapiens R-HSA-193368	1.69705	1.3343	0.750108	0.455551	['RXRA']	Reactome Pathways	0.341463	upregulated
Glutamate Neurotransmitter Release Cycle Homo sapiens R-HSA-210500	1.69705	1.3343	0.750108	0.455551	['RIMS1']	Reactome Pathways	0.341463	upregulated
Autodegradation of Cdh1 by Cdh1:APC/C Homo sapiens R-HSA-174084	1.3012	1.00667	0.7567	0.461328	['ANAPC2', 'ANAPC11']	Reactome Pathways	0.33599	upregulated
Gene Silencing by RNA Homo sapiens R-HSA-211000	1.19505	0.916087	0.7567	0.464604	['POLR2F', 'POLR2J', 'POLR2L']	Reactome Pathways	0.332917	upregulated
Amino acid synthesis and interconversion (transamination) Homo sapiens R-HSA-70614	1.62625	1.2307	0.7567	0.469178	['GPT']	Reactome Pathways	0.328662	upregulated
Post-translational modification: synthesis of GPI-anchored proteins Homo sapiens R-HSA-163125	1.62625	1.2307	0.7567	0.469178	['PIGQ']	Reactome Pathways	0.328662	upregulated
ATF4 activates genes Homo sapiens R-HSA-380994	1.62625	1.2307	0.7567	0.469178	['EXOSC4']	Reactome Pathways	0.328662	upregulated
Constitutive Signaling by AKT1 E17K in Cancer Homo sapiens R-HSA-5674400	1.62625	1.2307	0.7567	0.469178	['BAD']	Reactome Pathways	0.328662	upregulated
Regulation of IFNA signaling Homo sapiens R-HSA-912694	1.62625	1.2307	0.7567	0.469178	['STAT2']	Reactome Pathways	0.328662	upregulated
RAF activation Homo sapiens R-HSA-5673000	1.62625	1.2307	0.7567	0.469178	['MAP2K2']	Reactome Pathways	0.328662	upregulated
HDR through Homologous Recombination (HRR) Homo sapiens R-HSA-5685942	1.2591	0.929865	0.768672	0.477823	['MUS81', 'SLX1A']	Reactome Pathways	0.320733	upregulated
HIV Infection Homo sapiens R-HSA-162906	1.08435	0.792893	0.77023	0.481323	['CTDP1', 'VPS37D', 'POLR2F', 'POLR2J', 'VPS28', 'POLR2L']	Reactome Pathways	0.317564	upregulated
Insulin receptor recycling Homo sapiens R-HSA-77387	1.56112	1.13782	0.77023	0.482465	['ATP6AP1']	Reactome Pathways	0.316534	upregulated
Downregulation of TGF-beta receptor signaling Homo sapiens R-HSA-2173788	1.56112	1.13782	0.77023	0.482465	['BAMBI']	Reactome Pathways	0.316534	upregulated
APC/C:Cdc20 mediated degradation of Securin Homo sapiens R-HSA-174154	1.21963	0.860091	0.776872	0.494006	['ANAPC2', 'ANAPC11']	Reactome Pathways	0.306268	upregulated
Class I MHC mediated antigen processing & presentation Homo sapiens R-HSA-983169	1.05133	0.738411	0.776872	0.495414	['FBXL8', 'TRIM9', 'RNF126', 'TRIM41', 'ASB6', 'RBCK1', 'ANAPC11', 'ANAPC2']	Reactome Pathways	0.305032	upregulated
Caspase activation via extrinsic apoptotic signalig pathway Homo sapiens R-HSA-5357769	1.501	1.05423	0.776872	0.495421	['TRAF2']	Reactome Pathways	0.305026	upregulated
Effects of PIP2 hydrolysis Homo sapiens R-HSA-114508	1.501	1.05423	0.776872	0.495421	['ABHD12']	Reactome Pathways	0.305026	upregulated
Synthesis of bile acids and bile salts Homo sapiens R-HSA-192105	1.501	1.05423	0.776872	0.495421	['RXRA']	Reactome Pathways	0.305026	upregulated
Peroxisomal lipid metabolism Homo sapiens R-HSA-390918	1.501	1.05423	0.776872	0.495421	['ACAA1']	Reactome Pathways	0.305026	upregulated
Pyruvate metabolism Homo sapiens R-HSA-70268	1.501	1.05423	0.776872	0.495421	['RXRA']	Reactome Pathways	0.305026	upregulated
Degradation of the extracellular matrix Homo sapiens R-HSA-1474228	1.13674	0.7959	0.776872	0.496507	['COL18A1', 'LAMB3', 'MMP15']	Reactome Pathways	0.304075	upregulated
Macroautophagy Homo sapiens R-HSA-1632852	1.2008	0.827593	0.781545	0.501978	['LAMTOR2', 'LAMTOR4']	Reactome Pathways	0.299316	upregulated
Integrin cell surface interactions Homo sapiens R-HSA-216083	1.2008	0.827593	0.781545	0.501978	['COL18A1', 'COL4A1']	Reactome Pathways	0.299316	upregulated
PERK regulates gene expression Homo sapiens R-HSA-381042	1.44534	0.97874	0.788573	0.508052	['EXOSC4']	Reactome Pathways	0.294092	upregulated
Nucleotide Excision Repair Homo sapiens R-HSA-5696398	1.11498	0.752953	0.788573	0.508999	['POLR2F', 'POLR2J', 'POLR2L']	Reactome Pathways	0.293283	upregulated
Transferrin endocytosis and recycling Homo sapiens R-HSA-917977	1.39364	0.910355	0.804205	0.520368	['ATP6AP1']	Reactome Pathways	0.283689	upregulated
APC/C:Cdh1 mediated degradation of Cdc20 and other APC/C:Cdh1 targeted proteins in late mitosis/early G1 Homo sapiens R-HSA-174178	1.13096	0.71155	0.817763	0.533041	['ANAPC2', 'ANAPC11']	Reactome Pathways	0.273239	upregulated
Cdc20:Phospho-APC/C mediated degradation of Cyclin A Homo sapiens R-HSA-174184	1.13096	0.71155	0.817763	0.533041	['ANAPC2', 'ANAPC11']	Reactome Pathways	0.273239	upregulated
Lipid digestion, mobilization, and transport Homo sapiens R-HSA-73923	1.13096	0.71155	0.817763	0.533041	['SDC1', 'PLTP']	Reactome Pathways	0.273239	upregulated
Signaling by NOTCH1 Homo sapiens R-HSA-1980143	1.11474	0.685657	0.82533	0.540598	['TLE4', 'HDAC11']	Reactome Pathways	0.267126	upregulated
APC:Cdc20 mediated degradation of cell cycle proteins prior to satisfation of the cell cycle checkpoint Homo sapiens R-HSA-179419	1.11474	0.685657	0.82533	0.540598	['ANAPC2', 'ANAPC11']	Reactome Pathways	0.267126	upregulated
Signaling by TGF-beta Receptor Complex Homo sapiens R-HSA-170834	1.09899	0.660881	0.83471	0.548069	['BAMBI', 'MEN1']	Reactome Pathways	0.261165	upregulated
APC/C:Cdc20 mediated degradation of mitotic proteins Homo sapiens R-HSA-176409	1.08367	0.637163	0.835908	0.555455	['ANAPC2', 'ANAPC11']	Reactome Pathways	0.255351	upregulated
TRAF6 mediated IRF7 activation Homo sapiens R-HSA-933541	1.25858	0.739904	0.835908	0.5555	['TRAF2']	Reactome Pathways	0.255316	upregulated
SMAD2/SMAD3:SMAD4 heterotrimer regulates transcription Homo sapiens R-HSA-2173796	1.25858	0.739904	0.835908	0.5555	['MEN1']	Reactome Pathways	0.255316	upregulated
TGF-beta receptor signaling activates SMADs Homo sapiens R-HSA-2173789	1.25858	0.739904	0.835908	0.5555	['BAMBI']	Reactome Pathways	0.255316	upregulated
Signaling by Robo receptor Homo sapiens R-HSA-376176	1.25858	0.739904	0.835908	0.5555	['GPC1']	Reactome Pathways	0.255316	upregulated
Activation of APC/C and APC/C:Cdc20 mediated degradation of mitotic proteins Homo sapiens R-HSA-176814	1.06877	0.614448	0.842578	0.562754	['ANAPC2', 'ANAPC11']	Reactome Pathways	0.249681	upregulated
Smooth Muscle Contraction Homo sapiens R-HSA-445355	1.21919	0.692558	0.842578	0.56663	['MYL6B']	Reactome Pathways	0.2467	upregulated
Sialic acid metabolism Homo sapiens R-HSA-4085001	1.21919	0.692558	0.842578	0.56663	['NEU1']	Reactome Pathways	0.2467	upregulated
E2F mediated regulation of DNA replication Homo sapiens R-HSA-113510	1.21919	0.692558	0.842578	0.56663	['TK2']	Reactome Pathways	0.2467	upregulated
Detoxification of Reactive Oxygen Species Homo sapiens R-HSA-3299685	1.21919	0.692558	0.842578	0.56663	['PRDX5']	Reactome Pathways	0.2467	upregulated
Senescence-Associated Secretory Phenotype (SASP) Homo sapiens R-HSA-2559582	1.04016	0.571827	0.854674	0.577095	['ANAPC2', 'ANAPC11']	Reactome Pathways	0.238753	upregulated
Negative regulators of RIG-I/MDA5 signaling Homo sapiens R-HSA-936440	1.18218	0.64911	0.854674	0.577482	['RNF125']	Reactome Pathways	0.238461	upregulated
COPI-mediated anterograde transport Homo sapiens R-HSA-6807878	1.02642	0.551828	0.862218	0.584135	['ARFGAP1', 'ARF5']	Reactome Pathways	0.233487	upregulated
SIRT1 negatively regulates rRNA Expression Homo sapiens R-HSA-427359	1.14735	0.609154	0.862218	0.588063	['TAF1C']	Reactome Pathways	0.230576	upregulated
Bile acid and bile salt metabolism Homo sapiens R-HSA-194068	1.14735	0.609154	0.862218	0.588063	['RXRA']	Reactome Pathways	0.230576	upregulated
Lysosome Vesicle Biogenesis Homo sapiens R-HSA-432720	1.14735	0.609154	0.862218	0.588063	['BLOC1S1']	Reactome Pathways	0.230576	upregulated
RIG-I/MDA5 mediated induction of IFN-alpha/beta pathways Homo sapiens R-HSA-168928	1.01304	0.532645	0.862633	0.591089	['RNF125', 'TRAF2']	Reactome Pathways	0.228347	upregulated
Regulation of APC/C activators between G1/S and early anaphase Homo sapiens R-HSA-176408	1.01304	0.532645	0.862633	0.591089	['ANAPC2', 'ANAPC11']	Reactome Pathways	0.228347	upregulated
RHO GTPases Activate WASPs and WAVEs Homo sapiens R-HSA-5663213	1.11451	0.572337	0.871252	0.59838	['ARPC4']	Reactome Pathways	0.223023	upregulated
COPI-dependent Golgi-to-ER retrograde traffic Homo sapiens R-HSA-6811434	0.987291	0.496573	0.875761	0.604735	['ARFGAP1', 'ARF5']	Reactome Pathways	0.218435	upregulated
Membrane Trafficking Homo sapiens R-HSA-199991	0.950224	0.474418	0.875761	0.606974	['VPS51', 'BLOC1S1', 'COL7A1', 'VPS37D', 'PREB', 'TRAPPC9', 'VPS28', 'ARF5', 'ARFGAP1', 'STX10']	Reactome Pathways	0.21683	upregulated
Defective B3GALTL causes Peters-plus syndrome (PpS) Homo sapiens R-HSA-5083635	1.0835	0.538348	0.875761	0.608438	['SPON2']	Reactome Pathways	0.215784	upregulated
NCAM1 interactions Homo sapiens R-HSA-419037	1.0835	0.538348	0.875761	0.608438	['COL4A1']	Reactome Pathways	0.215784	upregulated
Apoptotic cleavage of cellular proteins Homo sapiens R-HSA-111465	1.0835	0.538348	0.875761	0.608438	['GSN']	Reactome Pathways	0.215784	upregulated
O-glycosylation of TSR domain-containing proteins Homo sapiens R-HSA-5173214	1.05416	0.506915	0.885823	0.618245	['SPON2']	Reactome Pathways	0.208839	upregulated
Transport of vitamins, nucleosides, and related molecules Homo sapiens R-HSA-425397	1.05416	0.506915	0.885823	0.618245	['SLC29A3']	Reactome Pathways	0.208839	upregulated
Association of TriC/CCT with target proteins during biosynthesis Homo sapiens R-HSA-390471	1.02637	0.477797	0.893418	0.627807	['FBXW5']	Reactome Pathways	0.202174	upregulated
Nuclear signaling by ERBB4 Homo sapiens R-HSA-1251985	1.02637	0.477797	0.893418	0.627807	['WWOX']	Reactome Pathways	0.202174	upregulated
NS1 Mediated Effects on Host Pathways Homo sapiens R-HSA-168276	1.02637	0.477797	0.893418	0.627807	['CPSF4']	Reactome Pathways	0.202174	upregulated
APC/C-mediated degradation of cell cycle proteins Homo sapiens R-HSA-174143	0.939517	0.432622	0.893896	0.630986	['ANAPC2', 'ANAPC11']	Reactome Pathways	0.199981	upregulated
Regulation of mitotic cell cycle Homo sapiens R-HSA-453276	0.939517	0.432622	0.893896	0.630986	['ANAPC2', 'ANAPC11']	Reactome Pathways	0.199981	upregulated
Negative regulation of MAPK pathway Homo sapiens R-HSA-5675221	1	0.450781	0.898839	0.63713	['MAP2K2']	Reactome Pathways	0.195772	upregulated
Cell junction organization Homo sapiens R-HSA-446728	0.928285	0.418159	0.898839	0.637332	['LAMB3', 'TESK1']	Reactome Pathways	0.195634	upregulated
Platelet homeostasis Homo sapiens R-HSA-418346	0.917316	0.404251	0.903272	0.643593	['P2RX6', 'ATP2A1']	Reactome Pathways	0.191389	upregulated
Glycosphingolipid metabolism Homo sapiens R-HSA-1660662	0.97495	0.425678	0.903272	0.64622	['NEU1']	Reactome Pathways	0.18962	upregulated
Histidine, lysine, phenylalanine, tyrosine, proline and tryptophan catabolism Homo sapiens R-HSA-6788656	0.97495	0.425678	0.903272	0.64622	['ALDH4A1']	Reactome Pathways	0.18962	upregulated
Host Interactions with Influenza Factors Homo sapiens R-HSA-168253	0.97495	0.425678	0.903272	0.64622	['CPSF4']	Reactome Pathways	0.18962	upregulated
Signaling by Retinoic Acid Homo sapiens R-HSA-5362517	0.951122	0.402318	0.911609	0.655083	['RXRA']	Reactome Pathways	0.183704	upregulated
EPHB-mediated forward signaling Homo sapiens R-HSA-3928662	0.951122	0.402318	0.911609	0.655083	['ARPC4']	Reactome Pathways	0.183704	upregulated
Intra-Golgi and retrograde Golgi-to-ER traffic Homo sapiens R-HSA-6811442	0.890553	0.373057	0.913323	0.657766	['VPS51', 'ARFGAP1', 'ARF5', 'STX10']	Reactome Pathways	0.181928	upregulated
Iron uptake and transport Homo sapiens R-HSA-917937	0.928428	0.380553	0.919565	0.663724	['ATP6AP1']	Reactome Pathways	0.178013	upregulated
Transcriptional activity of SMAD2/SMAD3:SMAD4 heterotrimer Homo sapiens R-HSA-2173793	0.90679	0.360246	0.92919	0.672149	['MEN1']	Reactome Pathways	0.172535	upregulated
Interferon gamma signaling Homo sapiens R-HSA-877300	0.856569	0.331136	0.932349	0.679374	['GBP2', 'OASL']	Reactome Pathways	0.167891	upregulated
ABC-family proteins mediated transport Homo sapiens R-HSA-382556	0.886136	0.341276	0.932349	0.680363	['ABCC10']	Reactome Pathways	0.167259	upregulated
Diseases of metabolism Homo sapiens R-HSA-5668914	0.886136	0.341276	0.932349	0.680363	['PC']	Reactome Pathways	0.167259	upregulated
RMTs methylate histone arginines Homo sapiens R-HSA-3214858	0.886136	0.341276	0.932349	0.680363	['COPRS']	Reactome Pathways	0.167259	upregulated
Vesicle-mediated transport Homo sapiens R-HSA-5653656	0.88946	0.331126	0.942356	0.689163	['VPS51', 'BLOC1S1', 'COL4A1', 'COL7A1', 'VPS37D', 'PREB', 'TRAPPC9', 'VPS28', 'ARF5', 'ARFGAP1', 'STX10']	Reactome Pathways	0.161678	upregulated
Anchoring of the basal body to the plasma membrane Homo sapiens R-HSA-5620912	0.820334	0.290763	0.956126	0.701563	['B9D1', 'B9D2']	Reactome Pathways	0.153933	upregulated
Pyruvate metabolism and Citric Acid (TCA) cycle Homo sapiens R-HSA-71406	0.829446	0.291359	0.956126	0.703794	['RXRA']	Reactome Pathways	0.152554	upregulated
TP53 Regulates Transcription of Cell Cycle Genes Homo sapiens R-HSA-6791312	0.829446	0.291359	0.956126	0.703794	['BTG2']	Reactome Pathways	0.152554	upregulated
DNA Double-Strand Break Repair Homo sapiens R-HSA-5693532	0.822881	0.28615	0.956225	0.706281	['MUS81', 'SLX1A', 'POLL']	Reactome Pathways	0.151022	upregulated
Metabolism of water-soluble vitamins and cofactors Homo sapiens R-HSA-196849	0.811747	0.281559	0.956225	0.706907	['PC', 'NADSYN1']	Reactome Pathways	0.150638	upregulated
Extracellular matrix organization Homo sapiens R-HSA-1474244	0.84288	0.284071	0.9636	0.713892	['COL18A1', 'LAMB3', 'MMP15', 'COL4A1', 'COL7A1', 'SDC1']	Reactome Pathways	0.146368	upregulated
Stimuli-sensing channels Homo sapiens R-HSA-2672351	0.795099	0.264118	0.965615	0.717356	['SCNN1D', 'BEST1']	Reactome Pathways	0.144265	upregulated
Deadenylation-dependent mRNA decay Homo sapiens R-HSA-429914	0.795509	0.263038	0.965615	0.718454	['EXOSC4']	Reactome Pathways	0.143601	upregulated
DNA Repair Homo sapiens R-HSA-73894	0.836751	0.274698	0.965835	0.720154	['MUS81', 'POLR2F', 'SLX1A', 'POLL', 'POLR2J', 'POLR2L']	Reactome Pathways	0.142575	upregulated
Nuclear Envelope Breakdown Homo sapiens R-HSA-2980766	0.779559	0.250145	0.966835	0.72551	['LPIN3']	Reactome Pathways	0.139356	upregulated
Apoptotic execution phase Homo sapiens R-HSA-75153	0.779559	0.250145	0.966835	0.72551	['GSN']	Reactome Pathways	0.139356	upregulated
Ion homeostasis Homo sapiens R-HSA-5578775	0.779559	0.250145	0.966835	0.72551	['ATP2A1']	Reactome Pathways	0.139356	upregulated
Nonhomologous End-Joining (NHEJ) Homo sapiens R-HSA-5693571	0.764234	0.238015	0.97394	0.73239	['POLL']	Reactome Pathways	0.135257	upregulated
Platelet degranulation Homo sapiens R-HSA-114608	0.756307	0.225571	0.984788	0.742113	['ITIH4', 'VEGFB']	Reactome Pathways	0.12953	upregulated
Golgi Associated Vesicle Biogenesis Homo sapiens R-HSA-432722	0.73532	0.215828	0.987381	0.745638	['BLOC1S1']	Reactome Pathways	0.127472	upregulated
Ion channel transport Homo sapiens R-HSA-983712	0.782177	0.224654	0.991533	0.750349	['SCNN1D', 'ATP6AP1', 'ATP2A1', 'BEST1']	Reactome Pathways	0.124737	upregulated
Ion transport by P-type ATPases Homo sapiens R-HSA-936837	0.721666	0.205675	0.991649	0.752014	['ATP2A1']	Reactome Pathways	0.123774	upregulated
Constitutive Signaling by NOTCH1 PEST Domain Mutants Homo sapiens R-HSA-2644606	0.69582	0.18704	0.994175	0.764292	['HDAC11']	Reactome Pathways	0.116741	upregulated
Signaling by NOTCH1 PEST Domain Mutants in Cancer Homo sapiens R-HSA-2644602	0.69582	0.18704	0.994175	0.764292	['HDAC11']	Reactome Pathways	0.116741	upregulated
Signaling by NOTCH1 in Cancer Homo sapiens R-HSA-2644603	0.69582	0.18704	0.994175	0.764292	['HDAC11']	Reactome Pathways	0.116741	upregulated
Constitutive Signaling by NOTCH1 HD+PEST Domain Mutants Homo sapiens R-HSA-2894862	0.69582	0.18704	0.994175	0.764292	['HDAC11']	Reactome Pathways	0.116741	upregulated
Signaling by NOTCH1 HD+PEST Domain Mutants in Cancer Homo sapiens R-HSA-2894858	0.69582	0.18704	0.994175	0.764292	['HDAC11']	Reactome Pathways	0.116741	upregulated
Golgi-to-ER retrograde transport Homo sapiens R-HSA-8856688	0.721107	0.193176	0.994175	0.764993	['ARFGAP1', 'ARF5']	Reactome Pathways	0.116342	upregulated
Response to elevated platelet cytosolic Ca2+ Homo sapiens R-HSA-76005	0.721107	0.193176	0.994175	0.764993	['ITIH4', 'VEGFB']	Reactome Pathways	0.116342	upregulated
Neuronal System Homo sapiens R-HSA-112316	0.790709	0.20994	0.994489	0.766816	['PANX2', 'RIMS1', 'ALDH2', 'CACFD1', 'FLOT2', 'LIN7B']	Reactome Pathways	0.115309	upregulated
HDR through Homologous Recombination (HR) or Single Strand Annealing (SSA) Homo sapiens R-HSA-5693567	0.707923	0.181687	0.999699	0.773641	['MUS81', 'SLX1A']	Reactome Pathways	0.111461	upregulated
Separation of Sister Chromatids Homo sapiens R-HSA-2467813	0.734255	0.188092	0.999699	0.774012	['B9D2', 'ANAPC2', 'ANAPC11']	Reactome Pathways	0.111252	upregulated
Transmission across Chemical Synapses Homo sapiens R-HSA-112315	0.751636	0.19006	0.999996	0.776575	['RIMS1', 'ALDH2', 'CACFD1', 'LIN7B']	Reactome Pathways	0.109816	upregulated
PI Metabolism Homo sapiens R-HSA-1483255	0.660338	0.162732	0.999996	0.78158	['PNPLA6']	Reactome Pathways	0.107026	upregulated
Diseases associated with O-glycosylation of proteins Homo sapiens R-HSA-3906995	0.638622	0.148603	0.999996	0.792397	['SPON2']	Reactome Pathways	0.101057	upregulated
Cytochrome P450 - arranged by substrate type Homo sapiens R-HSA-211897	0.638622	0.148603	0.999996	0.792397	['RXRA']	Reactome Pathways	0.101057	upregulated
Homology Directed Repair Homo sapiens R-HSA-5693538	0.671098	0.151485	0.999996	0.797936	['MUS81', 'SLX1A']	Reactome Pathways	0.0980322	upregulated
Mitotic Anaphase Homo sapiens R-HSA-68882	0.686353	0.144097	0.999996	0.810628	['B9D2', 'ANAPC2', 'ANAPC11']	Reactome Pathways	0.0911785	upregulated
Mitotic Metaphase and Anaphase Homo sapiens R-HSA-2555396	0.682304	0.140671	0.999996	0.813694	['B9D2', 'ANAPC2', 'ANAPC11']	Reactome Pathways	0.0895386	upregulated
Signaling by PTK6 Homo sapiens R-HSA-8848021	0.590089	0.119153	0.999996	0.817157	['STAP2']	Reactome Pathways	0.0876945	upregulated
Semaphorin interactions Homo sapiens R-HSA-373755	0.590089	0.119153	0.999996	0.817157	['PLXNB3']	Reactome Pathways	0.0876945	upregulated
Amyloid fiber formation Homo sapiens R-HSA-977225	0.581252	0.114115	0.999996	0.821743	['GSN']	Reactome Pathways	0.0852637	upregulated
trans-Golgi Network Vesicle Budding Homo sapiens R-HSA-199992	0.564346	0.104764	0.999996	0.830575	['BLOC1S1']	Reactome Pathways	0.0806213	upregulated
Clathrin derived vesicle budding Homo sapiens R-HSA-421837	0.564346	0.104764	0.999996	0.830575	['BLOC1S1']	Reactome Pathways	0.0806213	upregulated
Costimulation by the CD28 family Homo sapiens R-HSA-388841	0.548393	0.0962875	0.999996	0.838969	['TNFRSF14']	Reactome Pathways	0.076254	upregulated
Cell-Cell communication Homo sapiens R-HSA-1500931	0.603063	0.103144	0.999996	0.842793	['LAMB3', 'TESK1']	Reactome Pathways	0.074279	upregulated
Sphingolipid metabolism Homo sapiens R-HSA-428157	0.533313	0.0885915	0.999996	0.846949	['NEU1']	Reactome Pathways	0.072143	upregulated
Binding and Uptake of Ligands by Scavenger Receptors Homo sapiens R-HSA-2173782	0.533313	0.0885915	0.999996	0.846949	['COL4A1']	Reactome Pathways	0.072143	upregulated
Diseases of signal transduction Homo sapiens R-HSA-5663202	0.685905	0.111655	0.999996	0.849774	['BAD', 'HDAC11', 'POLR2F', 'POLR2J', 'POLR2L']	Reactome Pathways	0.0706965	upregulated
Regulation of HSF1-mediated heat shock response Homo sapiens R-HSA-3371453	0.492656	0.0694041	0.999996	0.868596	['RPS19BP1']	Reactome Pathways	0.0611823	upregulated
Interferon Signaling Homo sapiens R-HSA-913531	0.603841	0.0832681	0.999996	0.871188	['STAT2', 'GBP2', 'OASL']	Reactome Pathways	0.0598881	upregulated
Degradation of beta-catenin by the destruction complex Homo sapiens R-HSA-195253	0.480442	0.0640939	0.999996	0.87511	['TLE4']	Reactome Pathways	0.0579375	upregulated
TCF dependent signaling in response to WNT Homo sapiens R-HSA-201681	0.594506	0.0775691	0.999996	0.877677	['TLE4', 'PYGO2', 'MEN1']	Reactome Pathways	0.0566653	upregulated
RHO GTPase Effectors Homo sapiens R-HSA-195258	0.618462	0.0762943	0.999996	0.883944	['ARPC4', 'B9D2', 'LIN7B', 'MEN1']	Reactome Pathways	0.0535752	upregulated
PI3K/AKT Signaling in Cancer Homo sapiens R-HSA-2219528	0.457739	0.0547914	0.999996	0.887186	['BAD']	Reactome Pathways	0.0519851	upregulated
Regulation of mRNA stability by proteins that bind AU-rich elements Homo sapiens R-HSA-450531	0.457739	0.0547914	0.999996	0.887186	['EXOSC4']	Reactome Pathways	0.0519851	upregulated
Signaling by FGFR2 Homo sapiens R-HSA-5654738	0.655015	0.0755784	0.999996	0.891024	['MAP2K2', 'BAD', 'POLR2F', 'LAMTOR2', 'POLR2J', 'POLR2L']	Reactome Pathways	0.0501108	upregulated
Signaling by Insulin receptor Homo sapiens R-HSA-74752	0.633591	0.0726704	0.999996	0.891637	['STK11', 'MAP2K2', 'ATP6AP1', 'LAMTOR2', 'LAMTOR4']	Reactome Pathways	0.0498119	upregulated
Regulation of TP53 Activity through Phosphorylation Homo sapiens R-HSA-6804756	0.442066	0.0488056	0.999996	0.895473	['STK11']	Reactome Pathways	0.0479477	upregulated
Signaling by FGFR Homo sapiens R-HSA-190236	0.645749	0.0693168	0.999996	0.898217	['MAP2K2', 'BAD', 'POLR2F', 'LAMTOR2', 'POLR2J', 'POLR2L']	Reactome Pathways	0.0466186	upregulated
Cellular responses to stress Homo sapiens R-HSA-2262752	0.643927	0.0681262	0.999996	0.899606	['PRDX5', 'RPS19BP1', 'LAMTOR2', 'LAMTOR4', 'ANAPC11', 'ANAPC2']	Reactome Pathways	0.0459475	upregulated
MAPK6/MAPK4 signaling Homo sapiens R-HSA-5687128	0.427426	0.0435398	0.999996	0.903151	['CDC42EP5']	Reactome Pathways	0.0442394	upregulated
M Phase Homo sapiens R-HSA-68886	0.58761	0.0582863	0.999996	0.905569	['B9D2', 'LPIN3', 'ANAPC11', 'ANAPC2']	Reactome Pathways	0.0430786	upregulated
EPH-Ephrin signaling Homo sapiens R-HSA-2682334	0.413721	0.0388969	0.999996	0.910267	['ARPC4']	Reactome Pathways	0.0408311	upregulated
Chaperonin-mediated protein folding Homo sapiens R-HSA-390466	0.413721	0.0388969	0.999996	0.910267	['FBXW5']	Reactome Pathways	0.0408311	upregulated
L1CAM interactions Homo sapiens R-HSA-373760	0.409345	0.0374731	0.999996	0.912521	['MAP2K2']	Reactome Pathways	0.0397571	upregulated
Cellular response to heat stress Homo sapiens R-HSA-3371556	0.409345	0.0374731	0.999996	0.912521	['RPS19BP1']	Reactome Pathways	0.0397571	upregulated
Cellular Senescence Homo sapiens R-HSA-2559583	0.48852	0.0440245	0.999996	0.913823	['ANAPC2', 'ANAPC11']	Reactome Pathways	0.0391378	upregulated
Regulation of actin dynamics for phagocytic cup formation Homo sapiens R-HSA-2029482	0.40506	0.0361066	0.999996	0.914719	['ARPC4']	Reactome Pathways	0.0387125	upregulated
Resolution of Sister Chromatid Cohesion Homo sapiens R-HSA-2500257	0.396753	0.0335351	0.999996	0.91895	['B9D2']	Reactome Pathways	0.0367083	upregulated
Transport of inorganic cations/anions and amino acids/oligopeptides Homo sapiens R-HSA-425393	0.396753	0.0335351	0.999996	0.91895	['SLC12A7']	Reactome Pathways	0.0367083	upregulated
Transport of glucose and other sugars, bile salts and organic acids, metal ions and amine compounds Homo sapiens R-HSA-425366	0.388778	0.0311634	0.999996	0.922971	['SLC2A6']	Reactome Pathways	0.0348119	upregulated
Protein folding Homo sapiens R-HSA-391251	0.388778	0.0311634	0.999996	0.922971	['FBXW5']	Reactome Pathways	0.0348119	upregulated
Chromatin organization Homo sapiens R-HSA-4839726	0.521794	0.0411483	0.999996	0.92417	['COPRS', 'HMG20B', 'SAP30']	Reactome Pathways	0.0342481	upregulated
Chromatin modifying enzymes Homo sapiens R-HSA-3247509	0.521794	0.0411483	0.999996	0.92417	['COPRS', 'HMG20B', 'SAP30']	Reactome Pathways	0.0342481	upregulated
MHC class II antigen presentation Homo sapiens R-HSA-2132295	0.381115	0.0289741	0.999996	0.926793	['CTSF']	Reactome Pathways	0.033017	upregulated
IRS-mediated signalling Homo sapiens R-HSA-112399	0.553571	0.0418196	0.999996	0.927238	['STK11', 'MAP2K2', 'LAMTOR2', 'LAMTOR4']	Reactome Pathways	0.0328088	upregulated
Developmental Biology Homo sapiens R-HSA-1266738	0.698821	0.0504988	0.999996	0.930286	['MAP2K2', 'CEBPD', 'ARPC4', 'ACVR1B', 'HELZ2', 'RXRA', 'COL4A1', 'GPC1', 'PLXNB3', 'POLR2F', 'LAMTOR2', 'HOXD3', 'POLR2J', 'POLR2L']	Reactome Pathways	0.0313834	upregulated
Insulin receptor signalling cascade Homo sapiens R-HSA-74751	0.547618	0.0392913	0.999996	0.930764	['STK11', 'MAP2K2', 'LAMTOR2', 'LAMTOR4']	Reactome Pathways	0.0311604	upregulated
IGF1R signaling cascade Homo sapiens R-HSA-2428924	0.545661	0.0384826	0.999996	0.931905	['STK11', 'MAP2K2', 'LAMTOR2', 'LAMTOR4']	Reactome Pathways	0.0306285	upregulated
Signaling by Type 1 Insulin-like Growth Factor 1 Receptor (IGF1R) Homo sapiens R-HSA-2404192	0.545661	0.0384826	0.999996	0.931905	['STK11', 'MAP2K2', 'LAMTOR2', 'LAMTOR4']	Reactome Pathways	0.0306285	upregulated
IRS-related events triggered by IGF1R Homo sapiens R-HSA-2428928	0.545661	0.0384826	0.999996	0.931905	['STK11', 'MAP2K2', 'LAMTOR2', 'LAMTOR4']	Reactome Pathways	0.0306285	upregulated
Mitotic Prometaphase Homo sapiens R-HSA-68877	0.366658	0.0250822	0.999996	0.93388	['B9D2']	Reactome Pathways	0.0297091	upregulated
Mitotic Prophase Homo sapiens R-HSA-68875	0.366658	0.0250822	0.999996	0.93388	['LPIN3']	Reactome Pathways	0.0297091	upregulated
O-linked glycosylation Homo sapiens R-HSA-5173105	0.356511	0.022537	0.999996	0.938741	['SPON2']	Reactome Pathways	0.0274542	upregulated
Integration of energy metabolism Homo sapiens R-HSA-163685	0.356511	0.022537	0.999996	0.938741	['STK11']	Reactome Pathways	0.0274542	upregulated
G1/S Transition Homo sapiens R-HSA-69206	0.350051	0.0209965	0.999996	0.941782	['TK2']	Reactome Pathways	0.0260495	upregulated
Cell Cycle Checkpoints Homo sapiens R-HSA-69620	0.431058	0.0247302	0.999996	0.944244	['ANAPC2', 'ANAPC11']	Reactome Pathways	0.0249159	upregulated
RHO GTPases Activate Formins Homo sapiens R-HSA-5663220	0.34382	0.0195691	0.999996	0.944673	['B9D2']	Reactome Pathways	0.0247186	upregulated
Cytokine Signaling in Immune system Homo sapiens R-HSA-1280215	0.631984	0.0327106	0.999996	0.949558	['MAP2K2', 'STAT2', 'CD27', 'LAMTOR2', 'TRAF2', 'TNFRSF14', 'IFNLR1', 'GBP2', 'IL17RC', 'OASL']	Reactome Pathways	0.0224785	upregulated
Assembly of the primary cilium Homo sapiens R-HSA-5617833	0.419299	0.0215916	0.999996	0.949809	['B9D1', 'B9D2']	Reactome Pathways	0.0223638	upregulated
Fcgamma receptor (FCGR) dependent phagocytosis Homo sapiens R-HSA-2029480	0.326384	0.0158792	0.999996	0.952513	['ARPC4']	Reactome Pathways	0.0211293	upregulated
Platelet activation, signaling and aggregation Homo sapiens R-HSA-76002	0.464789	0.0219141	0.999996	0.953946	['ABHD12', 'ITIH4', 'VEGFB']	Reactome Pathways	0.0204763	upregulated
PI-3K cascade:FGFR3 Homo sapiens R-HSA-5654710	0.320956	0.0148214	0.999996	0.954871	['BAD']	Reactome Pathways	0.0200552	upregulated
PI3K events in ERBB4 signaling Homo sapiens R-HSA-1250342	0.320956	0.0148214	0.999996	0.954871	['BAD']	Reactome Pathways	0.0200552	upregulated
PIP3 activates AKT signaling Homo sapiens R-HSA-1257604	0.320956	0.0148214	0.999996	0.954871	['BAD']	Reactome Pathways	0.0200552	upregulated
PI-3K cascade:FGFR4 Homo sapiens R-HSA-5654720	0.320956	0.0148214	0.999996	0.954871	['BAD']	Reactome Pathways	0.0200552	upregulated
PI-3K cascade:FGFR2 Homo sapiens R-HSA-5654695	0.320956	0.0148214	0.999996	0.954871	['BAD']	Reactome Pathways	0.0200552	upregulated
PI-3K cascade:FGFR1 Homo sapiens R-HSA-5654689	0.320956	0.0148214	0.999996	0.954871	['BAD']	Reactome Pathways	0.0200552	upregulated
PI3K/AKT activation Homo sapiens R-HSA-198203	0.313142	0.0133735	0.999996	0.958192	['BAD']	Reactome Pathways	0.0185476	upregulated
GAB1 signalosome Homo sapiens R-HSA-180292	0.313142	0.0133735	0.999996	0.958192	['BAD']	Reactome Pathways	0.0185476	upregulated
Muscle contraction Homo sapiens R-HSA-397014	0.39966	0.0169325	0.999996	0.958518	['MYL6B', 'ATP2A1']	Reactome Pathways	0.0183999	upregulated
NCAM signaling for neurite out-growth Homo sapiens R-HSA-375165	0.441516	0.0161858	0.999996	0.964004	['MAP2K2', 'COL4A1', 'LAMTOR2']	Reactome Pathways	0.0159211	upregulated
SLC-mediated transmembrane transport Homo sapiens R-HSA-425407	0.438138	0.0154486	0.999996	0.965355	['SLC12A7', 'SLC2A6', 'SLC29A3']	Reactome Pathways	0.015313	upregulated
Signaling by ERBB4 Homo sapiens R-HSA-1236394	0.474322	0.0159824	0.999996	0.966866	['WWOX', 'MAP2K2', 'BAD', 'LAMTOR2']	Reactome Pathways	0.0146336	upregulated
Cardiac conduction Homo sapiens R-HSA-5576891	0.289624	0.0095402	0.999996	0.967597	['ATP2A1']	Reactome Pathways	0.0143056	upregulated
Mitotic G1-G1/S phases Homo sapiens R-HSA-453279	0.287464	0.00922685	0.999996	0.968412	['TK2']	Reactome Pathways	0.0139397	upregulated
Signalling by NGF Homo sapiens R-HSA-166520	0.521282	0.0155763	0.999996	0.970561	['NGFR', 'MAP2K2', 'BCL2L11', 'BAD', 'LAMTOR2', 'DNAL4']	Reactome Pathways	0.012977	upregulated
Toll-Like Receptors Cascades Homo sapiens R-HSA-168898	0.279134	0.00807819	0.999996	0.971475	['CNPY3']	Reactome Pathways	0.0125686	upregulated
Factors involved in megakaryocyte development and platelet production Homo sapiens R-HSA-983231	0.277126	0.00781531	0.999996	0.972193	['HMG20B']	Reactome Pathways	0.0122477	upregulated
MAPK family signaling cascades Homo sapiens R-HSA-5683057	0.412847	0.0106373	0.999996	0.974563	['MAP2K2', 'CDC42EP5', 'LAMTOR2']	Reactome Pathways	0.0111899	upregulated
Regulation of TP53 Activity Homo sapiens R-HSA-5633007	0.258517	0.00563133	0.999996	0.978452	['STK11']	Reactome Pathways	0.00946033	upregulated
Signaling by Wnt Homo sapiens R-HSA-195721	0.397067	0.00822784	0.999996	0.979492	['TLE4', 'PYGO2', 'MEN1']	Reactome Pathways	0.00899924	upregulated
Signaling by PDGF Homo sapiens R-HSA-186797	0.428763	0.00777583	0.999996	0.982028	['MAP2K2', 'COL4A1', 'BAD', 'LAMTOR2']	Reactome Pathways	0.00787614	upregulated
SOS-mediated signalling Homo sapiens R-HSA-112412	0.332092	0.00598505	0.999996	0.982139	['MAP2K2', 'LAMTOR2']	Reactome Pathways	0.00782696	upregulated
SHC1 events in ERBB4 signaling Homo sapiens R-HSA-1250347	0.332092	0.00598505	0.999996	0.982139	['MAP2K2', 'LAMTOR2']	Reactome Pathways	0.00782696	upregulated
GRB2 events in EGFR signaling Homo sapiens R-HSA-179812	0.332092	0.00598505	0.999996	0.982139	['MAP2K2', 'LAMTOR2']	Reactome Pathways	0.00782696	upregulated
SHC1 events in EGFR signaling Homo sapiens R-HSA-180336	0.332092	0.00598505	0.999996	0.982139	['MAP2K2', 'LAMTOR2']	Reactome Pathways	0.00782696	upregulated
RAF/MAP kinase cascade Homo sapiens R-HSA-5673001	0.332092	0.00598505	0.999996	0.982139	['MAP2K2', 'LAMTOR2']	Reactome Pathways	0.00782696	upregulated
FRS-mediated FGFR4 signaling Homo sapiens R-HSA-5654712	0.330656	0.00582878	0.999996	0.982527	['MAP2K2', 'LAMTOR2']	Reactome Pathways	0.00765572	upregulated
FRS-mediated FGFR3 signaling Homo sapiens R-HSA-5654706	0.330656	0.00582878	0.999996	0.982527	['MAP2K2', 'LAMTOR2']	Reactome Pathways	0.00765572	upregulated
FRS-mediated FGFR1 signaling Homo sapiens R-HSA-5654693	0.330656	0.00582878	0.999996	0.982527	['MAP2K2', 'LAMTOR2']	Reactome Pathways	0.00765572	upregulated
FRS-mediated FGFR2 signaling Homo sapiens R-HSA-5654700	0.330656	0.00582878	0.999996	0.982527	['MAP2K2', 'LAMTOR2']	Reactome Pathways	0.00765572	upregulated
Transmembrane transport of small molecules Homo sapiens R-HSA-382551	0.52482	0.00915064	0.999996	0.982715	['ATP6AP1', 'SCNN1D', 'ATP2A1', 'ABCC10', 'SLC12A7', 'SLC2A6', 'SLC29A3', 'BEST1']	Reactome Pathways	0.00757225	upregulated
Signaling by Rho GTPases Homo sapiens R-HSA-194315	0.425153	0.00729373	0.999996	0.982991	['ARPC4', 'B9D2', 'LIN7B', 'MEN1']	Reactome Pathways	0.00745055	upregulated
ARMS-mediated activation Homo sapiens R-HSA-170984	0.32642	0.00538429	0.999996	0.98364	['MAP2K2', 'LAMTOR2']	Reactome Pathways	0.00716369	upregulated
Signalling to p38 via RIT and RIN Homo sapiens R-HSA-187706	0.32642	0.00538429	0.999996	0.98364	['MAP2K2', 'LAMTOR2']	Reactome Pathways	0.00716369	upregulated
Role of LAT2/NTAL/LAB on calcium mobilization Homo sapiens R-HSA-2730905	0.240717	0.00394975	0.999996	0.983726	['BAD']	Reactome Pathways	0.00712601	upregulated
Frs2-mediated activation Homo sapiens R-HSA-170968	0.325031	0.00524388	0.999996	0.983996	['MAP2K2', 'LAMTOR2']	Reactome Pathways	0.00700667	upregulated
Immune System Homo sapiens R-HSA-168256	0.675225	0.0106819	0.999996	0.984305	['DDX41', 'ANAPC11', 'OASL', 'TRIM9', 'POLR2F', 'TNFRSF14', 'CTSF', 'GBP2', 'POLR2L', 'MAP2K2', 'TRIM41', 'BAD', 'STAT2', 'TREX1', 'TRAF2', 'ARPC4', 'IFNLR1', 'CNPY3', 'IL17RC', 'FBXL8', 'RNF126', 'RNF125', 'ASB6', 'CD27', 'LAMTOR2', 'RBCK1', 'ANAPC2']	Reactome Pathways	0.00687042	upregulated
MAPK1/MAPK3 signaling Homo sapiens R-HSA-5684996	0.323654	0.00510716	0.999996	0.984344	['MAP2K2', 'LAMTOR2']	Reactome Pathways	0.00685302	upregulated
Prolonged ERK activation events Homo sapiens R-HSA-169893	0.322289	0.00497404	0.999996	0.984685	['MAP2K2', 'LAMTOR2']	Reactome Pathways	0.00670267	upregulated
Adaptive Immune System Homo sapiens R-HSA-1280218	0.561593	0.00866621	0.999996	0.984687	['TRIM9', 'FBXL8', 'RNF126', 'TRIM41', 'BAD', 'ASB6', 'TNFRSF14', 'RBCK1', 'CTSF', 'ANAPC11', 'ANAPC2']	Reactome Pathways	0.0067018	upregulated
Signaling by Leptin Homo sapiens R-HSA-2586552	0.320935	0.00484443	0.999996	0.985019	['MAP2K2', 'LAMTOR2']	Reactome Pathways	0.00655556	upregulated
NGF signalling via TRKA from the plasma membrane Homo sapiens R-HSA-187037	0.416957	0.00628011	0.999996	0.985051	['MAP2K2', 'BAD', 'LAMTOR2', 'DNAL4']	Reactome Pathways	0.00654124	upregulated
Interleukin receptor SHC signaling Homo sapiens R-HSA-912526	0.318261	0.00459534	0.999996	0.985665	['MAP2K2', 'LAMTOR2']	Reactome Pathways	0.00627075	upregulated
Signalling to RAS Homo sapiens R-HSA-167044	0.31694	0.00447569	0.999996	0.985978	['MAP2K2', 'LAMTOR2']	Reactome Pathways	0.00613293	upregulated
VEGFR2 mediated cell proliferation Homo sapiens R-HSA-5218921	0.31433	0.00424574	0.999996	0.986584	['MAP2K2', 'LAMTOR2']	Reactome Pathways	0.00586612	upregulated
Interleukin-2 signaling Homo sapiens R-HSA-451927	0.309237	0.00382096	0.999996	0.98772	['MAP2K2', 'LAMTOR2']	Reactome Pathways	0.00536619	upregulated
Signalling to ERKs Homo sapiens R-HSA-187687	0.307989	0.00372164	0.999996	0.987989	['MAP2K2', 'LAMTOR2']	Reactome Pathways	0.00524788	upregulated
Signaling by SCF-KIT Homo sapiens R-HSA-1433557	0.359511	0.00407607	0.999996	0.988726	['MAP2K2', 'BAD', 'LAMTOR2']	Reactome Pathways	0.00492395	upregulated
Signaling by Interleukins Homo sapiens R-HSA-449147	0.39724	0.0042666	0.999996	0.989317	['MAP2K2', 'LAMTOR2', 'IFNLR1', 'IL17RC']	Reactome Pathways	0.00466459	upregulated
Signaling by VEGF Homo sapiens R-HSA-194138	0.356137	0.00379891	0.999996	0.98939	['MAP2K2', 'VEGFB', 'LAMTOR2']	Reactome Pathways	0.00463261	upregulated
Downstream signaling of activated FGFR2 Homo sapiens R-HSA-5654696	0.355026	0.00371074	0.999996	0.989602	['MAP2K2', 'BAD', 'LAMTOR2']	Reactome Pathways	0.00453926	upregulated
Downstream signaling of activated FGFR4 Homo sapiens R-HSA-5654716	0.355026	0.00371074	0.999996	0.989602	['MAP2K2', 'BAD', 'LAMTOR2']	Reactome Pathways	0.00453926	upregulated
Downstream signaling of activated FGFR3 Homo sapiens R-HSA-5654708	0.355026	0.00371074	0.999996	0.989602	['MAP2K2', 'BAD', 'LAMTOR2']	Reactome Pathways	0.00453926	upregulated
Axon guidance Homo sapiens R-HSA-422475	0.453163	0.00464143	0.999996	0.98981	['MAP2K2', 'COL4A1', 'GPC1', 'PLXNB3', 'LAMTOR2', 'ARPC4']	Reactome Pathways	0.00444817	upregulated
Interleukin-3, 5 and GM-CSF signaling Homo sapiens R-HSA-512988	0.298352	0.00301519	0.999996	0.989945	['MAP2K2', 'LAMTOR2']	Reactome Pathways	0.00438905	upregulated
Downstream signaling of activated FGFR1 Homo sapiens R-HSA-5654687	0.351734	0.00345826	0.999996	0.990216	['MAP2K2', 'BAD', 'LAMTOR2']	Reactome Pathways	0.00427	upregulated
Signaling by FGFR4 Homo sapiens R-HSA-5654743	0.351734	0.00345826	0.999996	0.990216	['MAP2K2', 'BAD', 'LAMTOR2']	Reactome Pathways	0.00427	upregulated
Signaling by FGFR3 Homo sapiens R-HSA-5654741	0.350649	0.00337795	0.999996	0.990413	['MAP2K2', 'BAD', 'LAMTOR2']	Reactome Pathways	0.00418374	upregulated
Cell Cycle, Mitotic Homo sapiens R-HSA-69278	0.420905	0.00386226	0.999996	0.990866	['TK2', 'B9D2', 'LPIN3', 'ANAPC11', 'ANAPC2']	Reactome Pathways	0.00398513	upregulated
Signaling by FGFR1 Homo sapiens R-HSA-5654736	0.347436	0.00314795	0.999996	0.99098	['MAP2K2', 'BAD', 'LAMTOR2']	Reactome Pathways	0.00393494	upregulated
Innate Immune System Homo sapiens R-HSA-168249	0.528573	0.00433001	0.999996	0.991842	['RNF125', 'MAP2K2', 'BAD', 'TREX1', 'POLR2F', 'LAMTOR2', 'TRAF2', 'ARPC4', 'CNPY3', 'DDX41', 'POLR2L']	Reactome Pathways	0.00355769	upregulated
Downstream signal transduction Homo sapiens R-HSA-186763	0.342207	0.00279867	0.999996	0.991855	['MAP2K2', 'BAD', 'LAMTOR2']	Reactome Pathways	0.00355179	upregulated
G alpha (q) signalling events Homo sapiens R-HSA-416476	0.20367	0.00158659	0.999996	0.99224	['ABHD12']	Reactome Pathways	0.00338315	upregulated
DAP12 signaling Homo sapiens R-HSA-2424491	0.339143	0.00260786	0.999996	0.99234	['MAP2K2', 'BAD', 'LAMTOR2']	Reactome Pathways	0.00333953	upregulated
Downstream signaling events of B Cell Receptor (BCR) Homo sapiens R-HSA-1168372	0.202594	0.00153823	0.999996	0.992436	['BAD']	Reactome Pathways	0.00329746	upregulated
Peptide ligand-binding receptors Homo sapiens R-HSA-375276	0.201528	0.00149138	0.999996	0.992627	['OPRL1']	Reactome Pathways	0.00321394	upregulated
Signaling by EGFR Homo sapiens R-HSA-177929	0.328357	0.00201232	0.999996	0.99389	['MAP2K2', 'BAD', 'LAMTOR2']	Reactome Pathways	0.00266155	upregulated
DAP12 interactions Homo sapiens R-HSA-2172127	0.324599	0.00183105	0.999996	0.994375	['MAP2K2', 'BAD', 'LAMTOR2']	Reactome Pathways	0.00244983	upregulated
Hemostasis Homo sapiens R-HSA-109582	0.421631	0.00228119	0.999996	0.994604	['ABHD12', 'P2RX6', 'ITIH4', 'VEGFB', 'HMG20B', 'ATP2A1']	Reactome Pathways	0.0023497	upregulated
FCERI mediated MAPK activation Homo sapiens R-HSA-2871796	0.268852	0.00144662	0.999996	0.994634	['MAP2K2', 'LAMTOR2']	Reactome Pathways	0.00233682	upregulated
VEGFA-VEGFR2 Pathway Homo sapiens R-HSA-4420097	0.242252	0.000643433	0.999996	0.997347	['MAP2K2', 'LAMTOR2']	Reactome Pathways	0.00115351	upregulated
Signaling by the B Cell Receptor (BCR) Homo sapiens R-HSA-983705	0.166436	0.000441737	0.999996	0.997349	['BAD']	Reactome Pathways	0.00115266	upregulated
Fc epsilon receptor (FCERI) signaling Homo sapiens R-HSA-2454202	0.294235	0.00078056	0.999996	0.997351	['MAP2K2', 'BAD', 'LAMTOR2']	Reactome Pathways	0.00115212	upregulated
G alpha (i) signalling events Homo sapiens R-HSA-418594	0.161503	0.000358257	0.999996	0.997784	['OPRL1']	Reactome Pathways	0.000963383	upregulated
Cell Cycle Homo sapiens R-HSA-1640170	0.341004	0.000449732	0.999996	0.998682	['TK2', 'B9D2', 'LPIN3', 'ANAPC11', 'ANAPC2']	Reactome Pathways	0.000572768	upregulated
Gastrin-CREB signalling pathway via PKC and MAPK Homo sapiens R-HSA-881907	0.268337	0.000323232	0.999996	0.998796	['ABHD12', 'MAP2K2', 'LAMTOR2']	Reactome Pathways	0.000523139	upregulated
Class A/1 (Rhodopsin-like receptors) Homo sapiens R-HSA-373076	0.119357	3.17052e-05	0.999996	0.999734	['OPRL1']	Reactome Pathways	0.000115363	upregulated
Signal Transduction Homo sapiens R-HSA-162582	0.561897	6.70599e-05	0.999996	0.999881	['HDAC11', 'OPRL1', 'ATP2A1', 'RFNG', 'ACVR1B', 'LIN7B', 'PLB1', 'ABHD12', 'STK11', 'BCL2L11', 'RXRA', 'SHARPIN', 'GPC1', 'POLR2F', 'STAP2', 'POLR2J', 'MEN1', 'POLR2L', 'TLE4', 'NGFR', 'WWOX', 'MAP2K2', 'ATP6AP1', 'BAD', 'VEGFB', 'TRAF2', 'ARPC4', 'PYGO2', 'COL4A1', 'CDC42EP5', 'BAMBI', 'SDC1', 'LAMTOR2', 'RBCK1', 'B9D2', 'LAMTOR4', 'DNAL4']	Reactome Pathways	5.18312e-05	upregulated
GPCR ligand binding Homo sapiens R-HSA-500792	0.0856152	1.20963e-06	0.999996	0.999986	['OPRL1']	Reactome Pathways	6.136e-06	upregulated
Signaling by GPCR Homo sapiens R-HSA-372790	0.113936	5.52107e-07	0.999996	0.999995	['ABHD12', 'MAP2K2', 'OPRL1', 'LAMTOR2']	Reactome Pathways	2.1045e-06	upregulated
GPCR downstream signaling Homo sapiens R-HSA-388396	0.075814	3.38844e-07	0.999996	0.999996	['ABHD12', 'OPRL1']	Reactome Pathways	1.94104e-06	upregulated
